# Supplementary material for: Community Pharmacists’ Knowledge Regarding Donepezil Averse Effects and Self-Care Recommendations for Insomnia for Persons with AD
Source: Pharmacy (Basel). 2017 Jul 28;5(3):42. doi: 10.3390/pharmacy5030042 (PMC5622354; doi:10.3390/pharmacy5030042)
Supplement: Supplementary file 1 [file pharmacy-05-00042-s001.csv]

id	sex	degree	nausea	vomiting	diarrhea	loss_appetite	lower_hr	lower_bp	dizziness	insomnia	vivid_dreams	drowsy	fatigue	headache	otc_melatonin	otc_refer	otc_antichol	otc_dontknow	donep_odt	donep_tab10	donep_tab23	rivast_cap	excelo_patch	state
4036	Male	PharmD	Not identified	Not identified	Not identified	Not identified	Not identified	Not identified	Not identified	Not identified	Not identified	Identified	Not identified	Not identified	Not identified	Not identified	Not identified	Not identified	0	0	0	0	0	CA
4276	Female	PharmD	Identified	Not identified	Not identified	Not identified	Not identified	Not identified	Not identified	Not identified	Not identified	Not identified	Not identified	Not identified	Not identified	Identified	Not identified	Not identified	0	1	0	1	1	CA
4030	Female	PharmD	Not identified	Not identified	Not identified	Not identified	Not identified	Not identified	Identified	Not identified	Not identified	Identified	Not identified	Not identified	Identified	Not identified	Not identified	Not identified	0	1	0	0	0	CA
5066	Male	BS	Not identified	Not identified	Not identified	Not identified	Not identified	Not identified	Not identified	Not identified	Not identified	Not identified	Not identified	Not identified	Not identified	Not identified	Not identified	Identified	1	1	0	0	1	WV
5505	Female	BS	Identified	Not identified	Not identified	Not identified	Not identified	Not identified	Not identified	Not identified	Not identified	Not identified	Not identified	Not identified	Identified	Not identified	Not identified	Not identified	1	1	0	0	0	WV
2016	Male	PharmD	Identified	Identified	Identified	Not identified	Not identified	Not identified	Not identified	Not identified	Not identified	Not identified	Not identified	Identified	Identified	Not identified	Not identified	Not identified	0	1	1	1	1	SD
4271	Male	PharmD	Not identified	Not identified	Not identified	Not identified	Not identified	Not identified	Not identified	Not identified	Not identified	Identified	Not identified	Not identified	Not identified	Not identified	Not identified	Identified	0	0	0	0	0	CA
5157	Female	PharmD	Not identified	Not identified	Identified	Not identified	Not identified	Not identified	Not identified	Not identified	Not identified	Not identified	Not identified	Not identified	Not identified	Not identified	Not identified	Identified	0	1	0	0	1	WV
4137	Male	BS	Not identified	Not identified	Not identified	Not identified	Not identified	Not identified	Identified	Not identified	Not identified	Identified	Not identified	Not identified	Identified	Not identified	Not identified	Not identified	0	1	0	0	0	CA
4015	Female	PharmD	Identified	Not identified	Not identified	Not identified	Not identified	Not identified	Identified	Not identified	Not identified	Identified	Not identified	Not identified	Not identified	Identified	Not identified	Not identified						CA
5232	Female	PharmD	Not identified	Not identified	Not identified	Not identified	Not identified	Not identified	Not identified	Not identified	Not identified	Not identified	Not identified	Not identified	Identified	Not identified	Not identified	Not identified	0	1	0	1	1	WV
5397	Female	BS	Identified	Not identified	Not identified	Not identified	Not identified	Not identified	Not identified	Not identified	Not identified	Not identified	Not identified	Not identified	Not identified	Identified	Not identified	Not identified						WV
5252	Female	PharmD	Not identified	Not identified	Not identified	Not identified	Not identified	Not identified	Identified	Not identified	Not identified	Identified	Not identified	Not identified	Not identified	Not identified	Identified	Not identified	0	1	1	0	0	WV
5348	Female	PharmD	Identified	Not identified	Not identified	Not identified	Not identified	Not identified	Not identified	Not identified	Not identified	Not identified	Not identified	Not identified	Not identified	Identified	Not identified	Not identified	0	1	0	0	1	WV
5495	Female	PharmD	Not identified	Not identified	Not identified	Not identified	Not identified	Not identified	Identified	Not identified	Not identified	Not identified	Not identified	Not identified	Not identified	Identified	Not identified	Not identified	0	1	0	0	0	WV
1163	Male	BS	Not identified	Not identified	Not identified	Not identified	Not identified	Not identified	Not identified	Not identified	Not identified	Identified	Not identified	Not identified	Not identified	Identified	Not identified	Not identified	1	1	0	0	1	ND
4301	Male	BS	Identified	Not identified	Not identified	Not identified	Not identified	Not identified	Not identified	Not identified	Not identified	Identified	Not identified	Not identified	Identified	Not identified	Not identified	Not identified	0	1	0	0	0	CA
5316	Male	PharmD	Identified	Not identified	Not identified	Identified	Not identified	Not identified	Not identified	Not identified	Not identified	Not identified	Not identified	Not identified	Identified	Not identified	Not identified	Not identified	0	1	0	0	1	WV
5287	Male	PharmD	Not identified	Not identified	Not identified	Not identified	Not identified	Not identified	Not identified	Not identified	Not identified	Identified	Not identified	Not identified	Not identified	Not identified	Identified	Not identified	0	1	0	0	1	WV
4253	Male	BS	Not identified	Not identified	Not identified	Not identified	Not identified	Not identified	Not identified	Not identified	Not identified	Identified	Not identified	Not identified	Not identified	Identified	Not identified	Not identified	1	1	0	0	1	CA
4226	Male	BS	Not identified	Not identified	Not identified	Not identified	Not identified	Not identified	Not identified	Not identified	Not identified	Not identified	Not identified	Not identified	Identified	Not identified	Not identified	Not identified	0	1	0	0	1	OR
2138	Male	BS	Not identified	Not identified	Not identified	Not identified	Not identified	Not identified	Not identified	Not identified	Not identified	Not identified	Not identified	Not identified	Not identified	Identified	Not identified	Not identified	0	1	0	0	0	SD
2102	Male	PharmD	Not identified	Not identified	Not identified	Not identified	Not identified	Not identified	Not identified	Not identified	Not identified	Not identified	Not identified	Not identified	Not identified	Not identified	Not identified	Identified	0	1	1	0	0	SD
5134	Male	PharmD	Not identified	Not identified	Not identified	Not identified	Not identified	Not identified	Not identified	Not identified	Not identified	Not identified	Not identified	Not identified	Not identified	Not identified	Not identified	Identified	0	1	0	0	0	WV
5467	Female	BS	Not identified	Not identified	Not identified	Not identified	Not identified	Not identified	Identified	Not identified	Not identified	Identified	Not identified	Not identified	Not identified	Not identified	Not identified	Identified	1	1	0	0	1	WV
5013	Male	BS	Identified	Not identified	Not identified	Not identified	Not identified	Not identified	Not identified	Not identified	Not identified	Not identified	Not identified	Not identified	Not identified	Not identified	Identified	Not identified	0	1	0	0	1	WV
2109	Female	BS	Not identified	Not identified	Not identified	Not identified	Not identified	Not identified	Not identified	Not identified	Not identified	Identified	Not identified	Not identified	Not identified	Not identified	Identified	Not identified	0	0	0	1	0	SD
1046	Male	BS	Not identified	Not identified	Not identified	Not identified	Not identified	Not identified	Not identified	Not identified	Not identified	Not identified	Not identified	Not identified	Not identified	Not identified	Not identified	Identified	0	1	1	1	1	ND
5322	Female	PharmD	Not identified	Not identified	Not identified	Not identified	Not identified	Not identified	Identified	Not identified	Not identified	Not identified	Not identified	Not identified	Not identified	Identified	Not identified	Not identified	0	1	1	0	1	WV
5016	Female	BS	Not identified	Not identified	Not identified	Not identified	Not identified	Not identified	Not identified	Not identified	Not identified	Identified	Not identified	Not identified	Not identified	Not identified	Not identified	Identified	1	1	0	0	1	WV
5088	Female	PharmD	Not identified	Not identified	Not identified	Identified	Not identified	Not identified	Not identified	Not identified	Not identified	Not identified	Not identified	Not identified	Identified	Not identified	Not identified	Not identified	0	1	0	0	1	WV
5161	Male	BS	Identified	Identified	Not identified	Not identified	Not identified	Not identified	Not identified	Not identified	Not identified	Not identified	Not identified	Not identified	Identified	Not identified	Not identified	Not identified	0	0	1	0	1	WV
1178	Female	PharmD	Identified	Not identified	Not identified	Not identified	Not identified	Not identified	Not identified	Not identified	Not identified	Identified	Not identified	Not identified	Identified	Not identified	Not identified	Not identified	0	1	0	0	0	ND
4045	Male	BS	Identified	Identified	Identified	Not identified	Not identified	Not identified	Not identified	Not identified	Not identified	Not identified	Not identified	Identified	Identified	Not identified	Not identified	Not identified	0	1	0	0	0	OR
4117	Male	BS	Not identified	Not identified	Not identified	Not identified	Not identified	Not identified	Identified	Not identified	Not identified	Identified	Not identified	Not identified	Identified	Not identified	Not identified	Not identified	0	1	0	1	1	CA
1028	Female	PharmD	Identified	Identified	Not identified	Not identified	Not identified	Not identified	Not identified	Not identified	Not identified	Not identified	Not identified	Not identified	Not identified	Not identified	Identified	Not identified	0	1	0	0	0	ND
5308	Male	BS	Identified	Not identified	Not identified	Not identified	Not identified	Not identified	Not identified	Not identified	Not identified	Identified	Not identified	Not identified	Not identified	Not identified	Not identified	Identified	1	1	1	0	1	WV
5086	Female	PharmD	Identified	Not identified	Identified	Not identified	Not identified	Not identified	Not identified	Not identified	Not identified	Not identified	Not identified	Not identified	Identified	Not identified	Not identified	Not identified	0	1	0	0	0	WV
5038	Male	BS	Not identified	Not identified	Not identified	Not identified	Not identified	Not identified	Not identified	Not identified	Not identified	Identified	Not identified	Not identified	Identified	Not identified	Not identified	Not identified	0	1	0	1	1	WV
1136	Male	BS	Not identified	Not identified	Not identified	Not identified	Not identified	Not identified	Not identified	Not identified	Not identified	Not identified	Not identified	Not identified	Not identified	Not identified	Not identified	Identified	0	0	0	0	1	ND
1110	Female	PharmD	Identified	Not identified	Not identified	Not identified	Not identified	Not identified	Not identified	Not identified	Not identified	Not identified	Not identified	Not identified	Identified	Not identified	Not identified	Not identified	0	1	1	1	1	ND
5458	Male	BS	Not identified	Not identified	Identified	Not identified	Not identified	Not identified	Not identified	Not identified	Not identified	Not identified	Not identified	Not identified	Not identified	Not identified	Not identified	Identified	0	1	0	0	1	WV
5028	Male	BS	Not identified	Not identified	Not identified	Not identified	Not identified	Not identified	Not identified	Not identified	Not identified	Not identified	Not identified	Not identified	Not identified	Not identified	Not identified	Identified						WV
1045	Male	BS	Not identified	Not identified	Not identified	Not identified	Not identified	Not identified	Not identified	Not identified	Not identified	Identified	Not identified	Not identified	Identified	Not identified	Not identified	Not identified	0	1	0	0	1	ND
5056	Female	BS	Not identified	Not identified	Not identified	Not identified	Not identified	Not identified	Not identified	Not identified	Not identified	Not identified	Not identified	Not identified	Not identified	Identified	Not identified	Not identified	0	1	1	0	0	WV
4051	Male	PharmD	Not identified	Not identified	Not identified	Not identified	Not identified	Not identified	Not identified	Not identified	Not identified	Identified	Not identified	Not identified	Not identified	Not identified	Not identified	Identified	1	1	1	0	0	OR
4217	Male	PharmD	Identified	Identified	Not identified	Not identified	Not identified	Not identified	Identified	Not identified	Not identified	Not identified	Not identified	Not identified	Not identified	Not identified	Not identified	Identified	0	1	0	0	0	CA
5109	Male	BS	Not identified	Not identified	Not identified	Not identified	Not identified	Not identified	Not identified	Not identified	Not identified	Identified	Not identified	Not identified	Not identified	Not identified	Not identified	Identified						WV
2127	Female	BS	Not identified	Not identified	Not identified	Not identified	Not identified	Not identified	Identified	Not identified	Not identified	Not identified	Not identified	Not identified	Identified	Not identified	Not identified	Not identified	0	1	0	0	0	SD
5302	Male	PharmD	Not identified	Not identified	Not identified	Not identified	Not identified	Not identified	Not identified	Not identified	Not identified	Not identified	Not identified	Not identified	Not identified	Not identified	Not identified	Identified	0	1	1	0	1	WV
1014	Male	BS	Not identified	Not identified	Identified	Not identified	Not identified	Not identified	Not identified	Not identified	Not identified	Not identified	Not identified	Not identified	Not identified	Identified	Not identified	Not identified	0	1	1	0	0	ND
2156	Male	PharmD	Identified	Not identified	Not identified	Identified	Not identified	Not identified	Not identified	Not identified	Not identified	Not identified	Not identified	Not identified	Identified	Not identified	Not identified	Not identified	0	0	0	0	0	SD
2093	Male	PharmD	Identified	Not identified	Identified	Not identified	Not identified	Not identified	Not identified	Not identified	Not identified	Identified	Not identified	Not identified	Not identified	Not identified	Not identified	Identified	0	1	1	1	1	SD
2019	Female	PharmD	Identified	Not identified	Not identified	Not identified	Not identified	Not identified	Not identified	Not identified	Not identified	Not identified	Not identified	Not identified	Not identified	Identified	Not identified	Not identified	0	1	0	0	1	SD
2077	Female	BS	Not identified	Not identified	Not identified	Not identified	Not identified	Not identified	Identified	Not identified	Not identified	Identified	Not identified	Not identified	Identified	Not identified	Not identified	Not identified	0	1	0	0	1	SD
5008	Female	BS	Not identified	Not identified	Not identified	Not identified	Not identified	Not identified	Not identified	Not identified	Not identified	Identified	Not identified	Not identified	Not identified	Identified	Not identified	Not identified	0	1	1	0	0	WV
5032	Male	BS	Not identified	Not identified	Not identified	Not identified	Not identified	Not identified	Not identified	Not identified	Not identified	Not identified	Not identified	Not identified	Not identified	Identified	Not identified	Not identified	0	1	0	0	0	WV
5146	Male	PharmD	Identified	Not identified	Identified	Not identified	Not identified	Not identified	Not identified	Identified	Not identified	Not identified	Not identified	Not identified	Identified	Not identified	Not identified	Not identified	0	1	1	1	1	WV
2003	Female	PharmD	Identified	Identified	Identified	Not identified	Not identified	Not identified	Not identified	Not identified	Not identified	Not identified	Not identified	Not identified	Identified	Not identified	Not identified	Not identified	0	1	1	1	1	SD
5432	Male	BS	Not identified	Not identified	Not identified	Not identified	Not identified	Not identified	Not identified	Not identified	Not identified	Not identified	Not identified	Not identified	Identified	Not identified	Not identified	Not identified						WV
5334	Male	BS	Not identified	Not identified	Not identified	Not identified	Not identified	Not identified	Not identified	Not identified	Not identified	Not identified	Not identified	Not identified	Identified	Not identified	Not identified	Not identified	0	1	0	0	1	WV
5356	Female	PharmD	Not identified	Not identified	Not identified	Not identified	Not identified	Not identified	Identified	Not identified	Not identified	Identified	Not identified	Not identified	Identified	Not identified	Not identified	Not identified	0	1	1	0	1	WV
2079	Female	PharmD	Not identified	Not identified	Not identified	Not identified	Not identified	Not identified	Identified	Not identified	Not identified	Identified	Not identified	Not identified	Not identified	Identified	Not identified	Not identified	1	1	0	0	0	SD
5320	Female	PharmD	Not identified	Not identified	Not identified	Not identified	Not identified	Not identified	Not identified	Not identified	Not identified	Not identified	Not identified	Not identified	Identified	Not identified	Not identified	Not identified	0	1	0	1	1	WV
5069	Male	PharmD	Identified	Identified	Identified	Not identified	Not identified	Not identified	Not identified	Not identified	Not identified	Not identified	Not identified	Not identified	Identified	Not identified	Not identified	Not identified	1	1	1	1	1	WV
4061	Female	PharmD	Identified	Not identified	Not identified	Not identified	Not identified	Not identified	Not identified	Not identified	Not identified	Not identified	Not identified	Not identified	Not identified	Identified	Not identified	Not identified	0	1	1	1	0	OR
2169	Male	PharmD	Not identified	Not identified	Not identified	Not identified	Not identified	Not identified	Not identified	Identified	Not identified	Not identified	Not identified	Identified	Not identified	Not identified	Not identified	Identified	0	1	0	0	0	SD
5440	Female	BS	Identified	Not identified	Not identified	Not identified	Not identified	Not identified	Not identified	Identified	Not identified	Not identified	Not identified	Not identified	Identified	Not identified	Not identified	Not identified	0	1	1	0	1	WV
5497	Female	PharmD	Identified	Not identified	Not identified	Not identified	Not identified	Not identified	Not identified	Identified	Not identified	Not identified	Not identified	Not identified	Not identified	Identified	Not identified	Not identified	1	1	0	1	1	WV
5224	Female	PharmD	Not identified	Not identified	Not identified	Not identified	Not identified	Not identified	Not identified	Not identified	Not identified	Not identified	Not identified	Not identified	Identified	Not identified	Not identified	Not identified	1	1	1	1	1	WV
2014	Female	BS	Not identified	Not identified	Not identified	Not identified	Not identified	Not identified	Identified	Not identified	Not identified	Identified	Not identified	Not identified	Not identified	Not identified	Identified	Not identified	0	0	1	0	0	SD
5414	Male	BS	Not identified	Not identified	Not identified	Not identified	Not identified	Not identified	Not identified	Not identified	Not identified	Identified	Not identified	Not identified	Not identified	Not identified	Identified	Not identified	1	1	0	1	1	WV
5044	Female	PharmD	Not identified	Not identified	Not identified	Not identified	Not identified	Not identified	Not identified	Not identified	Not identified	Not identified	Not identified	Not identified	Identified	Not identified	Not identified	Not identified	0	1	1	0	0	WV
2104	Male	PharmD	Not identified	Not identified	Not identified	Not identified	Not identified	Not identified	Not identified	Not identified	Not identified	Identified	Not identified	Not identified	Not identified	Identified	Not identified	Not identified	0	0	0	0	0	SD
2072	Male	PharmD	Identified	Not identified	Not identified	Not identified	Not identified	Not identified	Not identified	Not identified	Not identified	Not identified	Not identified	Not identified	Not identified	Not identified	Not identified	Identified	0	1	0	0	0	SD
5240	Male	PharmD	Not identified	Not identified	Not identified	Not identified	Not identified	Not identified	Not identified	Not identified	Not identified	Not identified	Not identified	Not identified	Not identified	Not identified	Not identified	Identified	0	1	0	0	1	WV
4150	Male	BS	Not identified	Not identified	Not identified	Not identified	Not identified	Not identified	Not identified	Not identified	Not identified	Identified	Not identified	Not identified	Identified	Not identified	Not identified	Not identified	0	1	0	0	0	OR
5514	Female	BS	Identified	Identified	Identified	Identified	Not identified	Not identified	Not identified	Not identified	Not identified	Not identified	Not identified	Not identified	Not identified	Not identified	Identified	Not identified	0	1	0	0	1	WV
4007	Female	BS	Not identified	Not identified	Not identified	Not identified	Not identified	Not identified	Identified	Not identified	Not identified	Not identified	Not identified	Not identified	Not identified	Not identified	Identified	Not identified	0	1	1	0	0	CA
2031	Male	PharmD	Not identified	Not identified	Not identified	Not identified	Not identified	Not identified	Not identified	Not identified	Not identified	Not identified	Not identified	Not identified	Identified	Not identified	Not identified	Not identified	0	1	0	0	0	SD
2110	Female	PharmD	Identified	Not identified	Identified	Not identified	Not identified	Not identified	Identified	Not identified	Not identified	Identified	Not identified	Not identified	Identified	Not identified	Not identified	Not identified	0	1	1	1	1	SD
5380	Female	PharmD	Identified	Not identified	Identified	Not identified	Not identified	Not identified	Identified	Not identified	Not identified	Not identified	Not identified	Not identified	Not identified	Not identified	Not identified	Identified	0	1	1	0	0	WV
2073	Female	BS	Identified	Identified	Not identified	Not identified	Not identified	Not identified	Not identified	Not identified	Not identified	Not identified	Not identified	Not identified	Not identified	Not identified	Not identified	Identified	0	1	0	0	1	SD
5473	Female	PharmD	Not identified	Not identified	Not identified	Not identified	Not identified	Not identified	Not identified	Not identified	Not identified	Identified	Not identified	Not identified	Not identified	Not identified	Not identified	Identified	0	1	1	1	1	WV
5124	Male	PharmD	Identified	Not identified	Identified	Not identified	Not identified	Not identified	Identified	Not identified	Not identified	Not identified	Not identified	Not identified	Not identified	Not identified	Not identified	Identified	1	1	0	1	1	WV
2076	Female	BS	Not identified	Not identified	Not identified	Not identified	Not identified	Not identified	Identified	Not identified	Not identified	Identified	Not identified	Not identified	Not identified	Not identified	Not identified	Identified	0	1	0	1	0	SD
5270	Male	PharmD	Not identified	Not identified	Not identified	Not identified	Not identified	Not identified	Identified	Identified	Not identified	Identified	Not identified	Not identified	Not identified	Identified	Not identified	Not identified	0	1	0	0	1	WV
2150	Female	PharmD	Identified	Identified	Not identified	Not identified	Not identified	Not identified	Not identified	Not identified	Not identified	Not identified	Not identified	Not identified	Identified	Not identified	Not identified	Not identified	0	1	0	0	0	SD
4098	Male	PharmD	Not identified	Not identified	Not identified	Not identified	Not identified	Not identified	Not identified	Not identified	Not identified	Identified	Not identified	Not identified	Identified	Not identified	Not identified	Not identified	0	1	0	0	0	OR
5100	Male	BS	Not identified	Not identified	Not identified	Not identified	Not identified	Not identified	Not identified	Not identified	Not identified	Identified	Not identified	Not identified	Identified	Not identified	Not identified	Not identified	0	1	0	1	1	WV
2176	Female	PharmD	Not identified	Not identified	Not identified	Not identified	Not identified	Not identified	Not identified	Not identified	Not identified	Identified	Not identified	Not identified	Not identified	Not identified	Identified	Not identified	0	1	1	1	1	SD
5084	Female	BS	Identified	Identified	Not identified	Identified	Not identified	Not identified	Not identified	Not identified	Not identified	Not identified	Not identified	Not identified	Not identified	Not identified	Not identified	Identified						WV
2141	Female	PharmD	Not identified	Not identified	Not identified	Not identified	Not identified	Not identified	Not identified	Not identified	Not identified	Identified	Not identified	Identified	Identified	Not identified	Not identified	Not identified	0	1	1	1	1	SD
5303	Female	BS	Identified	Not identified	Not identified	Not identified	Not identified	Not identified	Identified	Identified	Not identified	Identified	Not identified	Not identified	Not identified	Identified	Not identified	Not identified	0	1	1	1	1	WV
4059	Female	BS	Not identified	Not identified	Not identified	Not identified	Not identified	Not identified	Not identified	Not identified	Not identified	Not identified	Not identified	Not identified	Not identified	Not identified	Not identified	Identified	0	1	1	0	0	OR
4120	Female	BS	Not identified	Not identified	Identified	Not identified	Not identified	Not identified	Not identified	Not identified	Not identified	Not identified	Not identified	Not identified	Not identified	Identified	Not identified	Not identified	0	1	1	0	1	CA
1043	Male	BS	Identified	Not identified	Not identified	Not identified	Not identified	Not identified	Not identified	Not identified	Not identified	Not identified	Not identified	Not identified	Not identified	Not identified	Not identified	Identified	0	1	0	0	0	ND
5325	Female	BS	Not identified	Not identified	Not identified	Not identified	Not identified	Not identified	Not identified	Not identified	Not identified	Not identified	Not identified	Not identified	Identified	Not identified	Not identified	Not identified	0	1	1	0	1	WV
2123	Female	BS	Identified	Not identified	Identified	Not identified	Not identified	Not identified	Not identified	Not identified	Not identified	Not identified	Not identified	Not identified	Identified	Not identified	Not identified	Not identified	0	1	1	0	0	SD
2165	Male	PharmD	Not identified	Not identified	Not identified	Not identified	Not identified	Not identified	Not identified	Not identified	Not identified	Not identified	Not identified	Not identified	Identified	Not identified	Not identified	Not identified	0	1	1	1	1	SD
5410	Female	PharmD	Not identified	Not identified	Not identified	Not identified	Not identified	Not identified	Not identified	Not identified	Not identified	Not identified	Not identified	Not identified	Identified	Not identified	Not identified	Not identified	0	1	1	0	0	WV
4254	Female	PharmD	Not identified	Not identified	Not identified	Not identified	Not identified	Not identified	Not identified	Not identified	Not identified	Not identified	Not identified	Not identified	Identified	Not identified	Not identified	Not identified	0	1	0	1	1	CA
2155	Female	PharmD	Not identified	Not identified	Not identified	Not identified	Not identified	Not identified	Not identified	Not identified	Not identified	Not identified	Not identified	Not identified	Not identified	Not identified	Not identified	Identified	0	1	0	0	0	SD
5415	Male	BS	Identified	Not identified	Not identified	Not identified	Not identified	Not identified	Not identified	Not identified	Not identified	Identified	Not identified	Not identified	Not identified	Not identified	Identified	Not identified	0	1	1	0	1	WV
1140	Female	PharmD	Not identified	Not identified	Not identified	Not identified	Not identified	Not identified	Not identified	Not identified	Not identified	Identified	Not identified	Not identified	Identified	Not identified	Not identified	Not identified	0	1	1	0	0	ND
5350	Male	PharmD	Not identified	Not identified	Not identified	Not identified	Not identified	Not identified	Identified	Not identified	Not identified	Identified	Not identified	Not identified	Not identified	Identified	Not identified	Not identified	0	1	1	0	1	WV
4106	Female	PharmD	Identified	Identified	Identified	Not identified	Not identified	Not identified	Not identified	Not identified	Not identified	Not identified	Not identified	Not identified	Not identified	Identified	Not identified	Not identified	0	1	1	0	0	CA
1034	Female	BS	Not identified	Not identified	Not identified	Not identified	Not identified	Not identified	Not identified	Not identified	Not identified	Not identified	Not identified	Not identified	Identified	Not identified	Not identified	Not identified	0	1	0	0	1	ND
4186	Male	PharmD	Identified	Identified	Identified	Not identified	Not identified	Not identified	Not identified	Not identified	Not identified	Not identified	Not identified	Not identified	Identified	Not identified	Not identified	Not identified	1	1	0	0	1	CA
5091	Male	BS	Not identified	Not identified	Not identified	Not identified	Not identified	Not identified	Not identified	Not identified	Not identified	Not identified	Not identified	Not identified	Not identified	Not identified	Identified	Not identified	0	0	0	0	0	WV
5422	Female	PharmD	Not identified	Not identified	Not identified	Not identified	Not identified	Not identified	Identified	Not identified	Not identified	Not identified	Not identified	Not identified	Not identified	Not identified	Identified	Not identified	0	1	0	0	1	WV
4077	Female	BS	Not identified	Not identified	Not identified	Not identified	Not identified	Not identified	Not identified	Not identified	Not identified	Identified	Not identified	Not identified	Not identified	Identified	Not identified	Not identified	0	1	0	0	0	CA
2125	Female	PharmD	Not identified	Not identified	Not identified	Not identified	Not identified	Not identified	Not identified	Not identified	Not identified	Identified	Not identified	Not identified	Identified	Not identified	Not identified	Not identified	0	1	0	0	0	SD
2124	Female	BS	Not identified	Not identified	Not identified	Not identified	Not identified	Not identified	Not identified	Not identified	Not identified	Not identified	Not identified	Not identified	Not identified	Identified	Not identified	Not identified	0	0	0	1	0	SD
1080	Female	PharmD	Not identified	Not identified	Not identified	Not identified	Not identified	Not identified	Not identified	Not identified	Not identified	Identified	Not identified	Not identified	Identified	Not identified	Not identified	Not identified	0	1	0	1	0	ND
2166	Male	BS													Not identified	Not identified	Not identified	Identified						SD
4148	Male	PharmD	Not identified	Not identified	Not identified	Not identified	Not identified	Not identified	Not identified	Not identified	Not identified	Identified	Not identified	Not identified	Not identified	Not identified	Not identified	Identified	1	1	0	0	0	CA
4179	Female	PharmD	Identified	Not identified	Not identified	Not identified	Not identified	Not identified	Identified	Not identified	Not identified	Identified	Not identified	Not identified	Not identified	Not identified	Not identified	Identified						OR
2039	Male	PharmD	Not identified	Not identified	Not identified	Not identified	Not identified	Not identified	Identified	Not identified	Not identified	Identified	Not identified	Not identified	Not identified	Identified	Not identified	Not identified	0	1	0	0	0	SD
5197	Female	BS	Identified	Not identified	Not identified	Not identified	Not identified	Not identified	Not identified	Not identified	Not identified	Identified	Not identified	Not identified	Not identified	Identified	Not identified	Not identified	1	1	0	1	0	WV
5470	Male	PharmD	Identified	Identified	Identified	Not identified	Not identified	Not identified	Not identified	Not identified	Not identified	Not identified	Not identified	Not identified	Identified	Not identified	Not identified	Not identified	0	1	0	0	0	WV
1016	Female	BS	Not identified	Not identified	Not identified	Not identified	Not identified	Not identified	Not identified	Not identified	Not identified	Not identified	Not identified	Not identified	Not identified	Not identified	Not identified	Identified	1	1	1	0	1	ND
5095	Male	BS	Not identified	Not identified	Not identified	Not identified	Not identified	Not identified	Not identified	Not identified	Not identified	Identified	Not identified	Not identified	Not identified	Not identified	Identified	Not identified	0	1	1	0	1	WV
4266	Male	PharmD	Identified	Not identified	Not identified	Not identified	Not identified	Not identified	Not identified	Not identified	Not identified	Identified	Not identified	Not identified	Not identified	Not identified	Not identified	Identified						CA
4140	Male	PharmD	Identified	Identified	Not identified	Not identified	Not identified	Not identified	Not identified	Not identified	Not identified	Not identified	Not identified	Not identified	Identified	Not identified	Not identified	Not identified	1	1	0	1	1	OR
5398	Male	BS	Identified	Identified	Not identified	Not identified	Not identified	Not identified	Identified	Not identified	Not identified	Not identified	Not identified	Not identified	Not identified	Not identified	Identified	Not identified	0	1	0	1	1	WV
5120	Male	BS	Not identified	Not identified	Not identified	Not identified	Not identified	Not identified	Not identified	Not identified	Not identified	Not identified	Not identified	Not identified	Not identified	Not identified	Not identified	Identified						WV
1175	Female	BS	Not identified	Not identified	Not identified	Not identified	Not identified	Not identified	Not identified	Not identified	Not identified	Identified	Not identified	Not identified	Not identified	Identified	Not identified	Not identified	0	1	0	1	1	ND
5454	Male	BS	Not identified	Not identified	Not identified	Not identified	Not identified	Not identified	Not identified	Not identified	Not identified	Not identified	Not identified	Not identified	Not identified	Not identified	Not identified	Identified	0	1	0	0	0	WV
4162	Male	PharmD	Not identified	Not identified	Not identified	Not identified	Not identified	Not identified	Not identified	Not identified	Not identified	Not identified	Not identified	Not identified	Not identified	Not identified	Not identified	Identified	0	1	0	0	1	CA
4220	Male	PharmD	Not identified	Not identified	Not identified	Not identified	Not identified	Not identified	Not identified	Not identified	Not identified	Not identified	Not identified	Not identified	Not identified	Not identified	Not identified	Identified	0	1	0	0	0	OR
4237	Female	BS	Not identified	Not identified	Not identified	Identified	Not identified	Not identified	Identified	Not identified	Not identified	Identified	Not identified	Not identified	Not identified	Not identified	Not identified	Identified	0	1	0	0	1	OR
4134	Male	BS	Not identified	Not identified	Not identified	Not identified	Not identified	Not identified	Not identified	Not identified	Not identified	Not identified	Not identified	Not identified	Not identified	Not identified	Identified	Not identified	0	1	1	1	0	OR
4124	Male	PharmD	Identified	Not identified	Not identified	Not identified	Not identified	Not identified	Not identified	Not identified	Not identified	Identified	Not identified	Not identified	Not identified	Not identified	Not identified	Identified	1	0	0			CA
2148	Female	PharmD	Identified	Not identified	Not identified	Not identified	Not identified	Not identified	Identified	Not identified	Not identified	Identified	Identified	Not identified	Identified	Not identified	Not identified	Not identified	0	1	0	0	0	SD
5450	Female	PharmD	Identified	Not identified	Identified	Not identified	Not identified	Not identified	Not identified	Not identified	Not identified	Not identified	Not identified	Identified	Identified	Not identified	Not identified	Not identified	0	1	0	1	0	WV
5417	Male	PharmD	Identified	Identified	Not identified	Not identified	Not identified	Not identified	Identified	Not identified	Not identified	Not identified	Not identified	Not identified	Not identified	Not identified	Not identified	Identified	1	1	1	0	1	WV
5375	Male	PharmD	Identified	Not identified	Not identified	Not identified	Not identified	Not identified	Identified	Not identified	Not identified	Identified	Not identified	Not identified	Not identified	Not identified	Not identified	Identified	0	1	1	0	0	WV
4184	Female	BS	Identified	Not identified	Not identified	Not identified	Not identified	Not identified	Identified	Not identified	Not identified	Not identified	Not identified	Not identified	Identified	Not identified	Not identified	Not identified	0	1	1	0	0	OR
4026	Male	BS	Identified	Not identified	Not identified	Not identified	Not identified	Not identified	Not identified	Not identified	Identified	Identified	Not identified	Not identified	Not identified	Identified	Not identified	Not identified	0	1	1	1	1	CA
5070	Male	BS	Not identified	Not identified	Not identified	Not identified	Not identified	Not identified	Not identified	Not identified	Not identified	Identified	Not identified	Identified	Identified	Not identified	Not identified	Not identified	0	1	1	0	1	WV
5317	Male	BS	Identified	Not identified	Identified	Not identified	Not identified	Not identified	Identified	Not identified	Not identified	Identified	Not identified	Identified	Identified	Not identified	Not identified	Not identified	1	1	1	1	1	WV
5089	Male	BS	Identified	Not identified	Identified	Not identified	Not identified	Not identified	Not identified	Not identified	Not identified	Not identified	Not identified	Not identified	Not identified	Not identified	Not identified	Identified	0	1	0	0	0	WV
4190	Female	BS	Not identified	Not identified	Not identified	Identified	Not identified	Not identified	Not identified	Not identified	Not identified	Not identified	Not identified	Not identified	Not identified	Not identified	Not identified	Identified	1	1	0	0	0	CA
4218	Female	PharmD	Not identified	Not identified	Not identified	Not identified	Not identified	Not identified	Not identified	Not identified	Not identified	Not identified	Not identified	Not identified	Not identified	Not identified	Not identified	Identified	0	1	0	0	0	CA
5278	Female	BS	Identified	Identified	Not identified	Not identified	Not identified	Not identified	Identified	Not identified	Not identified	Identified	Not identified	Not identified	Identified	Not identified	Not identified	Not identified	0	1	0	0	0	WV
2036	Female	BS	Not identified	Not identified	Not identified	Not identified	Not identified	Not identified	Not identified	Not identified	Not identified	Identified	Not identified	Not identified	Not identified	Identified	Not identified	Not identified	1	1	0	0	0	SD
4022	Male	BS	Identified	Not identified	Not identified	Not identified	Not identified	Not identified	Not identified	Not identified	Not identified	Identified	Not identified	Not identified	Not identified	Identified	Not identified	Not identified	1	1	0	0	1	CA
2015	Male	BS	Not identified	Not identified	Not identified	Not identified	Not identified	Not identified	Not identified	Not identified	Not identified	Identified	Not identified	Not identified	Not identified	Not identified	Identified	Not identified	0	1	0	0	0	SD
4172	Male	PharmD	Identified	Not identified	Not identified	Not identified	Not identified	Not identified	Not identified	Not identified	Not identified	Not identified	Not identified	Not identified	Identified	Not identified	Not identified	Not identified	0	1	0	0	0	OR
5015	Male	PharmD	Not identified	Not identified	Not identified	Not identified	Not identified	Not identified	Not identified	Not identified	Not identified	Not identified	Not identified	Not identified	Identified	Not identified	Not identified	Not identified	0	0	0	0	0	WV
2060	Female	PharmD	Identified	Not identified	Not identified	Not identified	Not identified	Not identified	Not identified	Not identified	Not identified	Not identified	Not identified	Not identified	Not identified	Identified	Not identified	Not identified	0	1	0	0	1	SD
5264	Male	PharmD	Not identified	Not identified	Not identified	Not identified	Not identified	Not identified	Identified	Not identified	Not identified	Identified	Not identified	Not identified	Not identified	Not identified	Not identified	Identified	0	1	0	0	0	WV
5503	Male	BS	Not identified	Not identified	Not identified	Not identified	Not identified	Not identified	Not identified	Not identified	Not identified	Identified	Not identified	Not identified	Not identified	Not identified	Not identified	Identified	0	0	0	0	1	WV
5162	Male	PharmD	Not identified	Not identified	Identified	Not identified	Not identified	Not identified	Not identified	Not identified	Not identified	Identified	Not identified	Not identified	Not identified	Identified	Not identified	Not identified	0	1	0	0	0	WV
2083	Female	BS	Identified	Not identified	Not identified	Not identified	Not identified	Not identified	Not identified	Not identified	Not identified	Not identified	Not identified	Not identified	Not identified	Not identified	Not identified	Identified	0	1	0	1	0	SD
2137	Female	PharmD	Identified	Identified	Identified	Not identified	Not identified	Not identified	Identified	Not identified	Not identified	Identified	Not identified	Not identified	Not identified	Not identified	Not identified	Identified	0	1	0	0	0	SD
1129	Female	BS	Not identified	Not identified	Not identified	Not identified	Not identified	Not identified	Not identified	Not identified	Not identified	Not identified	Not identified	Not identified	Not identified	Not identified	Not identified	Identified	0	1	1	1	1	ND
4193	Male	PharmD	Not identified	Not identified	Not identified	Not identified	Not identified	Not identified	Identified	Not identified	Not identified	Identified	Not identified	Not identified	Not identified	Not identified	Not identified	Identified	0	1	0	0	0	OR
5092	Male	BS	Not identified	Not identified	Not identified	Not identified	Not identified	Not identified	Identified	Not identified	Not identified	Not identified	Identified	Not identified	Not identified	Not identified	Identified	Not identified	0	0	0	1	0	WV
4304	Female	BS	Not identified	Not identified	Not identified	Not identified	Not identified	Not identified	Identified	Not identified	Not identified	Not identified	Not identified	Not identified	Identified	Not identified	Not identified	Not identified	0	1	0	0	0	CA
5055	Female	BS	Not identified	Not identified	Not identified	Not identified	Not identified	Not identified	Identified	Not identified	Not identified	Not identified	Not identified	Not identified	Identified	Not identified	Not identified	Not identified	1	1	0	0	1	WV
5304	Male	BS	Not identified	Not identified	Not identified	Not identified	Not identified	Not identified	Not identified	Not identified	Not identified	Not identified	Not identified	Not identified	Not identified	Identified	Not identified	Not identified						WV
1063	Female	PharmD	Identified	Not identified	Identified	Not identified	Not identified	Not identified	Not identified	Not identified	Not identified	Not identified	Identified	Not identified	Not identified	Not identified	Not identified	Identified	0	1	0	0	0	ND
2009	Female	BS	Not identified	Not identified	Not identified	Not identified	Not identified	Not identified	Not identified	Not identified	Not identified	Not identified	Not identified	Not identified	Identified	Not identified	Not identified	Not identified	0	1	1	1	0	SD
4158	Male	PharmD	Identified	Not identified	Identified	Not identified	Not identified	Not identified	Identified	Not identified	Not identified	Not identified	Not identified	Identified	Identified	Not identified	Not identified	Not identified	0	1	1	0	0	CA
5259	Male	PharmD	Identified	Identified	Identified	Identified	Not identified	Not identified	Not identified	Not identified	Not identified	Identified	Not identified	Not identified	Identified	Not identified	Not identified	Not identified	1	1	1	0	1	WV
4290	Male	BS	Not identified	Not identified	Not identified	Not identified	Not identified	Not identified	Identified	Not identified	Not identified	Identified	Not identified	Not identified	Not identified	Not identified	Identified	Not identified	0	1	1	0	0	CA
5188	Female	PharmD	Identified	Not identified	Not identified	Not identified	Not identified	Not identified	Not identified	Not identified	Not identified	Identified	Not identified	Not identified	Identified	Not identified	Not identified	Not identified	0	1	0	0	1	WV
1022	Male	PharmD	Identified	Identified	Identified	Not identified	Not identified	Not identified	Not identified	Not identified	Not identified	Identified	Not identified	Not identified	Identified	Not identified	Not identified	Not identified	0	1	1	1	1	ND
4234	Male	BS	Not identified	Not identified	Not identified	Not identified	Not identified	Not identified	Identified	Not identified	Not identified	Identified	Not identified	Not identified	Identified	Not identified	Not identified	Not identified	0	1	0	0	0	CA
2097	Male	BS	Identified	Identified	Not identified	Not identified	Not identified	Not identified	Not identified	Not identified	Not identified	Not identified	Not identified	Not identified	Identified	Not identified	Not identified	Not identified	0	1	0	0	1	SD
5011	Male	BS	Not identified	Not identified	Not identified	Not identified	Not identified	Not identified	Not identified	Identified	Not identified	Not identified	Not identified	Not identified	Identified	Not identified	Not identified	Not identified	0	1	0	0	0	WV
5469	Female	BS	Not identified	Not identified	Not identified	Not identified	Not identified	Not identified	Not identified	Not identified	Not identified	Identified	Not identified	Not identified	Not identified	Not identified	Not identified	Identified	1	1	1	0	1	WV
2086	Female	PharmD	Identified	Not identified	Not identified	Not identified	Not identified	Not identified	Not identified	Not identified	Not identified	Identified	Not identified	Not identified	Identified	Not identified	Not identified	Not identified	0	1	0	1	1	SD
5509	Male	BS	Not identified	Not identified	Not identified	Not identified	Not identified	Not identified	Not identified	Not identified	Not identified	Not identified	Not identified	Not identified	Not identified	Not identified	Not identified	Identified	1	1	0	0	0	WV
1133	Male	BS	Not identified	Not identified	Not identified	Not identified	Not identified	Not identified	Identified	Not identified	Not identified	Not identified	Not identified	Not identified	Not identified	Not identified	Not identified	Identified	0	1	0	0	0	ND
1003	Female	PharmD	Not identified	Not identified	Not identified	Not identified	Not identified	Not identified	Identified	Not identified	Not identified	Identified	Not identified	Not identified	Not identified	Not identified	Identified	Not identified	0	0	0	0	0	ND
5428	Male	BS	Not identified	Not identified	Not identified	Not identified	Not identified	Not identified	Not identified	Not identified	Not identified	Not identified	Not identified	Not identified	Identified	Not identified	Not identified	Not identified	0	1	0	0	1	WV
5103	Female	BS	Identified	Not identified	Identified	Not identified	Not identified	Not identified	Identified	Not identified	Not identified	Not identified	Not identified	Identified	Not identified	Not identified	Not identified	Identified	0	1	0	0	1	WV
5387	Female	PharmD	Not identified	Not identified	Not identified	Not identified	Not identified	Not identified	Identified	Not identified	Not identified	Identified	Not identified	Not identified	Not identified	Not identified	Not identified	Identified	1	1	1	0	1	WV
4080	Male	PharmD	Identified	Not identified	Not identified	Not identified	Not identified	Not identified	Identified	Not identified	Not identified	Not identified	Not identified	Not identified	Identified	Not identified	Not identified	Not identified	0	1	0	1	1	CA
5167	Female	BS	Not identified	Not identified	Not identified	Not identified	Not identified	Not identified	Not identified	Not identified	Not identified	Identified	Not identified	Not identified	Not identified	Not identified	Not identified	Identified	0	0	1	0	0	WV
2078	Female	PharmD	Not identified	Not identified	Not identified	Not identified	Not identified	Not identified	Not identified	Not identified	Not identified	Identified	Not identified	Not identified	Not identified	Not identified	Not identified	Identified	0	1	0	1	1	SD
2121	Female	PharmD	Not identified	Not identified	Not identified	Identified	Not identified	Not identified	Not identified	Not identified	Not identified	Not identified	Not identified	Identified	Identified	Not identified	Not identified	Not identified	0	1	0	1	1	SD
5465	Female	BS	Not identified	Not identified	Not identified	Not identified	Not identified	Not identified	Not identified	Not identified	Identified	Identified	Not identified	Not identified	Identified	Not identified	Not identified	Not identified	0	1	1	0	0	WV
4200	Male	BS	Not identified	Not identified	Not identified	Not identified	Not identified	Not identified	Not identified	Not identified	Not identified	Identified	Not identified	Not identified	Not identified	Not identified	Not identified	Identified	0	1	0	0	0	CA
5282	Male	PharmD	Not identified	Not identified	Not identified	Not identified	Not identified	Not identified	Identified	Not identified	Not identified	Not identified	Not identified	Not identified	Not identified	Not identified	Not identified	Identified	0	1	1	0	1	WV
5265	Female	BS	Not identified	Not identified	Not identified	Not identified	Not identified	Not identified	Not identified	Not identified	Not identified	Not identified	Not identified	Not identified	Not identified	Not identified	Identified	Not identified	1	1	0	0	0	WV
5297	Male	BS	Identified	Identified	Not identified	Not identified	Not identified	Not identified	Not identified	Not identified	Not identified	Identified	Not identified	Not identified	Identified	Not identified	Not identified	Not identified	0	1	1	0	1	WV
1155	Female	PharmD	Not identified	Not identified	Not identified	Not identified	Not identified	Not identified	Not identified	Not identified	Not identified	Identified	Not identified	Not identified	Identified	Not identified	Not identified	Not identified	0	1	0	0	0	ND
5087	Male	BS	Identified	Identified	Not identified	Not identified	Not identified	Not identified	Not identified	Not identified	Not identified	Not identified	Not identified	Not identified	Not identified	Not identified	Identified	Not identified	1	1	1	1	1	WV
2090	Male	BS	Not identified	Not identified	Not identified	Not identified	Not identified	Not identified	Identified	Not identified	Not identified	Identified	Identified	Identified	Not identified	Identified	Not identified	Not identified	0	1	0	0	0	SD
5481	Male	BS	Identified	Identified	Not identified	Identified	Not identified	Not identified	Not identified	Not identified	Not identified	Not identified	Not identified	Not identified	Identified	Not identified	Not identified	Not identified	1	1	1	0	1	WV
4083	Male	PharmD	Not identified	Not identified	Not identified	Not identified	Not identified	Not identified	Not identified	Not identified	Not identified	Identified	Not identified	Not identified	Not identified	Not identified	Not identified	Identified	0	1	0	0	0	CA
4155	Female	PharmD	Not identified	Not identified	Not identified	Not identified	Not identified	Not identified	Not identified	Not identified	Not identified	Not identified	Not identified	Not identified	Not identified	Not identified	Not identified	Identified	1	1	0	0	0	CA
5501	Female	BS	Identified	Not identified	Not identified	Not identified	Not identified	Not identified	Identified	Not identified	Not identified	Identified	Not identified	Identified	Identified	Not identified	Not identified	Not identified	1	1	0	1	0	WV
1107	Female	PharmD	Identified	Not identified	Not identified	Not identified	Not identified	Not identified	Not identified	Not identified	Not identified	Not identified	Not identified	Not identified	Identified	Not identified	Not identified	Not identified	0	1	0	0	1	ND
2084	Female	BS	Identified	Not identified	Not identified	Not identified	Not identified	Not identified	Not identified	Not identified	Not identified	Identified	Not identified	Not identified	Not identified	Not identified	Not identified	Identified	0	1	0	1	1	SD
4202	Female	PharmD	Not identified	Not identified	Not identified	Not identified	Not identified	Not identified	Identified	Not identified	Not identified	Identified	Not identified	Not identified	Not identified	Identified	Not identified	Not identified	0	1	0	0	0	CA
5425	Female	PharmD	Identified	Not identified	Not identified	Identified	Not identified	Not identified	Identified	Not identified	Not identified	Identified	Not identified	Not identified	Not identified	Identified	Not identified	Not identified	0	1	0	1	0	WV
1004	Female	PharmD	Not identified	Not identified	Identified	Not identified	Not identified	Not identified	Not identified	Not identified	Not identified	Not identified	Not identified	Not identified	Identified	Not identified	Not identified	Not identified	0	1	0	1	0	ND
5254	Male	PharmD	Not identified	Not identified	Not identified	Not identified	Not identified	Not identified	Not identified	Not identified	Not identified	Not identified	Not identified	Not identified	Not identified	Not identified	Not identified	Identified	0	1	1	0	1	WV
4195	Male	PharmD	Identified	Not identified	Not identified	Not identified	Not identified	Not identified	Not identified	Not identified	Not identified	Not identified	Not identified	Identified	Identified	Not identified	Not identified	Not identified	1	1	1	0	0	CA
4143	Male	BS	Identified	Not identified	Not identified	Not identified	Not identified	Not identified	Identified	Not identified	Not identified	Identified	Not identified	Not identified	Not identified	Not identified	Identified	Not identified	0	1	0	0	0	OR
1053	Male	PharmD	Identified	Identified	Not identified	Not identified	Not identified	Not identified	Not identified	Not identified	Not identified	Not identified	Not identified	Not identified	Not identified	Not identified	Not identified	Identified	0	1	0	0	0	ND
2139	Female	PharmD	Identified	Identified	Not identified	Not identified	Not identified	Not identified	Not identified	Not identified	Identified	Not identified	Not identified	Not identified	Not identified	Identified	Not identified	Not identified	0	1	1	0	0	SD
4297	Female	PharmD	Identified	Not identified	Identified	Not identified	Not identified	Not identified	Not identified	Identified	Not identified	Not identified	Not identified	Not identified	Identified	Not identified	Not identified	Not identified	0	1	0	0	0	CA
4289	Female	PharmD	Identified	Identified	Not identified	Not identified	Not identified	Not identified	Identified	Not identified	Not identified	Not identified	Not identified	Not identified	Not identified	Not identified	Identified	Not identified	1	1	1	0	0	CA
5101	Female	PharmD	Identified	Not identified	Not identified	Not identified	Not identified	Not identified	Identified	Identified	Not identified	Not identified	Not identified	Not identified	Not identified	Not identified	Identified	Not identified	0	1	1	0	0	WV
5155	Female	BS	Identified	Not identified	Not identified	Not identified	Not identified	Not identified	Not identified	Not identified	Not identified	Not identified	Not identified	Not identified	Not identified	Identified	Not identified	Not identified	0	1	0	0	0	WV
4001	Female	BS	Identified	Identified	Not identified	Not identified	Not identified	Not identified	Not identified	Not identified	Not identified	Identified	Not identified	Not identified	Not identified	Not identified	Identified	Not identified	0	1	0	1	1	CA
5351	Male	BS	Not identified	Not identified	Not identified	Not identified	Not identified	Not identified	Not identified	Not identified	Not identified	Identified	Not identified	Not identified	Not identified	Not identified	Identified	Not identified	0	1	0	0	0	WV
1073	Female	PharmD	Not identified	Not identified	Not identified	Not identified	Not identified	Not identified	Not identified	Not identified	Not identified	Identified	Not identified	Not identified	Identified	Not identified	Not identified	Not identified	0	1	1	1	1	ND
5409	Female	PharmD	Not identified	Not identified	Not identified	Identified	Not identified	Not identified	Identified	Not identified	Not identified	Identified	Not identified	Not identified	Not identified	Identified	Not identified	Not identified	1	1	1	0	0	WV
1061	Female	BS	Not identified	Not identified	Not identified	Not identified	Not identified	Not identified	Not identified	Not identified	Not identified	Not identified	Not identified	Not identified	Not identified	Identified	Not identified	Not identified	0	1	0	0	1	ND
5498	Male	PharmD	Not identified	Not identified	Not identified	Not identified	Not identified	Not identified	Identified	Not identified	Not identified	Identified	Not identified	Not identified	Identified	Not identified	Not identified	Not identified	0	1	1	1	1	WV
5046	Female	BS	Identified	Not identified	Not identified	Not identified	Not identified	Not identified	Not identified	Not identified	Not identified	Identified	Not identified	Not identified	Not identified	Not identified	Not identified	Identified	0	1	0			WV
5122	Male	BS	Not identified	Not identified	Not identified	Not identified	Not identified	Not identified	Not identified	Not identified	Not identified	Identified	Not identified	Not identified	Not identified	Identified	Not identified	Not identified	0	1	0	0	0	WV
4097	Female	BS	Identified	Identified	Identified	Not identified	Not identified	Not identified	Not identified	Not identified	Not identified	Not identified	Not identified	Not identified	Not identified	Not identified	Not identified	Identified	0	1	0	0	0	OR
4028	Male	PharmD	Identified	Identified	Not identified	Not identified	Not identified	Not identified	Not identified	Not identified	Not identified	Identified	Not identified	Not identified	Identified	Not identified	Not identified	Not identified	0	1	0	0	0	CA
5180	Male	PharmD	Not identified	Not identified	Not identified	Not identified	Not identified	Not identified	Not identified	Not identified	Not identified	Identified	Not identified	Not identified	Identified	Not identified	Not identified	Not identified	0	1	1	0	1	WV
5255	Female	PharmD	Identified	Not identified	Identified	Not identified	Not identified	Not identified	Identified	Not identified	Not identified	Not identified	Not identified	Not identified	Not identified	Not identified	Not identified	Identified	0	1	0	0	0	WV
5191	Female	BS	Identified	Not identified	Identified	Not identified	Not identified	Not identified	Not identified	Not identified	Not identified	Not identified	Not identified	Not identified	Not identified	Identified	Not identified	Not identified	0	1	1	1	1	WV
1143	Female	BS	Not identified	Not identified	Not identified	Not identified	Not identified	Not identified	Not identified	Not identified	Not identified	Not identified	Not identified	Not identified	Not identified	Not identified	Identified	Not identified	0	1	1	0	0	ND
2058	Female	PharmD	Not identified	Not identified	Not identified	Not identified	Not identified	Not identified	Not identified	Not identified	Not identified	Identified	Not identified	Not identified	Identified	Not identified	Not identified	Not identified	0	1	0	0	1	SD
5343	Male	PharmD	Not identified	Not identified	Not identified	Not identified	Not identified	Not identified	Not identified	Not identified	Not identified	Not identified	Not identified	Not identified	Not identified	Not identified	Not identified	Identified	0	1	1	0	0	WV
5220	Male	PharmD	Not identified	Not identified	Identified	Not identified	Not identified	Not identified	Not identified	Not identified	Not identified	Not identified	Not identified	Not identified	Identified	Not identified	Not identified	Not identified	0	1	1	1	0	WV
1149	Male	PharmD	Identified	Not identified	Not identified	Not identified	Not identified	Not identified	Not identified	Not identified	Not identified	Not identified	Not identified	Not identified	Identified	Not identified	Not identified	Not identified	0	1	1	0	1	ND
4084	Female	PharmD	Identified	Identified	Identified	Not identified	Not identified	Not identified	Not identified	Identified	Not identified	Not identified	Not identified	Not identified	Not identified	Identified	Not identified	Not identified	0	1	1	1	1	CA
5483	Male	PharmD	Identified	Identified	Identified	Not identified	Not identified	Not identified	Not identified	Not identified	Not identified	Not identified	Not identified	Not identified	Identified	Not identified	Not identified	Not identified	0	1	0	0	0	WV
5310	Female	PharmD	Not identified	Not identified	Not identified	Not identified	Not identified	Not identified	Identified	Not identified	Not identified	Identified	Not identified	Not identified	Not identified	Not identified	Not identified	Identified	0	1	1	0	1	WV
2092	Female	BS	Not identified	Not identified	Not identified	Not identified	Not identified	Not identified	Not identified	Not identified	Not identified	Not identified	Not identified	Not identified	Not identified	Not identified	Not identified	Identified	0	1	0	1	0	SD
5022	Female	BS	Not identified	Not identified	Not identified	Not identified	Not identified	Not identified	Identified	Not identified	Not identified	Identified	Not identified	Not identified	Not identified	Not identified	Identified	Not identified	0	1	1	0	1	WV
5437	Female	BS	Identified	Not identified	Not identified	Not identified	Not identified	Not identified	Not identified	Identified	Not identified	Not identified	Not identified	Not identified	Not identified	Not identified	Not identified	Not identified	0	1	1	0	0	WV
4130	Male	BS	Not identified	Not identified	Not identified	Not identified	Not identified	Not identified	Not identified	Not identified	Not identified	Identified	Not identified	Not identified	Not identified	Identified	Not identified	Not identified	0	1	1	0	1	OR
5298	Female	PharmD	Not identified	Not identified	Not identified	Not identified	Not identified	Not identified	Not identified	Not identified	Not identified	Not identified	Not identified	Not identified	Not identified	Identified	Not identified	Not identified	0	1	0	0	0	WV
5506	Female	PharmD	Not identified	Not identified	Not identified	Not identified	Not identified	Not identified	Not identified	Not identified	Not identified	Identified	Not identified	Not identified	Identified	Not identified	Not identified	Not identified	0	1	0	0	0	WV
5160	Male	BS	Not identified	Not identified	Not identified	Not identified	Not identified	Not identified	Identified	Not identified	Not identified	Identified	Not identified	Identified	Identified	Not identified	Not identified	Not identified	1	1	0	0	0	WV
5004	Male	PharmD	Not identified	Not identified	Not identified	Not identified	Not identified	Not identified	Identified	Not identified	Not identified	Identified	Not identified	Not identified	Identified	Not identified	Not identified	Not identified	1	1	0	0	1	WV
5453	Female	PharmD	Not identified	Not identified	Not identified	Not identified	Not identified	Not identified	Not identified	Not identified	Not identified	Not identified	Not identified	Not identified	Not identified	Not identified	Not identified	Identified	1	1	1	1	1	WV
4135	Male	BS	Not identified	Not identified	Not identified	Not identified	Not identified	Not identified	Identified	Not identified	Not identified	Not identified	Not identified	Not identified	Not identified	Identified	Not identified	Not identified	0	0	0	1	1	OR
1044	Male	PharmD	Not identified	Not identified	Not identified	Not identified	Not identified	Not identified	Identified	Not identified	Not identified	Identified	Not identified	Not identified	Identified	Not identified	Not identified	Not identified	0	1	0	1	1	ND
4291	Male	PharmD	Identified	Not identified	Not identified	Not identified	Not identified	Not identified	Not identified	Not identified	Not identified	Identified	Identified	Not identified	Identified	Not identified	Not identified	Not identified	0	1	1	1	0	CA
5136	Female	PharmD	Identified	Not identified	Not identified	Not identified	Not identified	Not identified	Not identified	Not identified	Not identified	Not identified	Not identified	Identified	Identified	Not identified	Not identified	Not identified	0	1	1	1	1	WV
5137	Male	PharmD	Identified	Not identified	Not identified	Not identified	Not identified	Not identified	Not identified	Identified	Not identified	Not identified	Not identified	Not identified	Identified	Not identified	Not identified	Not identified	0	1	0	1	0	WV
1087	Male	BS	Not identified	Not identified	Not identified	Not identified	Not identified	Not identified	Not identified	Not identified	Not identified	Not identified	Not identified	Not identified	Not identified	Identified	Not identified	Not identified	0	1	0	0	1	ND
5342	Female	BS	Identified	Not identified	Identified	Not identified	Not identified	Not identified	Not identified	Not identified	Not identified	Identified	Not identified	Not identified	Not identified	Not identified	Not identified	Identified	0	1	1	0	0	WV
4078	Male	PharmD	Not identified	Not identified	Not identified	Not identified	Not identified	Not identified	Not identified	Not identified	Not identified	Not identified	Not identified	Not identified	Not identified	Not identified	Not identified	Not identified	0	1	0	0	1	CA
5078	Male	PharmD	Identified	Identified	Not identified	Not identified	Not identified	Not identified	Not identified	Not identified	Not identified	Identified	Not identified	Not identified	Not identified	Not identified	Not identified	Identified						WV
2115	Female	PharmD	Identified	Not identified	Not identified	Not identified	Not identified	Not identified	Identified	Not identified	Not identified	Not identified	Not identified	Not identified	Not identified	Not identified	Not identified	Identified	0	1	0	1	0	SD
4032	Male	PharmD	Identified	Not identified	Not identified	Not identified	Not identified	Not identified	Not identified	Not identified	Not identified	Identified	Not identified	Not identified	Not identified	Identified	Not identified	Not identified	0	1	1	1	1	CA
2108	Male	PharmD	Not identified	Not identified	Not identified	Not identified	Not identified	Not identified	Not identified	Not identified	Not identified	Not identified	Not identified	Not identified	Identified	Not identified	Not identified	Not identified	0	1	0	0	0	SD
4013	Male	PharmD	Identified	Not identified	Not identified	Not identified	Not identified	Not identified	Not identified	Not identified	Not identified	Not identified	Not identified	Not identified	Identified	Not identified	Not identified	Not identified	0	1	0	0	0	CA
4016	Male	PharmD	Identified	Not identified	Not identified	Not identified	Not identified	Not identified	Not identified	Not identified	Not identified	Not identified	Not identified	Not identified	Identified	Not identified	Not identified	Not identified	1	1	0	1	1	CA
5309	Male	PharmD	Not identified	Not identified	Not identified	Not identified	Not identified	Not identified	Identified	Not identified	Not identified	Not identified	Not identified	Not identified	Identified	Not identified	Not identified	Not identified	0	1	0	1	1	WV
5496	Male	BS	Identified	Not identified	Identified	Not identified	Not identified	Not identified	Not identified	Not identified	Not identified	Identified	Not identified	Not identified	Identified	Not identified	Not identified	Not identified	0	1	0	0	0	WV
5263	Male	PharmD	Identified	Identified	Not identified	Not identified	Not identified	Not identified	Identified	Not identified	Not identified	Identified	Not identified	Not identified	Not identified	Not identified	Not identified	Identified	0	1	0	0	0	WV
5275	Male	BS	Not identified	Not identified	Not identified	Not identified	Not identified	Not identified	Not identified	Not identified	Not identified	Not identified	Not identified	Not identified	Identified	Not identified	Not identified	Not identified	0	1	1	1	1	WV
5366	Female	PharmD	Not identified	Not identified	Not identified	Not identified	Not identified	Not identified	Not identified	Not identified	Not identified	Identified	Not identified	Not identified	Not identified	Identified	Not identified	Not identified	0	1	0	0	0	WV
5513	Female	BS	Not identified	Not identified	Not identified	Not identified	Not identified	Not identified	Not identified	Not identified	Not identified	Identified	Not identified	Identified	Not identified	Not identified	Not identified	Identified	0	1	0	1	0	WV
2161	Female	PharmD	Not identified	Not identified	Not identified	Not identified	Not identified	Not identified	Not identified	Not identified	Not identified	Not identified	Not identified	Not identified	Identified	Not identified	Not identified	Not identified	0	1	0	0	0	SD
2111	Female	PharmD	Not identified	Not identified	Not identified	Not identified	Not identified	Not identified	Not identified	Not identified	Not identified	Not identified	Not identified	Not identified	Not identified	Not identified	Identified	Not identified	0	1	0	1	1	SD
2151	Male	PharmD	Not identified	Not identified	Not identified	Not identified	Not identified	Not identified	Not identified	Not identified	Not identified	Identified	Not identified	Not identified	Identified	Not identified	Not identified	Not identified	0	1	0	0	1	SD
5277	Female	BS	Not identified	Not identified	Not identified	Not identified	Not identified	Not identified	Identified	Not identified	Not identified	Identified	Not identified	Not identified	Not identified	Not identified	Not identified	Identified	1	1	1	0	1	WV
2041	Female	PharmD	Identified	Not identified	Identified	Not identified	Not identified	Not identified	Identified	Not identified	Not identified	Not identified	Not identified	Not identified	Not identified	Not identified	Not identified	Identified	0	1	0	0	0	SD
5294	Female	BS	Identified	Identified	Not identified	Not identified	Not identified	Not identified	Not identified	Not identified	Not identified	Not identified	Not identified	Not identified	Not identified	Identified	Not identified	Not identified	1	1	1	0	1	WV
5231	Male	BS	Not identified	Not identified	Not identified	Not identified	Not identified	Not identified	Not identified	Not identified	Not identified	Identified	Not identified	Not identified	Identified	Not identified	Not identified	Not identified	0	1	1	0	1	WV
5200	Female	BS	Not identified	Not identified	Not identified	Not identified	Not identified	Not identified	Not identified	Not identified	Not identified	Identified	Not identified	Not identified	Not identified	Identified	Not identified	Not identified	0	1	0	0	0	WV
5105	Male	BS	Identified	Not identified	Not identified	Not identified	Not identified	Not identified	Not identified	Not identified	Not identified	Identified	Not identified	Not identified	Identified	Not identified	Not identified	Not identified	0	1	1	1	1	WV
5451	Female	BS	Not identified	Not identified	Not identified	Not identified	Not identified	Not identified	Identified	Not identified	Not identified	Identified	Not identified	Not identified	Not identified	Not identified	Not identified	Identified	0	1	1	0	1	WV
1059	Male	BS	Not identified	Not identified	Not identified	Not identified	Not identified	Not identified	Not identified	Not identified	Not identified	Not identified	Not identified	Not identified	Not identified	Identified	Not identified	Not identified	0	1	0	0	1	ND
4046	Female	PharmD	Not identified	Not identified	Not identified	Not identified	Identified	Identified	Identified	Not identified	Not identified	Identified	Not identified	Not identified	Not identified	Not identified	Not identified	Identified	1	1	1	0	0	OR
2011	Male	BS	Not identified	Not identified	Not identified	Not identified	Not identified	Not identified	Not identified	Not identified	Not identified	Identified	Not identified	Not identified	Identified	Not identified	Not identified	Not identified	1	1	1	0	1	SD
5138	Male	PharmD	Not identified	Not identified	Not identified	Not identified	Not identified	Not identified	Not identified	Not identified	Not identified	Identified	Not identified	Not identified	Identified	Not identified	Not identified	Not identified	0	1	1	0	1	WV
2116	Female	PharmD	Identified	Not identified	Not identified	Not identified	Not identified	Not identified	Not identified	Not identified	Not identified	Identified	Not identified	Not identified	Identified	Not identified	Not identified	Not identified	0	1	1	1	0	SD
5133	Male	BS	Identified	Not identified	Not identified	Not identified	Not identified	Not identified	Identified	Not identified	Not identified	Not identified	Not identified	Not identified	Not identified	Not identified	Not identified	Identified	0	1	0	0	1	WV
5412	Male	PharmD	Not identified	Not identified	Not identified	Not identified	Not identified	Not identified	Not identified	Not identified	Not identified	Not identified	Not identified	Not identified	Not identified	Not identified	Not identified	Identified	0	1	1	0	1	WV
4131	Male	BS	Not identified	Not identified	Not identified	Not identified	Not identified	Not identified	Not identified	Not identified	Not identified	Not identified	Not identified	Not identified	Identified	Not identified	Not identified	Not identified	0	1	0	0	1	OR
2134	Male	BS	Not identified	Not identified	Not identified	Not identified	Not identified	Not identified	Not identified	Not identified	Not identified	Not identified	Not identified	Not identified	Identified	Not identified	Not identified	Not identified	0	0	0	0	0	SD
5021	Male	BS	Not identified	Not identified	Not identified	Identified	Not identified	Not identified	Not identified	Identified	Not identified	Not identified	Not identified	Not identified	Not identified	Not identified	Identified	Not identified	0	1	0	0	1	WV
5073	Male	BS													Not identified	Not identified	Not identified	Identified						WV
2164	Female	BS	Not identified	Not identified	Not identified	Not identified	Not identified	Not identified	Identified	Not identified	Not identified	Identified	Not identified	Not identified	Not identified	Not identified	Identified	Not identified	0	1	1	0	0	SD
2012	Male	PharmD	Not identified	Not identified	Not identified	Not identified	Not identified	Not identified	Not identified	Not identified	Not identified	Identified	Not identified	Not identified	Not identified	Identified	Not identified	Not identified	1	1	0	1	0	SD
2160	Male	PharmD	Not identified	Not identified	Not identified	Not identified	Not identified	Not identified	Identified	Not identified	Not identified	Identified	Not identified	Not identified	Not identified	Not identified	Not identified	Identified	0	1	0	0	0	SD
1109	Male	PharmD	Not identified	Not identified	Not identified	Not identified	Not identified	Not identified	Identified	Not identified	Not identified	Identified	Not identified	Not identified	Identified	Not identified	Not identified	Not identified	0	1	0	1	1	ND
5242	Male	PharmD	Identified	Identified	Not identified	Not identified	Not identified	Not identified	Not identified	Not identified	Not identified	Not identified	Not identified	Not identified	Not identified	Not identified	Identified	Not identified	1	1	0	0	0	WV
4159	Male	PharmD	Identified	Not identified	Not identified	Not identified	Not identified	Not identified	Not identified	Identified	Not identified	Not identified	Not identified	Not identified	Identified	Not identified	Not identified	Not identified	1	1	1	1	1	CA
1127	Male	BS	Not identified	Identified	Identified	Not identified	Not identified	Not identified	Not identified	Not identified	Not identified	Not identified	Not identified	Not identified	Not identified	Not identified	Identified	Not identified	0	1	0	0	0	ND
2075	Female	PharmD	Not identified	Not identified	Not identified	Not identified	Not identified	Not identified	Not identified	Not identified	Not identified	Identified	Not identified	Not identified	Not identified	Identified	Not identified	Not identified	0	1	0	1	1	SD
4132	Female	PharmD	Identified	Not identified	Not identified	Not identified	Not identified	Not identified	Not identified	Not identified	Not identified	Not identified	Not identified	Not identified	Not identified	Not identified	Identified	Not identified	0	1	0	0	1	OR
5065	Male	BS	Not identified	Not identified	Not identified	Not identified	Not identified	Not identified	Not identified	Not identified	Not identified	Identified	Not identified	Not identified	Not identified	Not identified	Identified	Not identified	1	1	0	0	0	WV
1069	Male	PharmD	Identified	Not identified	Not identified	Not identified	Not identified	Not identified	Not identified	Not identified	Not identified	Not identified	Not identified	Not identified	Identified	Not identified	Not identified	Not identified	0	1	0	0	0	ND
4060	Male	PharmD	Not identified	Not identified	Not identified	Not identified	Not identified	Not identified	Not identified	Not identified	Not identified	Identified	Not identified	Not identified	Not identified	Identified	Not identified	Not identified	1	1	0	1	1	OR
5388	Male	BS	Not identified	Not identified	Not identified	Not identified	Not identified	Not identified	Not identified	Not identified	Not identified	Not identified	Not identified	Not identified	Not identified	Identified	Not identified	Not identified	0	1	1	0	1	WV
5107	Male	BS	Identified	Not identified	Not identified	Not identified	Not identified	Not identified	Not identified	Not identified	Not identified	Not identified	Not identified	Not identified	Not identified	Not identified	Identified	Not identified	0	1	0	0	1	WV
5068	Female	BS	Not identified	Not identified	Not identified	Not identified	Not identified	Not identified	Not identified	Not identified	Not identified	Not identified	Not identified	Not identified	Not identified	Not identified	Not identified	Identified						WV
2114	Male	BS	Not identified	Not identified	Not identified	Not identified	Not identified	Not identified	Not identified	Not identified	Not identified	Not identified	Not identified	Not identified	Not identified	Not identified	Identified	Not identified	0	0	0	0	1	SD
5395	Female	BS	Identified	Not identified	Not identified	Not identified	Not identified	Not identified	Not identified	Not identified	Not identified	Not identified	Not identified	Not identified	Not identified	Not identified	Not identified	Identified	0	1	1	0	1	WV
5460	Male	PharmD	Not identified	Not identified	Identified	Not identified	Not identified	Not identified	Not identified	Not identified	Not identified	Identified	Not identified	Not identified	Identified	Not identified	Not identified	Not identified	0	1	0	0	0	WV
5457	Female	PharmD	Identified	Not identified	Not identified	Not identified	Not identified	Not identified	Not identified	Not identified	Not identified	Not identified	Not identified	Not identified	Identified	Not identified	Not identified	Not identified	0	1	1	0	1	WV
5036	Male	PharmD	Identified	Identified	Not identified	Not identified	Not identified	Not identified	Not identified	Not identified	Not identified	Identified	Not identified	Not identified	Not identified	Identified	Not identified	Not identified	0	1	0	1	1	WV
2029	Female	PharmD	Not identified	Not identified	Not identified	Not identified	Not identified	Not identified	Identified	Identified	Not identified	Identified	Not identified	Not identified	Identified	Not identified	Not identified	Not identified	0	1	0	0	0	SD
1146	Male	PharmD	Not identified	Not identified	Not identified	Not identified	Not identified	Not identified	Not identified	Not identified	Not identified	Not identified	Not identified	Not identified	Not identified	Not identified	Not identified	Identified	0	1	1	1	0	ND
5229	Male	BS	Not identified	Not identified	Not identified	Not identified	Not identified	Not identified	Not identified	Not identified	Not identified	Identified	Not identified	Not identified	Not identified	Not identified	Identified	Not identified	1	1	1	1	1	WV
5474	Female	PharmD	Identified	Identified	Not identified	Not identified	Not identified	Not identified	Identified	Not identified	Not identified	Identified	Not identified	Not identified	Identified	Not identified	Not identified	Not identified	0	1	1	0	0	WV
5247	Male	BS	Identified	Identified	Identified	Identified	Not identified	Not identified	Not identified	Not identified	Not identified	Identified	Not identified	Not identified	Not identified	Identified	Not identified	Not identified	1	1	1	1	0	WV
5461	Female	PharmD	Not identified	Not identified	Not identified	Not identified	Not identified	Not identified	Not identified	Not identified	Not identified	Identified	Not identified	Not identified	Not identified	Identified	Not identified	Not identified	0	1	1	1	1	WV
2032	Female	PharmD	Not identified	Not identified	Not identified	Not identified	Not identified	Not identified	Not identified	Identified	Not identified	Not identified	Not identified	Not identified	Not identified	Not identified	Identified	Not identified	0	1	0	0	1	SD
5125	Female	BS	Identified	Not identified	Not identified	Not identified	Not identified	Not identified	Identified	Not identified	Not identified	Not identified	Not identified	Not identified	Not identified	Not identified	Identified	Not identified	0	1	1	0	1	WV
5114	Female	BS	Not identified	Not identified	Not identified	Not identified	Not identified	Not identified	Not identified	Not identified	Not identified	Not identified	Not identified	Not identified	Identified	Not identified	Not identified	Not identified						WV
2177	Female	PharmD	Identified	Identified	Identified	Not identified	Not identified	Not identified	Not identified	Not identified	Not identified	Not identified	Not identified	Not identified	Not identified	Not identified	Identified	Not identified	0	1	0	0	0	SD
5271	Female	PharmD	Identified	Not identified	Identified	Not identified	Not identified	Not identified	Not identified	Not identified	Not identified	Not identified	Not identified	Not identified	Not identified	Not identified	Not identified	Identified	0	1	1	1	1	WV
4019	Female	BS	Identified	Identified	Not identified	Identified	Not identified	Not identified	Not identified	Not identified	Not identified	Not identified	Not identified	Not identified	Identified	Not identified	Not identified	Not identified	0	1	0	1	1	CA
5051	Female	PharmD	Not identified	Not identified	Not identified	Not identified	Not identified	Not identified	Identified	Not identified	Not identified	Identified	Not identified	Not identified	Identified	Not identified	Not identified	Not identified	0	1	1	0	0	WV
5145	Male	BS	Not identified	Not identified	Not identified	Not identified	Not identified	Not identified	Identified	Not identified	Not identified	Not identified	Not identified	Not identified	Not identified	Not identified	Identified	Not identified	1	1	0	0	0	WV
5170	Female	PharmD	Not identified	Not identified	Not identified	Not identified	Not identified	Not identified	Identified	Not identified	Not identified	Not identified	Not identified	Not identified	Identified	Not identified	Not identified	Not identified	0	1	0	0	1	WV
5205	Male	BS	Not identified	Not identified	Not identified	Not identified	Not identified	Not identified	Not identified	Not identified	Not identified	Identified	Not identified	Not identified	Not identified	Not identified	Identified	Not identified	1	1	1	1	1	WV
2142	Male	BS	Not identified	Not identified	Not identified	Not identified	Not identified	Not identified	Not identified	Not identified	Not identified	Identified	Not identified	Not identified	Not identified	Not identified	Identified	Not identified	0	0	0	0	0	SD
1060	Male	BS	Not identified	Not identified	Not identified	Not identified	Not identified	Not identified	Not identified	Not identified	Not identified	Not identified	Identified	Not identified	Identified	Not identified	Not identified	Not identified	0	1	1	0	1	ND
5426	Male	BS	Not identified	Not identified	Not identified	Not identified	Not identified	Not identified	Not identified	Not identified	Not identified	Not identified	Not identified	Not identified	Identified	Not identified	Not identified	Not identified	0	1	0	0	0	WV
4239	Male	PharmD	Not identified	Not identified	Not identified	Not identified	Not identified	Not identified	Identified	Not identified	Not identified	Not identified	Not identified	Not identified	Not identified	Not identified	Not identified	Not identified	0	0	0	0	0	OR
5478	Female	PharmD	Identified	Identified	Not identified	Not identified	Not identified	Not identified	Not identified	Not identified	Not identified	Not identified	Not identified	Not identified	Identified	Not identified	Not identified	Not identified	0	1	0	0	0	WV
5063	Male	BS	Not identified	Not identified	Not identified	Not identified	Not identified	Not identified	Not identified	Not identified	Not identified	Not identified	Not identified	Not identified	Not identified	Not identified	Not identified	Identified	0	1	1	1	1	WV
5413	Male	PharmD	Not identified	Not identified	Not identified	Not identified	Not identified	Not identified	Not identified	Not identified	Not identified	Not identified	Not identified	Not identified	Identified	Not identified	Not identified	Not identified	0	1	0	0	1	WV
4228	Female	BS	Identified	Not identified	Not identified	Not identified	Not identified	Not identified	Identified	Not identified	Not identified	Identified	Not identified	Not identified	Not identified	Not identified	Identified	Not identified	0	1	1	0	0	OR
4012	Female	BS	Not identified	Not identified	Not identified	Not identified	Not identified	Not identified	Not identified	Not identified	Not identified	Identified	Not identified	Not identified	Not identified	Not identified	Not identified	Identified	0	1	0	0	1	CA
4056	Male	BS	Not identified	Not identified	Not identified	Not identified	Not identified	Not identified	Not identified	Not identified	Not identified	Not identified	Not identified	Not identified	Not identified	Not identified	Not identified	Identified	0	0	0	0	0	OR
5323	Male	BS	Not identified	Not identified	Not identified	Not identified	Not identified	Not identified	Identified	Not identified	Not identified	Not identified	Not identified	Not identified	Identified	Not identified	Not identified	Not identified	1	1	1	1	1	WV
5315	Female	PharmD	Identified	Identified	Not identified	Not identified	Not identified	Not identified	Identified	Not identified	Not identified	Not identified	Not identified	Not identified	Not identified	Not identified	Not identified	Identified	1	1	0	0	1	WV
5370	Male	BS	Not identified	Not identified	Not identified	Not identified	Not identified	Not identified	Not identified	Not identified	Not identified	Not identified	Not identified	Not identified	Not identified	Not identified	Not identified	Identified	0	1	0	0	0	WV
2053	Male	BS	Identified	Not identified	Not identified	Not identified	Not identified	Not identified	Not identified	Not identified	Not identified	Not identified	Not identified	Not identified	Not identified	Not identified	Identified	Not identified	0	1	0	0	1	SD
2030	Male	BS	Identified	Not identified	Not identified	Not identified	Not identified	Not identified	Not identified	Not identified	Not identified	Not identified	Not identified	Identified	Not identified	Not identified	Identified	Not identified	0	1	0	0	0	SD
5448	Male	BS	Identified	Identified	Not identified	Not identified	Not identified	Not identified	Not identified	Not identified	Not identified	Identified	Not identified	Not identified	Not identified	Not identified	Not identified	Identified	0	1	0	1	1	WV
5225	Male	BS	Not identified	Not identified	Not identified	Not identified	Not identified	Not identified	Identified	Not identified	Not identified	Not identified	Not identified	Not identified	Not identified	Not identified	Identified	Not identified	1	1	0	0	1	WV
4011	Female	PharmD	Not identified	Not identified	Not identified	Not identified	Not identified	Not identified	Not identified	Identified	Not identified	Not identified	Not identified	Not identified	Not identified	Identified	Not identified	Not identified	1	1	0	0	1	CA
5405	Male	BS	Identified	Not identified	Not identified	Not identified	Not identified	Not identified	Not identified	Not identified	Not identified	Identified	Not identified	Not identified	Not identified	Not identified	Identified	Not identified	1	1	0	0	0	WV
2026	Male	BS	Not identified	Not identified	Not identified	Not identified	Not identified	Not identified	Not identified	Not identified	Not identified	Identified	Not identified	Not identified	Not identified	Identified	Not identified	Not identified	0	1	0	0	0	SD
4214	Male	BS	Not identified	Not identified	Not identified	Not identified	Not identified	Not identified	Identified	Not identified	Not identified	Not identified	Not identified	Not identified	Not identified	Identified	Not identified	Not identified						CA
4029	Female	BS	Identified	Identified	Identified	Not identified	Identified	Identified	Not identified	Not identified	Not identified	Identified	Not identified	Not identified	Not identified	Not identified	Identified	Not identified	1	1	1	0	1	CA
4251	Female	PharmD	Identified	Not identified	Not identified	Not identified	Not identified	Not identified	Not identified	Not identified	Not identified	Not identified	Not identified	Not identified	Identified	Not identified	Not identified	Not identified	1	1	1	1	0	CA
5257	Male	BS	Not identified	Not identified	Not identified	Not identified	Not identified	Not identified	Not identified	Not identified	Not identified	Identified	Not identified	Not identified	Identified	Not identified	Not identified	Not identified	1	1	1	1	0	WV
5430	Male	PharmD	Identified	Not identified	Not identified	Not identified	Not identified	Not identified	Identified	Identified	Not identified	Identified	Not identified	Not identified	Not identified	Not identified	Not identified	Identified	1	1	0	1	0	WV
1130	Male	BS	Not identified	Not identified	Not identified	Not identified	Not identified	Not identified	Not identified	Not identified	Not identified	Not identified	Not identified	Not identified	Identified	Not identified	Not identified	Not identified	0	1	1	1	1	ND
5048	Female	BS	Not identified	Not identified	Identified	Not identified	Not identified	Not identified	Not identified	Not identified	Not identified	Not identified	Not identified	Not identified	Not identified	Not identified	Identified	Not identified	1	1	0	0	1	WV
5335	Male	BS	Not identified	Not identified	Not identified	Not identified	Not identified	Not identified	Identified	Not identified	Not identified	Identified	Not identified	Not identified	Not identified	Not identified	Identified	Not identified	1	1	1	0	0	WV
2024	Female	BS	Identified	Not identified	Not identified	Not identified	Not identified	Not identified	Not identified	Not identified	Not identified	Not identified	Not identified	Not identified	Identified	Not identified	Not identified	Not identified	1	1	0	0	1	SD
4199	Female	PharmD	Not identified	Not identified	Not identified	Identified	Not identified	Not identified	Identified	Identified	Not identified	Identified	Not identified	Not identified	Not identified	Not identified	Identified	Not identified	0	1	0	0	0	CA
5052	Female	PharmD	Not identified	Not identified	Not identified	Not identified	Not identified	Not identified	Identified	Not identified	Not identified	Not identified	Not identified	Not identified	Identified	Not identified	Not identified	Not identified	0	1	0	0	0	WV
5131	Male	PharmD	Identified	Identified	Not identified	Not identified	Not identified	Not identified	Identified	Not identified	Not identified	Identified	Not identified	Not identified	Not identified	Not identified	Identified	Not identified	0	1	1	1	1	WV
2021	Female	PharmD	Identified	Not identified	Not identified	Not identified	Not identified	Not identified	Not identified	Identified	Not identified	Identified	Not identified	Not identified	Identified	Not identified	Not identified	Not identified	0	1	1	0	1	SD
4212	Male	PharmD	Identified	Identified	Not identified	Not identified	Not identified	Not identified	Not identified	Not identified	Not identified	Not identified	Not identified	Not identified	Not identified	Not identified	Not identified	Identified	1	1	0	0	0	CA
1147	Female	BS	Not identified	Not identified	Not identified	Not identified	Not identified	Not identified	Identified	Not identified	Not identified	Identified	Not identified	Not identified	Not identified	Not identified	Not identified	Identified	0	0	0	0	0	ND
5119	Male	PharmD	Not identified	Not identified	Not identified	Not identified	Not identified	Not identified	Not identified	Identified	Not identified	Not identified	Not identified	Not identified	Not identified	Not identified	Identified	Not identified	0	1	0	0	1	WV
2040	Male	PharmD	Not identified	Not identified	Not identified	Not identified	Not identified	Not identified	Not identified	Not identified	Not identified	Identified	Not identified	Not identified	Not identified	Identified	Not identified	Not identified	0	1	0	0	1	SD
5462	Female	PharmD	Not identified	Not identified	Not identified	Not identified	Not identified	Not identified	Not identified	Not identified	Not identified	Not identified	Not identified	Not identified	Not identified	Identified	Not identified	Not identified	0	1	0	1	1	WV
5219	Male	BS	Not identified	Not identified	Not identified	Not identified	Not identified	Not identified	Not identified	Not identified	Not identified	Identified	Not identified	Not identified	Identified	Not identified	Not identified	Not identified	0	1	1	0	1	WV
1105	Male	PharmD	Identified	Not identified	Not identified	Not identified	Not identified	Not identified	Not identified	Not identified	Not identified	Not identified	Not identified	Not identified	Identified	Not identified	Not identified	Not identified	0	1	1	0	0	ND
5143	Male	BS	Not identified	Not identified	Identified	Not identified	Not identified	Not identified	Not identified	Not identified	Not identified	Not identified	Not identified	Not identified	Not identified	Not identified	Not identified	Identified						WV
5213	Male	PharmD	Identified	Identified	Identified	Not identified	Not identified	Not identified	Not identified	Not identified	Not identified	Not identified	Not identified	Not identified	Identified	Not identified	Not identified	Not identified	0	1	1	0	0	WV
4031	Male	PharmD	Not identified	Not identified	Identified	Not identified	Not identified	Not identified	Not identified	Not identified	Not identified	Identified	Not identified	Not identified	Identified	Not identified	Not identified	Not identified	0	1	0	1	1	CA
2171	Female	PharmD	Not identified	Not identified	Not identified	Not identified	Not identified	Not identified	Not identified	Not identified	Not identified	Identified	Not identified	Not identified	Not identified	Identified	Not identified	Not identified	0	1	0	0	0	SD
1156	Female	PharmD	Not identified	Not identified	Identified	Not identified	Not identified	Not identified	Not identified	Not identified	Not identified	Not identified	Not identified	Not identified	Identified	Not identified	Not identified	Not identified	0	0	0	0	0	ND
4054	Male	BS													Not identified	Not identified	Not identified	Identified						OR
5354	Male	PharmD	Identified	Identified	Not identified	Not identified	Not identified	Not identified	Not identified	Not identified	Not identified	Not identified	Not identified	Not identified	Not identified	Not identified	Identified	Not identified	0	1	0	1	1	WV
5367	Male	PharmD	Identified	Identified	Not identified	Not identified	Not identified	Not identified	Identified	Not identified	Not identified	Identified	Not identified	Not identified	Not identified	Identified	Not identified	Not identified	0	1	0	1	1	WV
4052	Male	PharmD	Identified	Identified	Not identified	Not identified	Not identified	Not identified	Not identified	Not identified	Not identified	Identified	Not identified	Not identified	Identified	Not identified	Not identified	Not identified	0	1	1	0	1	OR
1040	Male	PharmD	Identified	Not identified	Not identified	Not identified	Not identified	Not identified	Not identified	Not identified	Not identified	Not identified	Not identified	Identified	Identified	Not identified	Not identified	Not identified	0	1	0	0	1	ND
5423	Female	BS	Not identified	Not identified	Not identified	Not identified	Not identified	Not identified	Not identified	Not identified	Not identified	Not identified	Not identified	Not identified	Not identified	Not identified	Not identified	Identified	0	1	0	0	1	WV
2099	Male	BS	Not identified	Not identified	Not identified	Not identified	Not identified	Not identified	Not identified	Not identified	Not identified	Not identified	Not identified	Not identified	Not identified	Not identified	Identified	Not identified	0	1	1	0	1	SD
5502	Male	PharmD	Identified	Identified	Not identified	Not identified	Not identified	Not identified	Identified	Not identified	Not identified	Not identified	Not identified	Not identified	Identified	Not identified	Not identified	Not identified	0	1	0	1	1	WV
2152	Female	PharmD	Identified	Identified	Identified	Not identified	Not identified	Not identified	Not identified	Not identified	Not identified	Identified	Not identified	Identified	Identified	Not identified	Not identified	Not identified	0	1	0	0	0	SD
4209	Female	BS	Not identified	Not identified	Not identified	Identified	Not identified	Not identified	Not identified	Not identified	Not identified	Not identified	Not identified	Not identified	Not identified	Not identified	Identified	Not identified	0	1	1	1	0	CA
5329	Female	BS	Not identified	Not identified	Not identified	Not identified	Not identified	Not identified	Identified	Not identified	Not identified	Identified	Not identified	Not identified	Identified	Not identified	Not identified	Not identified	0	1	1	1	0	WV
5301	Male	PharmD	Identified	Not identified	Identified	Not identified	Not identified	Not identified	Not identified	Identified	Not identified	Not identified	Not identified	Not identified	Identified	Not identified	Not identified	Not identified	1	1	1	0	1	WV
2122	Male	PharmD	Not identified	Not identified	Not identified	Not identified	Not identified	Not identified	Not identified	Not identified	Not identified	Not identified	Not identified	Not identified	Not identified	Not identified	Identified	Not identified	0	1	0	0	0	SD
5472	Male	PharmD	Identified	Identified	Not identified	Not identified	Not identified	Not identified	Identified	Identified	Not identified	Not identified	Not identified	Not identified	Identified	Not identified	Not identified	Not identified	0	1	0	0	0	WV
5482	Male	PharmD	Not identified	Not identified	Not identified	Not identified	Not identified	Not identified	Identified	Not identified	Not identified	Identified	Not identified	Not identified	Identified	Not identified	Not identified	Not identified	0	1	0	0	0	WV
4128	Female	PharmD	Identified	Identified	Not identified	Not identified	Not identified	Not identified	Not identified	Not identified	Not identified	Not identified	Not identified	Not identified	Not identified	Not identified	Not identified	Identified	0	1	0	0	0	OR
4187	Female	BS	Not identified	Not identified	Not identified	Not identified	Not identified	Not identified	Not identified	Not identified	Not identified	Identified	Not identified	Not identified	Identified	Not identified	Not identified	Not identified	1	1	1	0	0	CA
1012	Female	PharmD	Not identified	Not identified	Not identified	Not identified	Not identified	Not identified	Not identified	Not identified	Identified	Not identified	Not identified	Not identified	Identified	Not identified	Not identified	Not identified	0	1	1	0	0	ND
5361	Female	BS	Not identified	Not identified	Identified	Not identified	Not identified	Not identified	Identified	Not identified	Not identified	Identified	Not identified	Not identified	Not identified	Not identified	Identified	Not identified	1	1	0	0	1	WV
5077	Female	BS	Identified	Identified	Not identified	Not identified	Not identified	Not identified	Not identified	Not identified	Not identified	Not identified	Not identified	Not identified	Identified	Not identified	Not identified	Not identified	0	1	0	0	0	WV
2095	Male	PharmD	Not identified	Not identified	Not identified	Not identified	Not identified	Not identified	Not identified	Not identified	Not identified	Identified	Not identified	Identified	Identified	Not identified	Not identified	Not identified	0	0	0	1	0	SD
2065	Female	BS	Identified	Identified	Not identified	Not identified	Not identified	Not identified	Not identified	Not identified	Not identified	Not identified	Not identified	Not identified	Identified	Not identified	Not identified	Not identified	0	1	0	0	0	SD
5363	Female	PharmD	Not identified	Not identified	Not identified	Not identified	Not identified	Not identified	Identified	Not identified	Not identified	Identified	Not identified	Not identified	Not identified	Not identified	Identified	Not identified	0	1	0	1	0	WV
2100	Male	BS	Identified	Not identified	Not identified	Not identified	Not identified	Not identified	Not identified	Not identified	Not identified	Not identified	Not identified	Not identified	Identified	Not identified	Not identified	Not identified	0	1	0	1	0	SD
5352	Female	PharmD	Identified	Identified	Identified	Not identified	Not identified	Not identified	Identified	Identified	Not identified	Identified	Not identified	Not identified	Identified	Not identified	Not identified	Not identified	0	1	0	0	0	WV
2163	Female	BS	Identified	Not identified	Not identified	Not identified	Not identified	Not identified	Not identified	Not identified	Not identified	Not identified	Not identified	Not identified	Not identified	Identified	Not identified	Not identified	0	1	0	0	0	SD
5466	Female	PharmD	Not identified	Not identified	Not identified	Not identified	Not identified	Not identified	Not identified	Not identified	Not identified	Not identified	Not identified	Not identified	Identified	Not identified	Not identified	Not identified	0	1	0	0	1	WV
1025	Male	BS	Not identified	Not identified	Not identified	Not identified	Not identified	Not identified	Not identified	Not identified	Not identified	Not identified	Not identified	Not identified	Not identified	Identified	Not identified	Not identified	0	1	1	0	1	ND
4112	Female	PharmD	Identified	Identified	Identified	Not identified	Not identified	Not identified	Identified	Not identified	Not identified	Identified	Not identified	Not identified	Identified	Not identified	Not identified	Not identified	0	1	1	0	1	OR
5510	Male	BS	Not identified	Not identified	Not identified	Not identified	Not identified	Not identified	Not identified	Not identified	Not identified	Not identified	Not identified	Not identified	Not identified	Not identified	Not identified	Identified	1	1	1	0	1	WV
5117	Male	BS	Identified	Not identified	Not identified	Not identified	Not identified	Not identified	Not identified	Not identified	Not identified	Identified	Not identified	Not identified	Identified	Not identified	Not identified	Not identified	0	1	0	0	1	WV
5401	Female	BS	Identified	Identified	Identified	Not identified	Not identified	Not identified	Not identified	Not identified	Not identified	Identified	Identified	Not identified	Not identified	Not identified	Identified	Not identified	0	1	0	0	0	WV
5452	Male	PharmD	Not identified	Not identified	Not identified	Not identified	Not identified	Not identified	Not identified	Not identified	Not identified	Not identified	Not identified	Not identified	Identified	Not identified	Not identified	Not identified	1	1	1	1	1	WV
5059	Male	BS	Not identified	Not identified	Not identified	Identified	Not identified	Not identified	Not identified	Not identified	Not identified	Identified	Not identified	Identified	Not identified	Identified	Not identified	Not identified	0	1	1	1	1	WV
2149	Female	PharmD	Not identified	Not identified	Not identified	Not identified	Not identified	Not identified	Not identified	Not identified	Not identified	Identified	Not identified	Not identified	Not identified	Identified	Not identified	Not identified	0	1	0	0	0	SD
2101	Female	PharmD	Not identified	Not identified	Not identified	Not identified	Not identified	Not identified	Not identified	Not identified	Not identified	Not identified	Not identified	Not identified	Not identified	Identified	Not identified	Not identified	0	0	0	0	0	SD
5332	Female	PharmD	Not identified	Not identified	Not identified	Not identified	Not identified	Not identified	Not identified	Not identified	Not identified	Identified	Not identified	Not identified	Identified	Not identified	Not identified	Not identified	0	1	0	0	1	WV
4284	Male	PharmD	Identified	Not identified	Identified	Not identified	Not identified	Not identified	Not identified	Identified	Not identified	Not identified	Not identified	Not identified	Not identified	Identified	Not identified	Not identified						CA
5389	Female	PharmD	Identified	Identified	Identified	Not identified	Not identified	Not identified	Not identified	Not identified	Not identified	Not identified	Not identified	Not identified	Identified	Not identified	Not identified	Not identified	0	0	0	1	1	WV
5082	Male	BS	Not identified	Not identified	Not identified	Identified	Not identified	Not identified	Identified	Not identified	Not identified	Not identified	Not identified	Not identified	Not identified	Identified	Not identified	Not identified	0	1	0	0	0	WV
5376	Female	PharmD	Not identified	Not identified	Not identified	Not identified	Not identified	Not identified	Not identified	Not identified	Not identified	Not identified	Not identified	Not identified	Not identified	Identified	Not identified	Not identified	0	1	0	0	0	WV
4003	Female	PharmD	Not identified	Not identified	Not identified	Not identified	Not identified	Not identified	Not identified	Not identified	Not identified	Not identified	Not identified	Not identified	Identified	Not identified	Not identified	Not identified	0	1	0	0	0	CA
1078	Male	PharmD	Not identified	Not identified	Not identified	Not identified	Not identified	Not identified	Not identified	Not identified	Not identified	Not identified	Not identified	Not identified	Identified	Not identified	Not identified	Not identified	0	1	0	0	0	ND
2112	Female	PharmD	Identified	Identified	Not identified	Identified	Not identified	Not identified	Identified	Identified	Not identified	Identified	Not identified	Not identified	Not identified	Identified	Not identified	Not identified	0	0	0	0	0	SD
5237	Female	BS	Not identified	Not identified	Not identified	Identified	Not identified	Not identified	Not identified	Not identified	Not identified	Not identified	Not identified	Not identified	Identified	Not identified	Not identified	Not identified	0	1	0	1	0	WV
4129	Female	PharmD	Not identified	Not identified	Not identified	Not identified	Not identified	Not identified	Not identified	Not identified	Not identified	Not identified	Not identified	Not identified	Not identified	Identified	Not identified	Not identified	0	1	1	0	0	OR
5289	Female	PharmD	Not identified	Not identified	Not identified	Not identified	Not identified	Not identified	Not identified	Not identified	Not identified	Not identified	Not identified	Not identified	Identified	Not identified	Not identified	Not identified	1	1	1	1	0	WV
5518	Female	PharmD	Not identified	Not identified	Not identified	Not identified	Not identified	Not identified	Not identified	Not identified	Not identified	Not identified	Not identified	Not identified	Not identified	Identified	Not identified	Not identified	0	0	0	0	0	WV
5072	Female	BS	Identified	Not identified	Not identified	Not identified	Not identified	Not identified	Identified	Not identified	Not identified	Identified	Not identified	Not identified	Not identified	Not identified	Not identified	Identified	0	1	0	0	0	WV
5333	Male	PharmD	Not identified	Not identified	Identified	Not identified	Not identified	Not identified	Not identified	Not identified	Not identified	Not identified	Not identified	Not identified	Identified	Not identified	Not identified	Not identified	1	1	0	0	1	WV
5492	Male	BS	Not identified	Not identified	Not identified	Not identified	Not identified	Not identified	Not identified	Not identified	Not identified	Not identified	Not identified	Not identified	Identified	Not identified	Not identified	Not identified	1	1	0	1	1	WV
2025	Male	BS	Not identified	Not identified	Not identified	Not identified	Not identified	Not identified	Not identified	Not identified	Not identified	Not identified	Not identified	Not identified	Not identified	Not identified	Identified	Not identified	1	0	0	0	0	SD
5181	Male	BS	Not identified	Not identified	Not identified	Not identified	Not identified	Not identified	Identified	Not identified	Not identified	Not identified	Not identified	Not identified	Not identified	Identified	Not identified	Not identified	0	1	1	1	1	WV
4197	Male	PharmD	Identified	Not identified	Not identified	Not identified	Not identified	Not identified	Not identified	Not identified	Not identified	Not identified	Not identified	Not identified	Not identified	Identified	Not identified	Not identified	0	1	1	0	1	CA
5341	Female	PharmD	Identified	Not identified	Identified	Not identified	Not identified	Not identified	Identified	Not identified	Identified	Not identified	Not identified	Not identified	Not identified	Not identified	Identified	Not identified	0	1	0	1	1	WV
5273	Male	PharmD	Not identified	Not identified	Not identified	Not identified	Not identified	Not identified	Not identified	Not identified	Not identified	Identified	Not identified	Not identified	Not identified	Not identified	Not identified	Identified	0	1	0	0	1	WV
5017	Female	PharmD	Identified	Not identified	Not identified	Not identified	Not identified	Not identified	Identified	Not identified	Not identified	Not identified	Not identified	Not identified	Identified	Not identified	Not identified	Not identified	0	1	1	1	1	WV
5249	Female	PharmD	Not identified	Not identified	Not identified	Not identified	Not identified	Not identified	Not identified	Not identified	Not identified	Identified	Not identified	Not identified	Identified	Not identified	Not identified	Not identified	0	1	1	1	1	WV
5321	Female	PharmD	Not identified	Not identified	Not identified	Not identified	Not identified	Not identified	Not identified	Not identified	Not identified	Not identified	Not identified	Not identified	Identified	Not identified	Not identified	Not identified	0	1	1	0	1	WV
5235	Female	PharmD	Not identified	Not identified	Not identified	Not identified	Not identified	Not identified	Identified	Not identified	Not identified	Identified	Not identified	Not identified	Identified	Not identified	Not identified	Not identified	0	1	0	0	1	WV
2013	Female	BS	Not identified	Not identified	Not identified	Not identified	Not identified	Not identified	Identified	Not identified	Not identified	Identified	Not identified	Not identified	Not identified	Not identified	Identified	Not identified	0	1	0	0	0	SD
5392	Male	PharmD	Identified	Not identified	Not identified	Not identified	Not identified	Not identified	Not identified	Not identified	Not identified	Not identified	Not identified	Not identified	Identified	Not identified	Not identified	Not identified	1	1	1	1	1	WV
2061	Female	BS	Not identified	Not identified	Not identified	Not identified	Not identified	Not identified	Not identified	Not identified	Not identified	Not identified	Not identified	Not identified	Not identified	Identified	Not identified	Not identified	0	1	0	0	0	SD
5169	Female	PharmD	Identified	Identified	Identified	Not identified	Not identified	Not identified	Not identified	Not identified	Not identified	Not identified	Not identified	Not identified	Not identified	Identified	Not identified	Not identified	0	1	1	0	0	WV
1123	Male	BS	Not identified	Identified	Not identified	Not identified	Not identified	Not identified	Not identified	Not identified	Not identified	Not identified	Not identified	Not identified	Not identified	Not identified	Identified	Not identified	0	1	0	0	1	ND
2098	Male	BS	Not identified	Not identified	Not identified	Not identified	Not identified	Not identified	Identified	Not identified	Not identified	Not identified	Not identified	Not identified	Not identified	Identified	Not identified	Not identified	0	1	0	0	0	SD
4248	Male	PharmD	Not identified	Not identified	Not identified	Not identified	Not identified	Not identified	Not identified	Not identified	Not identified	Not identified	Not identified	Not identified	Identified	Not identified	Not identified	Not identified	0	1	0	0	0	OR
5362	Female	BS	Identified	Not identified	Not identified	Identified	Not identified	Not identified	Not identified	Not identified	Not identified	Not identified	Identified	Not identified	Not identified	Not identified	Not identified	Identified	0	1	1	0	1	WV
5207	Male	BS	Not identified	Not identified	Not identified	Not identified	Not identified	Not identified	Not identified	Not identified	Not identified	Not identified	Not identified	Not identified	Not identified	Not identified	Identified	Not identified	0	1	0	0	0	WV
4088	Male	PharmD	Not identified	Not identified	Not identified	Not identified	Not identified	Not identified	Not identified	Not identified	Not identified	Not identified	Not identified	Not identified	Identified	Not identified	Not identified	Not identified	1	1	0	0	1	CA
1036	Male	BS	Not identified	Not identified	Not identified	Not identified	Not identified	Not identified	Not identified	Not identified	Not identified	Not identified	Not identified	Not identified	Identified	Not identified	Not identified	Not identified	0	1	0	0	0	ND
5108	Female	PharmD	Not identified	Not identified	Not identified	Not identified	Not identified	Not identified	Identified	Not identified	Not identified	Identified	Not identified	Not identified	Identified	Not identified	Not identified	Not identified	0	1	1	1	1	WV
5061	Female	BS	Not identified	Not identified	Not identified	Not identified	Not identified	Not identified	Not identified	Not identified	Not identified	Identified	Not identified	Not identified	Not identified	Identified	Not identified	Not identified	0	1	0	0	0	WV
2113	Female	BS	Not identified	Not identified	Not identified	Not identified	Not identified	Not identified	Not identified	Not identified	Not identified	Identified	Not identified	Not identified	Identified	Not identified	Not identified	Not identified	0	1	0	0	1	SD
2001	Female	PharmD	Identified	Not identified	Not identified	Not identified	Not identified	Not identified	Not identified	Not identified	Not identified	Identified	Not identified	Not identified	Not identified	Identified	Not identified	Not identified	0	1	0	0	0	SD
5463	Male	PharmD	Not identified	Not identified	Not identified	Not identified	Not identified	Not identified	Not identified	Not identified	Not identified	Identified	Not identified	Not identified	Not identified	Identified	Not identified	Not identified	0	1	0	1	1	WV
5500	Female	PharmD	Identified	Identified	Identified	Not identified	Not identified	Not identified	Not identified	Not identified	Not identified	Identified	Not identified	Not identified	Not identified	Not identified	Not identified	Identified	0	1	0	0	0	WV
2157	Female	BS	Not identified	Not identified	Not identified	Not identified	Not identified	Not identified	Not identified	Not identified	Not identified	Identified	Not identified	Not identified	Not identified	Identified	Not identified	Not identified	0	1	0	1	0	SD
5014	Male	BS	Not identified	Not identified	Not identified	Not identified	Not identified	Not identified	Identified	Not identified	Not identified	Identified	Not identified	Not identified	Identified	Not identified	Not identified	Not identified	0	1	0	0	1	WV
5480	Male	BS	Identified	Not identified	Identified	Identified	Not identified	Not identified	Not identified	Not identified	Not identified	Identified	Not identified	Not identified	Not identified	Identified	Not identified	Not identified						WV
5444	Female	PharmD	Not identified	Not identified	Not identified	Not identified	Not identified	Not identified	Not identified	Not identified	Not identified	Identified	Not identified	Not identified	Not identified	Identified	Not identified	Not identified	0	1	0	1	1	WV
4121	Male	BS													Not identified	Not identified	Not identified	Identified						CA
1047	Female	PharmD	Not identified	Not identified	Not identified	Identified	Not identified	Not identified	Not identified	Not identified	Not identified	Not identified	Not identified	Not identified	Not identified	Identified	Not identified	Not identified	0	1	0	0	1	ND
5253	Male	PharmD	Not identified	Not identified	Not identified	Not identified	Not identified	Not identified	Not identified	Not identified	Not identified	Not identified	Not identified	Not identified	Not identified	Not identified	Identified	Not identified	0	0	1	1	1	WV
5147	Male	PharmD	Not identified	Not identified	Not identified	Not identified	Not identified	Not identified	Not identified	Not identified	Not identified	Identified	Not identified	Not identified	Not identified	Not identified	Identified	Not identified	0	1	1	1	0	WV
1009	Male	PharmD	Not identified	Not identified	Not identified	Not identified	Not identified	Not identified	Not identified	Not identified	Not identified	Identified	Not identified	Not identified	Identified	Not identified	Not identified	Not identified	0	0	1	1	1	ND
5189	Male	PharmD	Identified	Not identified	Not identified	Not identified	Not identified	Not identified	Not identified	Not identified	Not identified	Not identified	Not identified	Not identified	Identified	Not identified	Not identified	Not identified	0	1	0	0	0	WV
4198	Male	PharmD	Not identified	Not identified	Not identified	Not identified	Not identified	Not identified	Identified	Not identified	Not identified	Identified	Not identified	Not identified	Identified	Not identified	Not identified	Not identified	0	1	0	1	1	OR
1042	Female	BS	Identified	Not identified	Not identified	Not identified	Not identified	Not identified	Identified	Not identified	Not identified	Not identified	Not identified	Not identified	Not identified	Not identified	Not identified	Identified	0	1	0	1	0	ND
5337	Female	BS	Not identified	Not identified	Not identified	Not identified	Not identified	Not identified	Identified	Not identified	Not identified	Not identified	Not identified	Not identified	Not identified	Not identified	Not identified	Identified	0	1	1	1	1	WV
5025	Male	BS	Not identified	Not identified	Not identified	Not identified	Not identified	Not identified	Not identified	Not identified	Not identified	Not identified	Not identified	Not identified	Identified	Not identified	Not identified	Not identified	0	1	0	0	0	WV
2007	Male	BS	Identified	Not identified	Not identified	Not identified	Not identified	Not identified	Not identified	Not identified	Not identified	Identified	Not identified	Not identified	Not identified	Identified	Not identified	Not identified	0	1	0	0	0	SD
2047	Female	BS	Not identified	Not identified	Not identified	Not identified	Not identified	Not identified	Identified	Not identified	Not identified	Identified	Not identified	Not identified	Identified	Not identified	Not identified	Not identified	0	1	0	0	0	SD
5411	Female	PharmD	Identified	Not identified	Not identified	Not identified	Not identified	Not identified	Not identified	Not identified	Not identified	Identified	Not identified	Identified	Identified	Not identified	Not identified	Not identified	1	1	1	1	0	WV
5475	Female	PharmD	Identified	Identified	Not identified	Not identified	Not identified	Not identified	Identified	Not identified	Not identified	Not identified	Not identified	Not identified	Identified	Not identified	Not identified	Not identified	0	1	1	1	1	WV
1115	Female	PharmD	Identified	Not identified	Not identified	Not identified	Not identified	Not identified	Not identified	Not identified	Not identified	Not identified	Not identified	Not identified	Identified	Not identified	Not identified	Not identified	0	1	0	1	1	ND
5434	Male	BS	Not identified	Not identified	Not identified	Not identified	Not identified	Not identified	Not identified	Not identified	Not identified	Not identified	Not identified	Not identified	Not identified	Not identified	Not identified	Identified						WV
4109	Male	PharmD	Not identified	Not identified	Not identified	Identified	Not identified	Not identified	Not identified	Not identified	Not identified	Not identified	Not identified	Not identified	Not identified	Identified	Not identified	Not identified	0	1	0	0	1	CA
4123	Male	BS	Not identified	Not identified	Not identified	Not identified	Not identified	Not identified	Identified	Not identified	Not identified	Not identified	Not identified	Not identified	Not identified	Identified	Not identified	Not identified	0	0	0	0	0	CA
4257	Female	BS	Identified	Not identified	Not identified	Not identified	Not identified	Not identified	Not identified	Not identified	Not identified	Not identified	Not identified	Not identified	Not identified	Not identified	Not identified	Identified	0	0	0	0	0	CA
1083	Male	PharmD	Identified	Not identified	Not identified	Not identified	Not identified	Not identified	Not identified	Not identified	Not identified	Not identified	Not identified	Not identified	Not identified	Not identified	Not identified	Identified	0	1	0	0	0	ND
5111	Male	PharmD	Identified	Not identified	Identified	Not identified	Not identified	Not identified	Not identified	Not identified	Not identified	Not identified	Identified	Not identified	Identified	Not identified	Not identified	Not identified	1	1	0			WV
4166	Male	PharmD	Identified	Identified	Identified	Not identified	Not identified	Not identified	Not identified	Not identified	Not identified	Not identified	Not identified	Not identified	Identified	Not identified	Not identified	Not identified	0	0	0	0	0	CA
5420	Female	PharmD	Not identified	Not identified	Not identified	Identified	Not identified	Not identified	Not identified	Identified	Not identified	Identified	Not identified	Not identified	Not identified	Not identified	Identified	Not identified	0	1	0	1	1	WV
5407	Male	PharmD	Identified	Identified	Identified	Not identified	Not identified	Not identified	Identified	Identified	Not identified	Identified	Not identified	Not identified	Not identified	Identified	Not identified	Not identified	1	1	0	0	1	WV
4203	Female	PharmD	Not identified	Not identified	Not identified	Not identified	Not identified	Not identified	Not identified	Not identified	Not identified	Identified	Not identified	Not identified	Identified	Not identified	Not identified	Not identified	0	0	0	0	0	OR
2129	Female	BS	Not identified	Not identified	Not identified	Not identified	Not identified	Not identified	Not identified	Not identified	Not identified	Not identified	Not identified	Not identified	Identified	Not identified	Not identified	Not identified	0	1	0	0	1	SD
2062	Female	BS	Identified	Not identified	Not identified	Not identified	Not identified	Not identified	Not identified	Not identified	Not identified	Identified	Not identified	Not identified	Not identified	Identified	Not identified	Not identified	0	1	0	0	0	SD
5010	Male	PharmD	Not identified	Not identified	Not identified	Not identified	Not identified	Not identified	Identified	Not identified	Not identified	Identified	Not identified	Not identified	Not identified	Not identified	Not identified	Identified	0	1	1	1	1	WV
5368	Male	BS	Identified	Identified	Identified	Not identified	Identified	Identified	Not identified	Not identified	Not identified	Not identified	Not identified	Not identified	Not identified	Not identified	Not identified	Identified	0	1	1	0	1	WV
5371	Female	PharmD	Identified	Identified	Identified	Identified	Not identified	Not identified	Not identified	Not identified	Not identified	Not identified	Not identified	Not identified	Identified	Not identified	Not identified	Not identified	0	1	1	0	0	WV
5037	Male	PharmD	Not identified	Not identified	Not identified	Not identified	Not identified	Not identified	Not identified	Not identified	Not identified	Not identified	Not identified	Not identified	Not identified	Identified	Not identified	Not identified	0	1	1	0	1	WV
2126	Female	BS	Not identified	Not identified	Not identified	Identified	Not identified	Not identified	Not identified	Not identified	Not identified	Not identified	Not identified	Not identified	Identified	Not identified	Not identified	Not identified	0	0	0	0	0	SD
5096	Female	PharmD	Not identified	Not identified	Not identified	Not identified	Not identified	Not identified	Not identified	Not identified	Not identified	Not identified	Not identified	Not identified	Not identified	Identified	Not identified	Not identified	0	1	1	1	1	WV
1151	Female	PharmD	Identified	Not identified	Identified	Not identified	Not identified	Not identified	Not identified	Not identified	Not identified	Not identified	Not identified	Not identified	Not identified	Not identified	Not identified	Identified	0	1	0	0	0	ND
2056	Male	BS	Not identified	Not identified	Not identified	Not identified	Not identified	Not identified	Not identified	Not identified	Not identified	Not identified	Not identified	Not identified	Not identified	Not identified	Not identified	Identified	0	1	1	0	0	SD
4082	Male	BS	Not identified	Not identified	Not identified	Not identified	Not identified	Not identified	Identified	Not identified	Not identified	Not identified	Not identified	Not identified	Identified	Not identified	Not identified	Not identified	0	1	0	0	0	CA
4096	Male	PharmD	Not identified	Not identified	Not identified	Not identified	Not identified	Not identified	Not identified	Not identified	Not identified	Not identified	Not identified	Not identified	Not identified	Identified	Not identified	Not identified	0	1	0	0	0	CA
1024	Female	PharmD	Not identified	Not identified	Not identified	Not identified	Not identified	Not identified	Not identified	Not identified	Not identified	Not identified	Not identified	Not identified	Not identified	Not identified	Not identified	Not identified	0	1	0	0	0	ND
5080	Male	BS	Not identified	Not identified	Identified	Not identified	Not identified	Not identified	Not identified	Not identified	Not identified	Identified	Not identified	Not identified	Not identified	Not identified	Identified	Not identified	1	1	1	1	1	WV
5369	Female	PharmD	Identified	Not identified	Not identified	Not identified	Not identified	Not identified	Not identified	Not identified	Not identified	Not identified	Not identified	Not identified	Not identified	Not identified	Identified	Not identified	0	1	0	0	1	WV
5018	Male	BS	Identified	Identified	Not identified	Not identified	Not identified	Not identified	Not identified	Not identified	Not identified	Identified	Not identified	Identified	Identified	Not identified	Not identified	Not identified	1	1	0	1	0	WV
2173	Female	PharmD	Not identified	Not identified	Not identified	Not identified	Not identified	Not identified	Identified	Not identified	Not identified	Identified	Not identified	Not identified	Identified	Not identified	Not identified	Not identified	0	1	0	0	0	SD
5512	Male	BS	Not identified	Not identified	Not identified	Not identified	Not identified	Not identified	Identified	Not identified	Not identified	Identified	Not identified	Not identified	Not identified	Identified	Not identified	Not identified	0	1	0	0	0	WV
4270	Male	PharmD	Not identified	Not identified	Not identified	Not identified	Not identified	Not identified	Not identified	Not identified	Not identified	Identified	Not identified	Not identified	Not identified	Not identified	Not identified	Identified	0	1	0	0	0	CA
1132	Female	PharmD	Not identified	Not identified	Not identified	Not identified	Not identified	Not identified	Not identified	Not identified	Not identified	Not identified	Not identified	Not identified	Identified	Not identified	Not identified	Not identified	0	1	0	1	1	ND
5300	Male	BS	Not identified	Not identified	Not identified	Not identified	Not identified	Not identified	Not identified	Not identified	Not identified	Not identified	Not identified	Not identified	Not identified	Not identified	Not identified	Identified	0	1	0	0	1	WV
5336	Male	PharmD	Not identified	Not identified	Not identified	Not identified	Not identified	Not identified	Not identified	Not identified	Not identified	Not identified	Not identified	Not identified	Not identified	Not identified	Not identified	Identified	1	1	1	0	0	WV
2002	Male	BS	Not identified	Not identified	Not identified	Not identified	Not identified	Not identified	Not identified	Not identified	Not identified	Identified	Not identified	Not identified	Not identified	Not identified	Identified	Not identified	0	1	0	0	1	SD
2136	Female	BS	Not identified	Not identified	Not identified	Not identified	Not identified	Not identified	Not identified	Identified	Not identified	Not identified	Not identified	Not identified	Identified	Not identified	Not identified	Not identified	0	1	1	0	0	SD
5364	Female	PharmD	Identified	Not identified	Not identified	Not identified	Not identified	Not identified	Not identified	Not identified	Not identified	Identified	Not identified	Not identified	Identified	Not identified	Not identified	Not identified	0	1	1	0	0	WV
5384	Female	PharmD	Not identified	Not identified	Not identified	Not identified	Not identified	Not identified	Identified	Not identified	Not identified	Not identified	Not identified	Identified	Not identified	Not identified	Not identified	Identified	0	1	0	0	0	WV
5223	Female	BS	Not identified	Not identified	Not identified	Not identified	Not identified	Not identified	Not identified	Not identified	Not identified	Not identified	Not identified	Not identified	Identified	Not identified	Not identified	Not identified	0	1	1	0	1	WV
5433	Male	BS	Identified	Not identified	Identified	Not identified	Not identified	Not identified	Identified	Not identified	Not identified	Identified	Not identified	Not identified	Not identified	Not identified	Identified	Not identified	0	1	1	0	1	WV
4025	Female	BS	Not identified	Not identified	Not identified	Not identified	Not identified	Not identified	Not identified	Not identified	Not identified	Identified	Not identified	Not identified	Not identified	Identified	Not identified	Not identified	0	1	0	0	0	CA
5118	Male	BS	Not identified	Not identified	Not identified	Not identified	Not identified	Not identified	Identified	Not identified	Not identified	Identified	Not identified	Not identified	Not identified	Identified	Not identified	Not identified	0	1	0	0	1	WV
4236	Male	PharmD	Not identified	Not identified	Not identified	Not identified	Not identified	Not identified	Not identified	Not identified	Not identified	Not identified	Not identified	Not identified	Not identified	Identified	Not identified	Not identified	0	1	0	0	1	OR
1139	Male	BS	Identified	Not identified	Not identified	Not identified	Not identified	Not identified	Not identified	Not identified	Not identified	Not identified	Not identified	Not identified	Identified	Not identified	Not identified	Not identified	0	1	0	0	1	ND
1086	Female	BS	Identified	Identified	Not identified	Not identified	Not identified	Not identified	Not identified	Not identified	Not identified	Not identified	Not identified	Not identified	Identified	Not identified	Not identified	Not identified	0	1	0	1	0	ND
2010	Female	BS	Not identified	Not identified	Not identified	Not identified	Not identified	Not identified	Not identified	Not identified	Not identified	Identified	Not identified	Not identified	Not identified	Identified	Not identified	Not identified	1	1	1	1	1	SD
1079	Female	PharmD	Identified	Not identified	Not identified	Not identified	Not identified	Not identified	Not identified	Not identified	Not identified	Not identified	Not identified	Not identified	Not identified	Not identified	Not identified	Identified	0	1	0	0	0	ND
4145	Male	PharmD	Not identified	Not identified	Not identified	Not identified	Not identified	Not identified	Not identified	Not identified	Not identified	Identified	Not identified	Not identified	Identified	Not identified	Not identified	Not identified	0	1	0	1	1	OR
4213	Male	PharmD	Identified	Not identified	Identified	Not identified	Not identified	Not identified	Not identified	Not identified	Not identified	Not identified	Not identified	Not identified	Not identified	Not identified	Identified	Not identified	0	1	0	0	0	CA
5054	Female	BS	Identified	Identified	Not identified	Not identified	Not identified	Not identified	Identified	Not identified	Not identified	Not identified	Not identified	Not identified	Not identified	Not identified	Not identified	Identified	0	1	0	0	1	WV
2147	Female	PharmD	Identified	Not identified	Not identified	Not identified	Not identified	Not identified	Not identified	Not identified	Not identified	Not identified	Not identified	Not identified	Identified	Not identified	Not identified	Not identified	0	1	0	0	0	SD
2107	Male	BS	Not identified	Not identified	Not identified	Not identified	Not identified	Not identified	Not identified	Not identified	Not identified	Not identified	Not identified	Not identified	Not identified	Not identified	Not identified	Identified	0	0	0	0	0	SD
5403	Male	PharmD	Not identified	Not identified	Not identified	Not identified	Not identified	Not identified	Not identified	Not identified	Not identified	Not identified	Not identified	Not identified	Identified	Not identified	Not identified	Not identified	0	1	0	0	0	WV
5244	Male	BS	Identified	Identified	Not identified	Not identified	Not identified	Not identified	Identified	Not identified	Not identified	Identified	Not identified	Not identified	Not identified	Identified	Not identified	Not identified	0	1	0	1	1	WV
4110	Male	PharmD	Not identified	Not identified	Not identified	Not identified	Not identified	Not identified	Not identified	Not identified	Not identified	Not identified	Not identified	Not identified	Not identified	Not identified	Not identified	Identified	0	1	0	1	0	CA
4275	Male	PharmD	Not identified	Not identified	Not identified	Not identified	Not identified	Not identified	Not identified	Not identified	Not identified	Not identified	Not identified	Not identified	Identified	Not identified	Not identified	Not identified	0	1	0	0	1	CA
4171	Male	PharmD	Not identified	Not identified	Not identified	Not identified	Not identified	Not identified	Not identified	Not identified	Not identified	Identified	Not identified	Not identified	Identified	Not identified	Not identified	Not identified	0	1	0	0	1	CA
5020	Male	PharmD	Identified	Not identified	Not identified	Not identified	Not identified	Not identified	Not identified	Not identified	Not identified	Not identified	Not identified	Not identified	Identified	Not identified	Not identified	Not identified	0	1	1	0	0	WV
5377	Male	PharmD	Not identified	Not identified	Not identified	Not identified	Not identified	Not identified	Not identified	Not identified	Not identified	Not identified	Not identified	Not identified	Not identified	Not identified	Identified	Not identified	1	1	0	1	0	WV
2018	Male	BS	Not identified	Not identified	Not identified	Not identified	Not identified	Not identified	Not identified	Not identified	Not identified	Identified	Not identified	Not identified	Not identified	Not identified	Identified	Not identified						SD
1019	Male	PharmD	Not identified	Not identified	Not identified	Not identified	Not identified	Not identified	Identified	Not identified	Not identified	Not identified	Not identified	Not identified	Identified	Not identified	Not identified	Not identified	0	1	0	1	1	ND
4095	Male	PharmD	Identified	Not identified	Not identified	Not identified	Not identified	Not identified	Not identified	Not identified	Not identified	Identified	Not identified	Not identified	Not identified	Identified	Not identified	Not identified	0	1	0	1	1	CA
5305	Male	PharmD	Identified	Not identified	Not identified	Identified	Not identified	Not identified	Not identified	Not identified	Not identified	Identified	Not identified	Not identified	Identified	Not identified	Not identified	Not identified	0	1	1	1	1	WV
4101	Female	BS	Identified	Identified	Not identified	Not identified	Not identified	Not identified	Not identified	Not identified	Not identified	Not identified	Not identified	Not identified	Not identified	Not identified	Not identified	Identified	1	1	0	0	0	OR
1030	Female	PharmD	Identified	Not identified	Not identified	Not identified	Not identified	Not identified	Not identified	Not identified	Not identified	Not identified	Not identified	Not identified	Not identified	Identified	Not identified	Not identified	0	0	0	1	0	ND
5471	Male	PharmD	Not identified	Not identified	Not identified	Not identified	Not identified	Not identified	Not identified	Not identified	Not identified	Not identified	Not identified	Not identified	Identified	Not identified	Not identified	Not identified	0	1	0	1	1	WV
2135	Female	PharmD	Not identified	Not identified	Not identified	Not identified	Not identified	Not identified	Identified	Not identified	Not identified	Identified	Not identified	Not identified	Identified	Not identified	Not identified	Not identified	0	1	1	1	0	SD
4027	Male	PharmD	Not identified	Not identified	Not identified	Not identified	Not identified	Not identified	Not identified	Not identified	Not identified	Not identified	Not identified	Not identified	Not identified	Identified	Not identified	Not identified	0	1	1	0	0	CA
5067	Female	BS	Identified	Not identified	Not identified	Not identified	Not identified	Not identified	Identified	Not identified	Not identified	Identified	Not identified	Not identified	Identified	Not identified	Not identified	Not identified	0	1	1	0	0	WV
5152	Male	BS	Not identified	Not identified	Not identified	Not identified	Identified	Not identified	Not identified	Not identified	Not identified	Not identified	Not identified	Not identified	Not identified	Not identified	Identified	Not identified	1	1	0	0	1	WV
5268	Male	PharmD	Not identified	Not identified	Identified	Not identified	Not identified	Not identified	Not identified	Not identified	Not identified	Identified	Not identified	Not identified	Identified	Not identified	Not identified	Not identified	0	1	0	0	0	WV
2082	Female	PharmD	Not identified	Not identified	Not identified	Not identified	Not identified	Not identified	Identified	Not identified	Not identified	Identified	Not identified	Not identified	Identified	Not identified	Not identified	Not identified	0	1	1	1	1	SD
2050	Female	PharmD	Not identified	Not identified	Not identified	Not identified	Not identified	Not identified	Not identified	Not identified	Not identified	Not identified	Not identified	Not identified	Not identified	Not identified	Not identified	Identified	0	1	0	0	0	SD
2052	Female	PharmD	Identified	Not identified	Not identified	Not identified	Not identified	Not identified	Identified	Not identified	Not identified	Identified	Not identified	Not identified	Not identified	Not identified	Not identified	Identified	0	1	0	0	0	SD
5456	Female	PharmD	Identified	Not identified	Identified	Not identified	Not identified	Not identified	Not identified	Not identified	Not identified	Not identified	Not identified	Not identified	Identified	Not identified	Not identified	Not identified	0	1	1	1	1	WV
5081	Male	BS	Not identified	Not identified	Not identified	Not identified	Not identified	Not identified	Not identified	Not identified	Not identified	Not identified	Not identified	Not identified	Identified	Not identified	Not identified	Not identified	0	1	0	0	0	WV
1058	Female	PharmD	Not identified	Not identified	Not identified	Not identified	Not identified	Not identified	Identified	Not identified	Not identified	Identified	Not identified	Not identified	Not identified	Not identified	Identified	Not identified	1	1	1	1	0	ND
5042	Male	BS	Not identified	Not identified	Identified	Not identified	Not identified	Not identified	Not identified	Not identified	Not identified	Not identified	Not identified	Not identified	Identified	Not identified	Not identified	Not identified	0	1	0	0	0	WV
5479	Male	PharmD	Identified	Identified	Not identified	Not identified	Not identified	Not identified	Not identified	Not identified	Not identified	Not identified	Not identified	Identified	Not identified	Not identified	Not identified	Not identified	0	1	0	0	0	WV
5112	Female	BS	Not identified	Not identified	Not identified	Not identified	Not identified	Not identified	Not identified	Not identified	Not identified	Not identified	Not identified	Not identified	Not identified	Identified	Not identified	Not identified	1	1	1	1	1	WV
5314	Female	BS	Not identified	Not identified	Identified	Not identified	Not identified	Not identified	Not identified	Identified	Not identified	Not identified	Identified	Not identified	Identified	Not identified	Not identified	Not identified	0	1	1	0	1	WV
5286	Female	PharmD	Not identified	Not identified	Not identified	Not identified	Not identified	Not identified	Not identified	Not identified	Not identified	Not identified	Not identified	Identified	Not identified	Identified	Not identified	Not identified	0	1	1	1	1	WV
2037	Female	PharmD	Not identified	Not identified	Not identified	Not identified	Not identified	Not identified	Identified	Not identified	Not identified	Identified	Not identified	Not identified	Identified	Not identified	Not identified	Not identified	0	1	0	0	0	SD
5435	Female	PharmD	Identified	Not identified	Not identified	Not identified	Not identified	Not identified	Not identified	Not identified	Not identified	Not identified	Not identified	Not identified	Identified	Not identified	Not identified	Not identified	0	1	0	0	0	WV
2133	Female	PharmD	Identified	Identified	Not identified	Not identified	Not identified	Not identified	Not identified	Not identified	Not identified	Not identified	Not identified	Not identified	Not identified	Identified	Not identified	Not identified	0	0	0	0	1	SD
1068	Female	PharmD	Identified	Not identified	Not identified	Not identified	Not identified	Not identified	Identified	Not identified	Not identified	Not identified	Identified	Not identified	Identified	Not identified	Not identified	Not identified	0	1	1	1	0	ND
4047	Female	BS	Not identified	Not identified	Not identified	Not identified	Not identified	Not identified	Not identified	Not identified	Not identified	Not identified	Not identified	Not identified	Not identified	Not identified	Not identified	Identified	0	1	0	0	0	OR
4183	Male	PharmD	Not identified	Not identified	Not identified	Not identified	Not identified	Not identified	Identified	Not identified	Not identified	Identified	Not identified	Not identified	Identified	Not identified	Not identified	Not identified	0	1	0	1	0	OR
5007	Female	PharmD	Not identified	Not identified	Not identified	Not identified	Not identified	Not identified	Not identified	Not identified	Not identified	Identified	Not identified	Not identified	Not identified	Identified	Not identified	Not identified	0	1	1	1	0	WV
5431	Male	BS	Not identified	Not identified	Not identified	Not identified	Not identified	Not identified	Not identified	Not identified	Not identified	Identified	Not identified	Not identified	Identified	Not identified	Not identified	Not identified	0	1	0	0	0	WV
5194	Female	BS	Identified	Not identified	Identified	Not identified	Not identified	Not identified	Not identified	Identified	Not identified	Identified	Not identified	Not identified	Identified	Not identified	Not identified	Not identified	0	1	1	0	1	WV
2017	Male	PharmD	Not identified	Not identified	Not identified	Not identified	Not identified	Not identified	Not identified	Not identified	Not identified	Not identified	Not identified	Not identified	Identified	Not identified	Not identified	Not identified	0	1	0	0	0	SD
4178	Female	PharmD	Identified	Identified	Not identified	Not identified	Not identified	Not identified	Identified	Not identified	Not identified	Not identified	Not identified	Not identified	Not identified	Identified	Not identified	Not identified	0	1	0	0	0	CA
4038	Female	BS	Not identified	Not identified	Not identified	Not identified	Not identified	Not identified	Not identified	Not identified	Not identified	Not identified	Not identified	Not identified	Not identified	Not identified	Not identified	Identified						CA
5166	Female	BS	Identified	Not identified	Not identified	Not identified	Not identified	Not identified	Identified	Not identified	Not identified	Not identified	Not identified	Not identified	Not identified	Identified	Not identified	Not identified	0	1	0	0	0	WV
1001	Female	BS	Not identified	Not identified	Not identified	Not identified	Not identified	Not identified	Not identified	Not identified	Not identified	Identified	Not identified	Not identified	Not identified	Not identified	Not identified	Identified	0	1	0	0	0	ND
1159	Female	PharmD	Identified	Not identified	Not identified	Not identified	Not identified	Not identified	Not identified	Not identified	Not identified	Not identified	Not identified	Not identified	Not identified	Identified	Not identified	Not identified	0	1	0	0	0	ND
5313	Male	BS	Identified	Not identified	Identified	Not identified	Not identified	Not identified	Not identified	Not identified	Not identified	Not identified	Not identified	Not identified	Not identified	Not identified	Not identified	Identified	1	1	1	1	0	WV
4221	Male	PharmD	Identified	Identified	Identified	Not identified	Not identified	Not identified	Not identified	Not identified	Not identified	Not identified	Not identified	Not identified	Not identified	Identified	Not identified	Not identified	0	1	0	0	1	CA
5179	Male	PharmD	Not identified	Not identified	Not identified	Not identified	Not identified	Not identified	Identified	Not identified	Not identified	Not identified	Not identified	Not identified	Identified	Not identified	Not identified	Not identified	0	1	0	0	1	WV
4180	Male	BS	Not identified	Not identified	Not identified	Not identified	Not identified	Not identified	Not identified	Not identified	Not identified	Not identified	Not identified	Not identified	Identified	Not identified	Not identified	Not identified	0	1	1	0	0	CA
5393	Female	PharmD	Not identified	Not identified	Not identified	Not identified	Not identified	Not identified	Identified	Not identified	Not identified	Identified	Not identified	Not identified	Not identified	Not identified	Not identified	Identified	1	1	1	0	1	WV
4149	Male	BS	Not identified	Not identified	Not identified	Not identified	Not identified	Not identified	Not identified	Not identified	Not identified	Not identified	Not identified	Not identified	Not identified	Identified	Not identified	Not identified	0	0	0	0	0	CA
2051	Male	PharmD	Not identified	Not identified	Not identified	Not identified	Not identified	Not identified	Identified	Not identified	Not identified	Not identified	Not identified	Not identified	Not identified	Not identified	Identified	Not identified	0	1	0	0	1	SD
2055	Female	PharmD	Identified	Not identified	Not identified	Not identified	Not identified	Not identified	Not identified	Not identified	Not identified	Identified	Not identified	Not identified	Identified	Not identified	Not identified	Not identified	0	1	0	0	1	SD
4139	Male	BS	Not identified	Not identified	Not identified	Not identified	Not identified	Not identified	Not identified	Not identified	Not identified	Not identified	Not identified	Not identified	Not identified	Identified	Not identified	Not identified						OR
1065	Female	PharmD	Not identified	Not identified	Not identified	Not identified	Not identified	Not identified	Not identified	Not identified	Not identified	Not identified	Not identified	Not identified	Not identified	Not identified	Not identified	Identified	0	1	0	0	0	ND
4267	Female	BS	Not identified	Not identified	Not identified	Not identified	Not identified	Not identified	Identified	Not identified	Not identified	Identified	Not identified	Not identified	Identified	Not identified	Not identified	Not identified	0	1	0	1	1	CA
2006	Male	PharmD	Identified	Not identified	Not identified	Not identified	Not identified	Not identified	Not identified	Not identified	Not identified	Not identified	Not identified	Not identified	Identified	Not identified	Not identified	Not identified	0	1	0	0	0	SD
5284	Female	PharmD	Not identified	Identified	Not identified	Identified	Not identified	Not identified	Not identified	Identified	Not identified	Identified	Not identified	Not identified	Identified	Not identified	Not identified	Not identified	0	1	0	0	1	WV
5083	Male	PharmD	Not identified	Not identified	Identified	Not identified	Not identified	Not identified	Not identified	Not identified	Not identified	Identified	Not identified	Not identified	Identified	Not identified	Not identified	Not identified	0	1	0	0	0	WV
5504	Male	BS	Identified	Identified	Identified	Identified	Not identified	Not identified	Identified	Identified	Not identified	Identified	Not identified	Not identified	Identified	Not identified	Not identified	Not identified	0	1	0	0	0	WV
5281	Male	BS	Identified	Identified	Identified	Identified	Not identified	Not identified	Identified	Identified	Not identified	Not identified	Not identified	Not identified	Identified	Not identified	Not identified	Not identified	1	1	1	1	1	WV
5233	Female	PharmD	Not identified	Not identified	Not identified	Not identified	Not identified	Not identified	Not identified	Not identified	Not identified	Not identified	Not identified	Not identified	Not identified	Not identified	Identified	Not identified	0	1	0	1	1	WV
5391	Male	BS	Not identified	Not identified	Not identified	Not identified	Not identified	Not identified	Identified	Not identified	Not identified	Identified	Not identified	Not identified	Identified	Not identified	Not identified	Not identified	0	1	0	0	1	WV
2105	Female	PharmD	Not identified	Not identified	Not identified	Not identified	Not identified	Not identified	Not identified	Not identified	Identified	Not identified	Not identified	Not identified	Not identified	Identified	Not identified	Not identified	0	1	0	0	1	SD
5418	Female	PharmD	Identified	Identified	Not identified	Not identified	Not identified	Not identified	Identified	Not identified	Not identified	Not identified	Not identified	Not identified	Not identified	Not identified	Identified	Not identified	0	1	1	0	1	WV
5274	Male	BS	Not identified	Not identified	Not identified	Not identified	Not identified	Not identified	Not identified	Not identified	Not identified	Identified	Not identified	Not identified	Not identified	Not identified	Identified	Not identified	0	1	0	1	0	WV
5218	Female	BS	Not identified	Not identified	Identified	Not identified	Not identified	Not identified	Not identified	Not identified	Not identified	Identified	Not identified	Not identified	Not identified	Identified	Not identified	Not identified	0	1	1	0	0	WV
5266	Female	PharmD	Not identified	Not identified	Not identified	Not identified	Not identified	Not identified	Not identified	Identified	Not identified	Not identified	Not identified	Not identified	Identified	Not identified	Not identified	Not identified	0	1	1	1	1	WV
4006	Female	PharmD	Not identified	Not identified	Identified	Not identified	Not identified	Not identified	Not identified	Not identified	Not identified	Not identified	Not identified	Not identified	Not identified	Identified	Not identified	Not identified	0	0	0	1	1	CA
1032	Male	BS	Not identified	Not identified	Not identified	Not identified	Not identified	Not identified	Not identified	Not identified	Not identified	Identified	Not identified	Not identified	Not identified	Not identified	Not identified	Identified	0	1	0	0	0	ND
5201	Male	BS	Not identified	Not identified	Not identified	Not identified	Not identified	Not identified	Not identified	Not identified	Not identified	Not identified	Not identified	Not identified	Not identified	Not identified	Not identified	Identified	0	1	0	0	0	WV
1050	Female	PharmD	Not identified	Not identified	Not identified	Not identified	Not identified	Not identified	Not identified	Not identified	Not identified	Not identified	Not identified	Not identified	Not identified	Not identified	Not identified	Identified	0	1	0	0	1	ND
5251	Female	BS	Not identified	Not identified	Not identified	Not identified	Not identified	Not identified	Not identified	Not identified	Not identified	Not identified	Not identified	Not identified	Not identified	Identified	Not identified	Not identified	0	1	0	1	1	WV
1090	Female	BS	Not identified	Not identified	Not identified	Not identified	Not identified	Not identified	Not identified	Not identified	Not identified	Identified	Not identified	Not identified	Identified	Not identified	Not identified	Not identified	0	0	1	0	0	ND
5464	Male	BS	Not identified	Not identified	Not identified	Not identified	Not identified	Not identified	Identified	Not identified	Not identified	Identified	Not identified	Not identified	Identified	Not identified	Not identified	Not identified	0	1	1	1	1	WV
5228	Male	PharmD	Not identified	Not identified	Not identified	Not identified	Not identified	Not identified	Not identified	Not identified	Not identified	Identified	Not identified	Not identified	Identified	Not identified	Not identified	Not identified	1	1	1	0	0	WV
5090	Male	BS	Not identified	Not identified	Not identified	Not identified	Not identified	Not identified	Not identified	Not identified	Not identified	Identified	Not identified	Not identified	Not identified	Not identified	Not identified	Identified	0	1	1	0	0	WV
2046	Female	PharmD	Not identified	Not identified	Not identified	Not identified	Not identified	Not identified	Not identified	Not identified	Not identified	Identified	Not identified	Not identified	Not identified	Identified	Not identified	Not identified	0	1	0	0	0	SD
4283	Female	PharmD	Identified	Not identified	Not identified	Identified	Not identified	Not identified	Identified	Not identified	Identified	Identified	Not identified	Not identified	Not identified	Not identified	Not identified	Identified	0	1	0	1	1	CA
4259	Male	PharmD	Identified	Not identified	Identified	Not identified	Not identified	Not identified	Identified	Not identified	Not identified	Identified	Not identified	Not identified	Identified	Not identified	Not identified	Not identified	0	1	0	0	0	CA
5267	Female	PharmD	Not identified	Not identified	Not identified	Not identified	Not identified	Not identified	Not identified	Not identified	Not identified	Not identified	Not identified	Not identified	Identified	Not identified	Not identified	Not identified	0	1	0	0	0	WV
5193	Male	PharmD	Not identified	Not identified	Not identified	Not identified	Not identified	Not identified	Identified	Not identified	Not identified	Identified	Identified	Identified	Identified	Not identified	Not identified	Not identified	0	1	1	1	1	WV
5221	Female	PharmD	Identified	Identified	Not identified	Not identified	Not identified	Not identified	Not identified	Not identified	Not identified	Not identified	Not identified	Not identified	Identified	Not identified	Not identified	Not identified	0	1	0	0	1	WV
5344	Female	BS	Not identified	Not identified	Not identified	Not identified	Not identified	Not identified	Not identified	Not identified	Not identified	Identified	Not identified	Not identified	Not identified	Identified	Not identified	Not identified	0	1	1	0	1	WV
5442	Male	PharmD	Identified	Not identified	Identified	Identified	Not identified	Not identified	Not identified	Identified	Not identified	Not identified	Not identified	Not identified	Identified	Not identified	Not identified	Not identified	0	1	0	0	0	WV
5262	Male	PharmD	Not identified	Not identified	Not identified	Not identified	Not identified	Not identified	Not identified	Not identified	Not identified	Identified	Not identified	Not identified	Identified	Not identified	Not identified	Not identified	0	1	0	0	0	WV
2035	Female	PharmD	Not identified	Not identified	Not identified	Not identified	Not identified	Not identified	Not identified	Not identified	Not identified	Identified	Not identified	Not identified	Not identified	Identified	Not identified	Not identified	0	1	0	0	0	SD
1070	Female	BS	Not identified	Not identified	Identified	Not identified	Not identified	Not identified	Not identified	Not identified	Not identified	Not identified	Not identified	Not identified	Not identified	Identified	Not identified	Not identified	0	1	0	0	0	ND
5049	Female	PharmD	Not identified	Not identified	Not identified	Not identified	Not identified	Not identified	Not identified	Not identified	Not identified	Identified	Not identified	Not identified	Identified	Not identified	Not identified	Not identified	0	1	0	0	1	WV
5386	Female	BS	Not identified	Not identified	Identified	Not identified	Not identified	Not identified	Not identified	Not identified	Not identified	Not identified	Not identified	Not identified	Not identified	Identified	Not identified	Not identified	0	1	1	1	1	WV
5060	Male	BS	Not identified	Not identified	Not identified	Not identified	Not identified	Not identified	Not identified	Not identified	Not identified	Identified	Not identified	Not identified	Not identified	Not identified	Not identified	Identified	0	1	0	0	1	WV
1167	Female	PharmD	Not identified	Not identified	Not identified	Not identified	Not identified	Not identified	Not identified	Not identified	Not identified	Not identified	Not identified	Not identified	Identified	Not identified	Not identified	Not identified	0	1	0	1	1	ND
2045	Female	BS	Not identified	Not identified	Not identified	Not identified	Not identified	Not identified	Not identified	Not identified	Not identified	Not identified	Not identified	Not identified	Identified	Not identified	Not identified	Not identified	0	1	0	0	1	SD
1029	Female	PharmD	Not identified	Not identified	Not identified	Not identified	Not identified	Not identified	Not identified	Not identified	Not identified	Not identified	Not identified	Not identified	Identified	Not identified	Not identified	Not identified	0	0	0	0	0	ND
5517	Female	PharmD	Identified	Identified	Identified	Not identified	Not identified	Not identified	Not identified	Not identified	Not identified	Not identified	Not identified	Not identified	Not identified	Not identified	Not identified	Identified	1	1	0	0	0	WV
5327	Male	BS	Identified	Not identified	Identified	Identified	Not identified	Not identified	Identified	Not identified	Not identified	Not identified	Not identified	Not identified	Identified	Not identified	Not identified	Not identified	0	1	1	0	1	WV
1142	Male	PharmD	Not identified	Not identified	Not identified	Not identified	Not identified	Not identified	Not identified	Not identified	Not identified	Not identified	Not identified	Not identified	Not identified	Not identified	Not identified	Identified	0	1	0	0	0	ND
2008	Female	PharmD	Identified	Not identified	Identified	Not identified	Not identified	Not identified	Identified	Not identified	Not identified	Identified	Not identified	Not identified	Identified	Not identified	Not identified	Not identified	0	1	0	1	0	SD
5490	Female	BS	Identified	Not identified	Identified	Not identified	Not identified	Not identified	Not identified	Not identified	Not identified	Identified	Not identified	Not identified	Not identified	Identified	Not identified	Not identified	1	1	0	0	0	WV
5153	Male	PharmD	Not identified	Not identified	Not identified	Not identified	Not identified	Not identified	Not identified	Not identified	Identified	Not identified	Not identified	Not identified	Not identified	Not identified	Not identified	Identified	0	1	0	0	0	WV
5057	Male	BS	Not identified	Not identified	Not identified	Not identified	Not identified	Not identified	Not identified	Not identified	Not identified	Not identified	Not identified	Not identified	Not identified	Not identified	Identified	Not identified	0	1	0	1	0	WV
1081	Female	PharmD	Not identified	Not identified	Not identified	Not identified	Not identified	Not identified	Not identified	Not identified	Not identified	Not identified	Not identified	Not identified	Not identified	Not identified	Not identified	Identified	0	1	0	1	1	ND
4062	Female	BS	Identified	Identified	Identified	Not identified	Not identified	Not identified	Not identified	Not identified	Not identified	Not identified	Identified	Not identified	Identified	Not identified	Not identified	Not identified	0	1	1	1	1	OR
4272	Female	PharmD	Not identified	Not identified	Not identified	Not identified	Not identified	Not identified	Not identified	Not identified	Not identified	Identified	Not identified	Not identified	Not identified	Not identified	Identified	Not identified						CA
2054	Female	BS	Not identified	Not identified	Not identified	Not identified	Not identified	Not identified	Not identified	Not identified	Not identified	Not identified	Not identified	Not identified	Not identified	Not identified	Identified	Not identified	0	1	0	0	0	SD
4208	Male	BS	Not identified	Not identified	Not identified	Not identified	Not identified	Not identified	Not identified	Not identified	Not identified	Not identified	Not identified	Not identified	Not identified	Not identified	Identified	Not identified	0	0	0	0	0	CA
5074	Male	BS	Not identified	Not identified	Not identified	Not identified	Not identified	Not identified	Not identified	Not identified	Not identified	Identified	Not identified	Not identified	Not identified	Identified	Not identified	Not identified	0	1	0	0	1	WV
5135	Male	PharmD	Identified	Not identified	Identified	Identified	Not identified	Not identified	Not identified	Not identified	Not identified	Not identified	Not identified	Not identified	Not identified	Not identified	Not identified	Identified	0	1	0	0	0	WV
4024	Male	BS	Not identified	Not identified	Not identified	Not identified	Not identified	Not identified	Not identified	Not identified	Not identified	Identified	Not identified	Not identified	Not identified	Not identified	Not identified	Identified	0	1	0	0	0	CA
5359	Male	PharmD	Identified	Not identified	Not identified	Not identified	Not identified	Not identified	Identified	Not identified	Not identified	Not identified	Not identified	Not identified	Identified	Not identified	Not identified	Not identified	0	1	0	0	1	WV
4210	Male	BS	Not identified	Not identified	Not identified	Not identified	Not identified	Not identified	Identified	Not identified	Not identified	Identified	Not identified	Not identified	Identified	Not identified	Not identified	Not identified	0	1	0	0	0	OR
1072	Female	PharmD	Not identified	Not identified	Not identified	Not identified	Not identified	Not identified	Not identified	Not identified	Not identified	Not identified	Not identified	Not identified	Identified	Not identified	Not identified	Not identified	0	1	0	1	1	ND
5291	Male	PharmD	Identified	Identified	Identified	Not identified	Not identified	Not identified	Not identified	Not identified	Not identified	Not identified	Not identified	Not identified	Not identified	Identified	Not identified	Not identified	0	1	0	0	0	WV
4279	Male	PharmD	Identified	Not identified	Not identified	Not identified	Not identified	Not identified	Not identified	Not identified	Not identified	Not identified	Not identified	Not identified	Not identified	Identified	Not identified	Not identified	0	1	0	1	1	CA
1174	Female	PharmD	Not identified	Not identified	Identified	Not identified	Not identified	Not identified	Not identified	Not identified	Not identified	Identified	Not identified	Not identified	Identified	Not identified	Not identified	Not identified	0	1	0	0	0	ND
1008	Female	BS	Identified	Not identified	Not identified	Not identified	Not identified	Not identified	Not identified	Not identified	Not identified	Not identified	Not identified	Not identified	Not identified	Identified	Not identified	Not identified	0	0	0	1	1	ND
5355	Female	PharmD	Not identified	Not identified	Not identified	Not identified	Not identified	Not identified	Not identified	Identified	Not identified	Not identified	Not identified	Not identified	Not identified	Not identified	Identified	Not identified	1	1	0	0	1	WV
5039	Male	PharmD	Not identified	Not identified	Not identified	Not identified	Not identified	Not identified	Not identified	Not identified	Not identified	Not identified	Not identified	Not identified	Identified	Not identified	Not identified	Not identified	1	1	1	0	1	WV
4152	Male	BS	Not identified	Not identified	Not identified	Not identified	Not identified	Not identified	Not identified	Not identified	Not identified	Not identified	Not identified	Not identified	Identified	Not identified	Not identified	Not identified	1	1	0	0	0	OR
1172	Female	PharmD	Not identified	Not identified	Not identified	Not identified	Not identified	Not identified	Not identified	Not identified	Not identified	Identified	Not identified	Not identified	Identified	Not identified	Not identified	Not identified	0	1	0	1	1	ND
5027	Male	PharmD	Not identified	Not identified	Identified	Not identified	Not identified	Not identified	Identified	Not identified	Not identified	Not identified	Not identified	Not identified	Identified	Not identified	Not identified	Not identified	0	1	1	1	1	WV
5484	Female	PharmD	Identified	Identified	Identified	Identified	Not identified	Not identified	Not identified	Identified	Not identified	Not identified	Identified	Not identified	Identified	Not identified	Not identified	Not identified	0	1	1	0	1	WV
5494	Female	PharmD	Identified	Not identified	Identified	Identified	Not identified	Not identified	Identified	Identified	Not identified	Identified	Not identified	Not identified	Not identified	Identified	Not identified	Not identified	0	1	0	0	0	WV
5499	Male	PharmD	Not identified	Not identified	Not identified	Not identified	Not identified	Not identified	Not identified	Not identified	Not identified	Not identified	Not identified	Not identified	Identified	Not identified	Not identified	Not identified	0	1	1	0	0	WV
1098	Male	PharmD	Not identified	Not identified	Identified	Not identified	Not identified	Not identified	Identified	Not identified	Not identified	Identified	Identified	Not identified	Identified	Not identified	Not identified	Not identified	0	0	0	0	0	ND
4156	Male	BS	Identified	Not identified	Not identified	Not identified	Not identified	Not identified	Not identified	Not identified	Not identified	Not identified	Not identified	Not identified	Not identified	Identified	Not identified	Not identified	0	1	1	1	1	CA
5339	Female	BS	Identified	Identified	Identified	Not identified	Not identified	Not identified	Identified	Not identified	Not identified	Identified	Not identified	Not identified	Identified	Not identified	Not identified	Not identified	1	1	1	1	1	WV
5216	Male	BS	Not identified	Not identified	Not identified	Not identified	Not identified	Not identified	Not identified	Not identified	Not identified	Not identified	Not identified	Not identified	Not identified	Identified	Not identified	Not identified	0	1	0	0	0	WV
2178	Male	PharmD	Identified	Not identified	Not identified	Not identified	Not identified	Not identified	Not identified	Not identified	Not identified	Not identified	Not identified	Not identified	Not identified	Not identified	Not identified	Identified	0	1	0	0	0	SD
5238	Female	PharmD	Not identified	Not identified	Not identified	Not identified	Not identified	Not identified	Not identified	Not identified	Not identified	Identified	Not identified	Not identified	Not identified	Identified	Not identified	Not identified	0	1	1	1	1	WV
2005	Female	PharmD	Identified	Identified	Not identified	Not identified	Not identified	Not identified	Not identified	Not identified	Not identified	Not identified	Not identified	Not identified	Identified	Not identified	Not identified	Not identified	0	1	0	0	1	SD
5404	Female	PharmD	Not identified	Not identified	Not identified	Not identified	Not identified	Not identified	Not identified	Not identified	Not identified	Not identified	Not identified	Not identified	Identified	Not identified	Not identified	Not identified	1	1	1	0	1	WV
5429	Male	PharmD	Identified	Not identified	Not identified	Not identified	Not identified	Not identified	Not identified	Not identified	Not identified	Not identified	Not identified	Identified	Not identified	Identified	Not identified	Not identified	0	1	1	1	0	WV
2091	Female	PharmD	Identified	Not identified	Not identified	Not identified	Not identified	Not identified	Not identified	Not identified	Not identified	Not identified	Not identified	Not identified	Identified	Not identified	Not identified	Not identified	0	1	0	1	1	SD
1158	Female	BS	Not identified	Not identified	Not identified	Not identified	Not identified	Not identified	Not identified	Not identified	Not identified	Not identified	Not identified	Not identified	Not identified	Not identified	Not identified	Identified	1	1	1	1	0	ND
2131	Male	PharmD	Identified	Not identified	Not identified	Not identified	Not identified	Not identified	Not identified	Not identified	Not identified	Identified	Not identified	Not identified	Not identified	Identified	Not identified	Not identified	0	1	0	0	1	SD
5243	Female	BS	Not identified	Not identified	Identified	Not identified	Not identified	Not identified	Not identified	Not identified	Not identified	Identified	Not identified	Not identified	Identified	Not identified	Not identified	Not identified	0	1	0	0	0	WV
5476	Male	BS	Identified	Identified	Not identified	Not identified	Not identified	Not identified	Identified	Not identified	Not identified	Identified	Not identified	Not identified	Not identified	Not identified	Not identified	Identified	0	0	0	0	1	WV
2140	Male	BS	Not identified	Not identified	Not identified	Not identified	Not identified	Not identified	Not identified	Not identified	Not identified	Not identified	Not identified	Not identified	Not identified	Identified	Not identified	Not identified	0	0	0	0	0	SD
5427	Female	BS	Not identified	Not identified	Not identified	Not identified	Not identified	Not identified	Not identified	Not identified	Not identified	Not identified	Not identified	Not identified	Not identified	Not identified	Not identified	Identified	0	0	0	0	0	WV
5385	Female	PharmD	Not identified	Not identified	Not identified	Not identified	Not identified	Not identified	Identified	Not identified	Not identified	Identified	Not identified	Not identified	Identified	Not identified	Not identified	Not identified	0	1	1	0	0	WV
5110	Female	PharmD	Not identified	Not identified	Not identified	Not identified	Not identified	Not identified	Not identified	Not identified	Not identified	Identified	Not identified	Not identified	Identified	Not identified	Not identified	Not identified	0	1	0	0	1	WV
2168	Female	BS	Not identified	Not identified	Not identified	Not identified	Not identified	Not identified	Identified	Not identified	Not identified	Identified	Not identified	Not identified	Not identified	Identified	Not identified	Not identified	0	1	1	0	0	SD
5443	Male	PharmD	Not identified	Not identified	Not identified	Not identified	Not identified	Not identified	Identified	Not identified	Not identified	Identified	Not identified	Not identified	Identified	Not identified	Not identified	Not identified	0	1	1	1	1	WV
5446	Male	PharmD	Not identified	Not identified	Not identified	Not identified	Not identified	Not identified	Identified	Not identified	Not identified	Identified	Not identified	Not identified	Not identified	Identified	Not identified	Not identified	0	1	1	0	0	WV
5455	Female	PharmD	Not identified	Not identified	Not identified	Not identified	Not identified	Not identified	Identified	Not identified	Not identified	Identified	Not identified	Not identified	Not identified	Not identified	Identified	Not identified	0	1	1	1	1	WV
5058	Female	BS	Identified	Not identified	Not identified	Identified	Not identified	Not identified	Not identified	Not identified	Not identified	Not identified	Not identified	Not identified	Not identified	Identified	Not identified	Not identified	0	1	0	0	0	WV
2159	Male	PharmD	Not identified	Not identified	Not identified	Not identified	Not identified	Not identified	Identified	Not identified	Not identified	Identified	Identified	Not identified	Identified	Not identified	Not identified	Not identified	0	1	0	1	1	SD
4125	Female	PharmD	Not identified	Not identified	Not identified	Not identified	Not identified	Not identified	Not identified	Not identified	Not identified	Not identified	Not identified	Not identified	Not identified	Identified	Not identified	Not identified						CA
4201	Male	PharmD	Identified	Identified	Not identified	Identified	Not identified	Not identified	Not identified	Not identified	Not identified	Not identified	Not identified	Not identified	Identified	Not identified	Not identified	Not identified	0	1	1	0	1	CA
4277	Male	PharmD	Identified	Not identified	Not identified	Not identified	Not identified	Not identified	Not identified	Not identified	Not identified	Identified	Not identified	Not identified	Identified	Not identified	Not identified	Not identified						CA
5260	Female	PharmD	Not identified	Not identified	Identified	Not identified	Not identified	Not identified	Identified	Not identified	Not identified	Not identified	Not identified	Not identified	Not identified	Not identified	Not identified	Identified	0	1	0	0	0	WV
2067	Male	PharmD	Not identified	Not identified	Not identified	Not identified	Not identified	Not identified	Identified	Not identified	Not identified	Identified	Not identified	Not identified	Identified	Not identified	Not identified	Not identified	0	1	1	1	1	SD
5489	Female	PharmD	Identified	Identified	Identified	Not identified	Not identified	Not identified	Identified	Not identified	Not identified	Not identified	Not identified	Not identified	Not identified	Not identified	Not identified	Identified	0	1	1	1	1	WV
5030	Female	BS	Not identified	Not identified	Not identified	Not identified	Not identified	Not identified	Not identified	Not identified	Not identified	Not identified	Not identified	Not identified	Not identified	Identified	Not identified	Not identified	1	1	0	0	0	WV
5053	Male	BS	Not identified	Not identified	Not identified	Not identified	Not identified	Not identified	Not identified	Not identified	Not identified	Not identified	Not identified	Not identified	Identified	Not identified	Not identified	Not identified	0	1	1	0	1	WV
5360	Male	BS	Identified	Not identified	Not identified	Not identified	Not identified	Not identified	Not identified	Not identified	Not identified	Identified	Not identified	Not identified	Identified	Not identified	Not identified	Not identified	0	1	1	1	1	WV
2027	Female	BS	Not identified	Not identified	Not identified	Not identified	Not identified	Not identified	Not identified	Not identified	Not identified	Not identified	Not identified	Not identified	Not identified	Identified	Not identified	Not identified	0	1	1	0	1	SD
5447	Female	BS	Not identified	Not identified	Not identified	Not identified	Not identified	Not identified	Identified	Not identified	Not identified	Identified	Not identified	Not identified	Not identified	Not identified	Identified	Not identified	0	1	0	1	1	WV
1095	Male	PharmD	Identified	Identified	Not identified	Not identified	Not identified	Not identified	Not identified	Not identified	Not identified	Not identified	Not identified	Not identified	Identified	Not identified	Not identified	Not identified	0	1	1	0	1	ND
2170	Male	PharmD	Not identified	Not identified	Not identified	Not identified	Not identified	Not identified	Not identified	Not identified	Not identified	Identified	Not identified	Not identified	Not identified	Identified	Not identified	Not identified	0	1	1	0	1	SD
5075	Male	BS	Identified	Not identified	Not identified	Not identified	Not identified	Not identified	Identified	Not identified	Not identified	Identified	Not identified	Not identified	Identified	Not identified	Not identified	Not identified	0	1	0	0	1	WV
1005	Male	BS	Not identified	Not identified	Not identified	Not identified	Not identified	Not identified	Not identified	Not identified	Not identified	Not identified	Not identified	Not identified	Not identified	Not identified	Not identified	Identified	1	0	0	0	0	ND
5416	Female	PharmD	Not identified	Not identified	Not identified	Not identified	Not identified	Not identified	Identified	Not identified	Not identified	Not identified	Not identified	Not identified	Not identified	Identified	Not identified	Not identified	0	1	1	0	1	WV
4241	Female	BS	Not identified	Not identified	Not identified	Not identified	Not identified	Not identified	Not identified	Not identified	Not identified	Not identified	Not identified	Not identified	Identified	Not identified	Not identified	Not identified	0	1	0	0	0	OR
2132	Male	PharmD	Identified	Identified	Not identified	Not identified	Not identified	Not identified	Not identified	Not identified	Not identified	Not identified	Not identified	Not identified	Identified	Not identified	Not identified	Not identified	0	1	1	0	1	SD
5035	Female	BS	Not identified	Not identified	Not identified	Not identified	Not identified	Not identified	Not identified	Not identified	Not identified	Not identified	Not identified	Not identified	Identified	Not identified	Not identified	Not identified	0	1	1	1	0	WV
5382	Female	PharmD	Not identified	Not identified	Not identified	Not identified	Not identified	Not identified	Identified	Not identified	Not identified	Not identified	Not identified	Not identified	Not identified	Identified	Not identified	Not identified	0	0	0	0	0	WV
5127	Male	BS	Not identified	Not identified	Not identified	Not identified	Not identified	Not identified	Not identified	Not identified	Not identified	Not identified	Not identified	Not identified	Not identified	Not identified	Not identified	Identified	0	1	0	0	1	WV
1104	Female	PharmD	Not identified	Not identified	Not identified	Not identified	Not identified	Not identified	Not identified	Not identified	Not identified	Identified	Not identified	Not identified	Not identified	Identified	Not identified	Not identified	0	1	0	0	0	ND
4263	Female	PharmD	Not identified	Not identified	Not identified	Not identified	Not identified	Not identified	Not identified	Not identified	Not identified	Not identified	Not identified	Not identified	Not identified	Not identified	Identified	Not identified	0	1	0	0	0	CA
4114	Male	BS	Not identified	Not identified	Not identified	Not identified	Not identified	Not identified	Identified	Not identified	Not identified	Not identified	Not identified	Not identified	Not identified	Identified	Not identified	Not identified	0	1	0	0	0	CA
5045	Female	BS	Not identified	Not identified	Not identified	Not identified	Not identified	Not identified	Not identified	Not identified	Not identified	Not identified	Not identified	Not identified	Not identified	Identified	Not identified	Not identified						WV
1120	Female	PharmD	Not identified	Not identified	Not identified	Not identified	Not identified	Not identified	Not identified	Not identified	Not identified	Not identified	Not identified	Not identified	Not identified	Not identified	Not identified	Identified	0	0	0	0	0	ND
1017	Female	PharmD	Not identified	Not identified	Not identified	Not identified	Not identified	Not identified	Not identified	Not identified	Identified	Not identified	Not identified	Not identified	Not identified	Identified	Not identified	Not identified	0	1	1	1	1	ND
4119	Male	BS	Not identified	Not identified	Not identified	Not identified	Not identified	Not identified	Not identified	Not identified	Not identified	Not identified	Not identified	Not identified	Not identified	Identified	Not identified	Not identified	1	1	1	0	1	CA
1097	Male	PharmD	Not identified	Not identified	Not identified	Not identified	Not identified	Not identified	Not identified	Not identified	Not identified	Not identified	Not identified	Not identified	Not identified	Not identified	Not identified	Identified	1	1	0	0	1	ND
2085	Female	PharmD	Not identified	Not identified	Not identified	Not identified	Not identified	Not identified	Identified	Not identified	Not identified	Not identified	Not identified	Not identified	Identified	Not identified	Not identified	Not identified	0	1	0	0	0	SD
5123	Male	BS	Not identified	Not identified	Not identified	Not identified	Not identified	Not identified	Not identified	Not identified	Not identified	Not identified	Not identified	Not identified	Not identified	Not identified	Not identified	Identified	0	0	0	0	0	WV
1033	Male	BS	Identified	Not identified	Not identified	Not identified	Not identified	Not identified	Not identified	Not identified	Not identified	Not identified	Not identified	Not identified	Not identified	Not identified	Not identified	Identified	0	1	0	0	0	ND
5406	Female	PharmD	Not identified	Not identified	Not identified	Identified	Not identified	Not identified	Not identified	Identified	Not identified	Identified	Not identified	Not identified	Identified	Not identified	Not identified	Not identified						WV
2146	Female	PharmD	Not identified	Not identified	Not identified	Not identified	Not identified	Not identified	Identified	Not identified	Not identified	Not identified	Not identified	Not identified	Not identified	Identified	Not identified	Not identified	0	1	0	0	0	SD
2179	Male	BS	Not identified	Not identified	Not identified	Not identified	Not identified	Not identified	Not identified	Not identified	Not identified	Not identified	Not identified	Not identified	Not identified	Identified	Not identified	Not identified	0	1	0	0	0	SD
5236	Female	BS	Not identified	Not identified	Not identified	Not identified	Not identified	Not identified	Not identified	Not identified	Not identified	Not identified	Not identified	Not identified	Not identified	Not identified	Not identified	Identified	0	1	1	0	0	WV
1108	Female	PharmD	Not identified	Not identified	Not identified	Not identified	Not identified	Not identified	Not identified	Not identified	Not identified	Not identified	Not identified	Not identified	Not identified	Identified	Not identified	Not identified	0	1	0	0	0	ND
2044	Male	BS	Identified	Not identified	Not identified	Not identified	Not identified	Not identified	Not identified	Not identified	Not identified	Not identified	Not identified	Identified	Not identified	Identified	Not identified	Not identified	1	1	1	0	1	SD
1085	Male	PharmD	Not identified	Not identified	Identified	Not identified	Not identified	Not identified	Not identified	Not identified	Not identified	Identified	Not identified	Not identified	Identified	Not identified	Not identified	Not identified	0	1	0	0	1	ND
5486	Female	PharmD	Not identified	Not identified	Not identified	Not identified	Not identified	Not identified	Identified	Not identified	Not identified	Identified	Not identified	Not identified	Identified	Not identified	Not identified	Not identified	0	1	0	0	1	WV
5396	Female	PharmD	Not identified	Not identified	Not identified	Not identified	Not identified	Not identified	Not identified	Not identified	Not identified	Not identified	Not identified	Not identified	Identified	Not identified	Not identified	Not identified	0	1	0	1	0	WV
4205	Male	BS	Not identified	Not identified	Not identified	Not identified	Not identified	Not identified	Not identified	Not identified	Not identified	Identified	Not identified	Not identified	Not identified	Identified	Not identified	Not identified	0	1	1	0	0	CA
2080	Female	BS	Not identified	Not identified	Not identified	Not identified	Not identified	Not identified	Not identified	Not identified	Not identified	Not identified	Not identified	Not identified	Identified	Not identified	Not identified	Not identified	1	1	1	1	1	SD
4093	Female	PharmD	Identified	Identified	Not identified	Not identified	Not identified	Not identified	Not identified	Not identified	Not identified	Not identified	Not identified	Not identified	Identified	Not identified	Not identified	Not identified	0	1	1	0	0	CA
5326	Female	PharmD	Identified	Identified	Identified	Not identified	Not identified	Not identified	Identified	Not identified	Not identified	Not identified	Not identified	Not identified	Not identified	Identified	Not identified	Not identified	1	1	1	1	1	WV
1164	Male	BS	Not identified	Not identified	Not identified	Not identified	Not identified	Not identified	Identified	Not identified	Not identified	Identified	Not identified	Not identified	Not identified	Identified	Not identified	Not identified	0	1	0	0	0	ND
5488	Male	PharmD	Not identified	Not identified	Not identified	Identified	Identified	Not identified	Identified	Identified	Not identified	Not identified	Not identified	Not identified	Identified	Not identified	Not identified	Not identified	0	1	1	1	1	WV
5050	Female	BS	Identified	Not identified	Not identified	Not identified	Not identified	Not identified	Not identified	Not identified	Not identified	Not identified	Not identified	Not identified	Not identified	Identified	Not identified	Not identified	0	1	0	0	1	WV
4043	Female	PharmD	Not identified	Not identified	Identified	Not identified	Not identified	Not identified	Identified	Not identified	Not identified	Identified	Not identified	Not identified	Identified	Not identified	Not identified	Not identified	1	1	1	1	1	OR
4264	Female	BS	Identified	Identified	Identified	Not identified	Not identified	Not identified	Not identified	Not identified	Not identified	Not identified	Not identified	Not identified	Not identified	Identified	Not identified	Not identified	0	1	0	1	0	CA
4207	Female	BS	Identified	Identified	Not identified	Not identified	Not identified	Not identified	Identified	Not identified	Not identified	Identified	Not identified	Not identified	Identified	Not identified	Not identified	Not identified	0	1	0	0	0	CA
5328	Male	PharmD	Not identified	Not identified	Not identified	Not identified	Not identified	Not identified	Identified	Not identified	Not identified	Identified	Not identified	Not identified	Not identified	Identified	Not identified	Not identified	1	1	1	0	0	WV
5400	Female	BS	Identified	Identified	Not identified	Not identified	Not identified	Not identified	Identified	Not identified	Not identified	Identified	Not identified	Not identified	Not identified	Not identified	Not identified	Identified	0	1	1	0	1	WV
4255	Male	PharmD	Not identified	Not identified	Not identified	Not identified	Not identified	Not identified	Identified	Not identified	Not identified	Identified	Not identified	Not identified	Identified	Not identified	Not identified	Not identified	0	1	0	0	1	CA
4146	Female	PharmD	Identified	Not identified	Not identified	Not identified	Not identified	Not identified	Not identified	Not identified	Not identified	Not identified	Not identified	Not identified	Not identified	Identified	Not identified	Not identified	0	1	0	0	1	CA
5258	Female	PharmD	Identified	Not identified	Not identified	Not identified	Not identified	Not identified	Not identified	Not identified	Not identified	Identified	Not identified	Not identified	Identified	Not identified	Not identified	Not identified	0	1	1	0	1	WV
2020	Male	PharmD	Not identified	Not identified	Not identified	Not identified	Not identified	Not identified	Not identified	Not identified	Not identified	Identified	Identified	Not identified	Identified	Not identified	Not identified	Not identified	0	1	1	0	0	SD
4227	Female	PharmD	Not identified	Not identified	Not identified	Not identified	Not identified	Not identified	Not identified	Not identified	Not identified	Not identified	Not identified	Not identified	Not identified	Identified	Not identified	Not identified	0	1	0	0	1	OR
5280	Female	PharmD	Identified	Not identified	Identified	Not identified	Not identified	Not identified	Identified	Identified	Not identified	Not identified	Not identified	Not identified	Identified	Not identified	Not identified	Not identified	1	1	1	0	1	WV
5283	Male	BS	Identified	Not identified	Not identified	Not identified	Not identified	Not identified	Not identified	Not identified	Not identified	Not identified	Not identified	Not identified	Identified	Not identified	Not identified	Not identified	1	1	1	1	0	WV
5019	Male	BS	Not identified	Not identified	Not identified	Not identified	Not identified	Not identified	Identified	Not identified	Not identified	Not identified	Not identified	Not identified	Identified	Not identified	Not identified	Not identified	1	0	1	1	0	WV
5295	Male	PharmD	Identified	Not identified	Not identified	Not identified	Not identified	Not identified	Identified	Not identified	Not identified	Identified	Not identified	Not identified	Identified	Not identified	Not identified	Not identified	1	1	0	1	0	WV
5043	Male	PharmD	Not identified	Not identified	Not identified	Not identified	Not identified	Not identified	Not identified	Identified	Not identified	Identified	Identified	Identified	Not identified	Not identified	Identified	Not identified	0	1	1	1	1	WV
1117	Female	PharmD	Not identified	Not identified	Not identified	Not identified	Not identified	Not identified	Identified	Not identified	Not identified	Identified	Identified	Not identified	Not identified	Not identified	Not identified	Identified	0	1	0	0	1	ND
5212	Male	PharmD	Identified	Not identified	Identified	Identified	Not identified	Not identified	Not identified	Identified	Not identified	Not identified	Not identified	Not identified	Not identified	Identified	Not identified	Not identified	1	1	1	1	1	WV
1056	Male	PharmD	Identified	Not identified	Not identified	Not identified	Not identified	Not identified	Identified	Not identified	Not identified	Not identified	Not identified	Not identified	Identified	Not identified	Not identified	Not identified	0	1	0	0	0	ND
5001	Female	PharmD	Identified	Not identified	Not identified	Not identified	Not identified	Not identified	Not identified	Not identified	Not identified	Not identified	Not identified	Not identified	Identified	Not identified	Not identified	Not identified	0	1	0	0	0	WV
1137	Female	BS	Not identified	Not identified	Not identified	Not identified	Not identified	Not identified	Not identified	Not identified	Not identified	Not identified	Not identified	Not identified	Not identified	Identified	Not identified	Not identified	0	1	0	0	0	ND
5306	Female	PharmD	Identified	Not identified	Not identified	Not identified	Not identified	Not identified	Not identified	Not identified	Not identified	Identified	Not identified	Not identified	Not identified	Not identified	Identified	Not identified	0	1	0	0	1	WV
4089	Male	PharmD	Not identified	Not identified	Not identified	Not identified	Not identified	Not identified	Not identified	Not identified	Not identified	Not identified	Not identified	Not identified	Not identified	Not identified	Not identified	Identified	1	1	0	1	0	CA
5269	Female	PharmD	Identified	Identified	Not identified	Not identified	Not identified	Not identified	Not identified	Identified	Not identified	Not identified	Not identified	Not identified	Not identified	Identified	Not identified	Not identified	1	1	0	0	0	WV
4249	Male	BS	Not identified	Not identified	Not identified	Not identified	Not identified	Not identified	Not identified	Not identified	Not identified	Identified	Not identified	Not identified	Not identified	Identified	Not identified	Not identified	0	1	0	1	0	CA
4164	Female	PharmD	Not identified	Not identified	Identified	Not identified	Not identified	Not identified	Not identified	Not identified	Not identified	Identified	Not identified	Not identified	Not identified	Not identified	Not identified	Identified	0	0	0	0	0	CA
5436	Female	PharmD	Not identified	Not identified	Not identified	Not identified	Not identified	Not identified	Not identified	Not identified	Not identified	Not identified	Not identified	Not identified	Identified	Not identified	Not identified	Not identified	0	1	1	0	1	WV
2158	Female	PharmD	Identified	Not identified	Not identified	Identified	Not identified	Not identified	Not identified	Not identified	Not identified	Not identified	Not identified	Not identified	Identified	Not identified	Not identified	Not identified	0	1	0	0	0	SD
4240	Male	PharmD	Identified	Identified	Identified	Not identified	Not identified	Not identified	Not identified	Not identified	Not identified	Not identified	Not identified	Not identified	Not identified	Not identified	Not identified	Identified	0	1	0	1	1	OR
4188	Female	PharmD	Not identified	Not identified	Not identified	Not identified	Not identified	Not identified	Not identified	Not identified	Not identified	Not identified	Not identified	Not identified	Identified	Not identified	Not identified	Not identified	0	1	0	0	0	CA
5272	Female	BS	Identified	Not identified	Not identified	Identified	Not identified	Not identified	Not identified	Not identified	Not identified	Not identified	Not identified	Not identified	Not identified	Identified	Not identified	Not identified	1	1	0	1	1	WV
5154	Female	BS	Identified	Not identified	Not identified	Not identified	Not identified	Not identified	Identified	Not identified	Not identified	Not identified	Not identified	Not identified	Not identified	Identified	Not identified	Not identified	0	1	0	0	0	WV
5150	Female	BS	Not identified	Not identified	Identified	Not identified	Not identified	Not identified	Not identified	Not identified	Not identified	Not identified	Not identified	Not identified	Not identified	Not identified	Not identified	Identified	0	1	0	0	0	WV
5516	Male	PharmD	Not identified	Not identified	Not identified	Identified	Not identified	Not identified	Not identified	Not identified	Not identified	Identified	Not identified	Not identified	Identified	Not identified	Not identified	Not identified	0	0	0	0	1	WV
5485	Female	PharmD	Not identified	Not identified	Not identified	Identified	Not identified	Not identified	Not identified	Identified	Not identified	Not identified	Not identified	Not identified	Not identified	Not identified	Not identified	Identified	0	1	1	0	0	WV
5031	Female	PharmD	Not identified	Not identified	Not identified	Not identified	Not identified	Not identified	Not identified	Not identified	Not identified	Not identified	Not identified	Not identified	Identified	Not identified	Not identified	Not identified	0	1	0	0	0	WV
5230	Male	BS	Not identified	Not identified	Not identified	Not identified	Not identified	Not identified	Not identified	Not identified	Not identified	Identified	Identified	Not identified	Identified	Not identified	Not identified	Not identified	1	1	1	1	1	WV
2118	Male	BS	Identified	Identified	Identified	Not identified	Not identified	Not identified	Identified	Not identified	Not identified	Identified	Identified	Not identified	Not identified	Not identified	Not identified	Identified	0	1	0	0	1	SD
5209	Male	PharmD	Not identified	Not identified	Not identified	Not identified	Not identified	Not identified	Not identified	Not identified	Not identified	Not identified	Not identified	Not identified	Identified	Not identified	Not identified	Not identified	0	1	0	0	1	WV
5318	Male	PharmD	Not identified	Not identified	Not identified	Not identified	Not identified	Not identified	Not identified	Not identified	Not identified	Not identified	Not identified	Not identified	Identified	Not identified	Not identified	Not identified	0	1	0	0	0	WV
1067	Female	PharmD	Not identified	Not identified	Not identified	Not identified	Not identified	Not identified	Not identified	Not identified	Not identified	Not identified	Not identified	Not identified	Identified	Not identified	Not identified	Not identified	0	1	1	0	0	ND
4122	Male	PharmD	Identified	Not identified	Not identified	Not identified	Not identified	Not identified	Not identified	Not identified	Not identified	Not identified	Not identified	Not identified	Identified	Not identified	Not identified	Not identified	0	1	1	1	1	CA
2154	Female	PharmD	Not identified	Not identified	Not identified	Not identified	Not identified	Not identified	Not identified	Not identified	Not identified	Not identified	Not identified	Not identified	Not identified	Identified	Not identified	Not identified	0	1	0	0	0	SD
2004	Male	BS	Not identified	Not identified	Not identified	Not identified	Not identified	Not identified	Not identified	Not identified	Not identified	Identified	Not identified	Not identified	Not identified	Identified	Not identified	Not identified	0	1	0	0	0	SD
5184	Female	BS	Not identified	Not identified	Not identified	Not identified	Not identified	Not identified	Not identified	Not identified	Not identified	Identified	Not identified	Not identified	Identified	Not identified	Not identified	Not identified	0	1	1	0	0	WV
5102	Male	BS	Not identified	Not identified	Not identified	Not identified	Not identified	Not identified	Identified	Not identified	Not identified	Identified	Not identified	Not identified	Identified	Not identified	Not identified	Not identified	0	1	0	1	0	WV
1134	Male	BS	Not identified	Not identified	Not identified	Not identified	Not identified	Not identified	Not identified	Not identified	Not identified	Identified	Not identified	Not identified	Not identified	Not identified	Identified	Not identified	0	1	0	0	0	ND
5288	Female	BS	Not identified	Not identified	Not identified	Not identified	Not identified	Not identified	Not identified	Not identified	Not identified	Not identified	Not identified	Not identified	Not identified	Not identified	Not identified	Identified	1	1	1	1	1	WV
5319	Male	PharmD	Identified	Identified	Not identified	Identified	Not identified	Not identified	Not identified	Not identified	Not identified	Not identified	Not identified	Not identified	Identified	Not identified	Not identified	Not identified	1	1	0	0	0	WV
2106	Female	BS	Not identified	Not identified	Not identified	Identified	Not identified	Not identified	Not identified	Not identified	Not identified	Not identified	Not identified	Not identified	Not identified	Identified	Not identified	Not identified	0	1	0	0	0	SD
4238	Male	BS	Not identified	Not identified	Identified	Identified	Not identified	Not identified	Identified	Identified	Not identified	Identified	Not identified	Not identified	Not identified	Not identified	Identified	Not identified	0	1	0	0	0	OR
5164	Female	PharmD	Not identified	Not identified	Not identified	Identified	Not identified	Not identified	Not identified	Identified	Not identified	Identified	Not identified	Not identified	Not identified	Not identified	Identified	Not identified	0	1	1	1	1	WV
2022	Female	PharmD	Identified	Not identified	Not identified	Not identified	Not identified	Not identified	Not identified	Identified	Not identified	Not identified	Not identified	Not identified	Not identified	Not identified	Not identified	Identified	0	1	1	0	0	SD
5256	Female	PharmD	Not identified	Not identified	Not identified	Not identified	Not identified	Not identified	Not identified	Identified	Not identified	Not identified	Not identified	Not identified	Not identified	Identified	Not identified	Not identified	0	1	0	0	0	WV
1145	Male	PharmD	Not identified	Not identified	Not identified	Not identified	Not identified	Not identified	Not identified	Not identified	Not identified	Not identified	Not identified	Not identified	Not identified	Not identified	Not identified	Identified	0	1	0	1	0	ND
4113	Female	BS	Not identified	Not identified	Not identified	Not identified	Not identified	Not identified	Identified	Not identified	Not identified	Identified	Not identified	Not identified	Not identified	Identified	Not identified	Not identified	0	1	0	1	1	OR
2162	Female	BS	Not identified	Not identified	Not identified	Not identified	Not identified	Not identified	Not identified	Not identified	Not identified	Identified	Not identified	Not identified	Not identified	Not identified	Not identified	Not identified	0	1	0	0	0	SD
5379	Female	PharmD	Not identified	Not identified	Not identified	Not identified	Not identified	Not identified	Not identified	Not identified	Not identified	Not identified	Not identified	Not identified	Not identified	Not identified	Not identified	Identified	0	1	0	1	1	WV
5312	Female	BS	Identified	Identified	Not identified	Not identified	Not identified	Not identified	Not identified	Not identified	Not identified	Not identified	Not identified	Not identified	Not identified	Identified	Not identified	Not identified	1	1	0	0	0	WV
2167	Female	PharmD	Identified	Identified	Identified	Not identified	Not identified	Not identified	Not identified	Not identified	Not identified	Not identified	Not identified	Not identified	Not identified	Identified	Not identified	Not identified	0	1	0	0	1	SD
1154	Female	PharmD	Not identified	Not identified	Not identified	Not identified	Not identified	Not identified	Not identified	Not identified	Not identified	Not identified	Not identified	Not identified	Not identified	Not identified	Not identified	Identified	0	1	0	0	1	ND
5445	Male	BS	Not identified	Not identified	Not identified	Not identified	Not identified	Not identified	Identified	Not identified	Not identified	Identified	Not identified	Not identified	Not identified	Not identified	Identified	Not identified	0	1	1	1	1	WV
1066	Female	PharmD	Not identified	Not identified	Not identified	Not identified	Not identified	Not identified	Not identified	Not identified	Not identified	Identified	Not identified	Not identified	Identified	Not identified	Not identified	Not identified	0	1	0	0	0	ND
5141	Male	PharmD	Identified	Not identified	Not identified	Not identified	Not identified	Not identified	Not identified	Not identified	Not identified	Identified	Not identified	Not identified	Identified	Not identified	Not identified	Not identified	0	1	0	0	1	WV
5163	Female	BS	Not identified	Not identified	Not identified	Not identified	Not identified	Not identified	Identified	Not identified	Not identified	Identified	Not identified	Not identified	Not identified	Identified	Not identified	Not identified	0	1	0	1	1	WV
5276	Female	PharmD	Not identified	Not identified	Not identified	Not identified	Not identified	Not identified	Identified	Not identified	Not identified	Identified	Not identified	Not identified	Not identified	Identified	Not identified	Not identified	0	1	1	0	1	WV
2130	Female	PharmD	Identified	Identified	Identified	Not identified	Not identified	Not identified	Identified	Not identified	Identified	Not identified	Identified	Not identified	Not identified	Not identified	Not identified	Identified	0	1	0	0	0	SD
4118	Female	PharmD	Identified	Not identified	Identified	Not identified	Not identified	Not identified	Not identified	Not identified	Not identified	Not identified	Not identified	Identified	Not identified	Identified	Not identified	Not identified	0	1	0	0	0	CA
5174	Male	PharmD	Not identified	Not identified	Not identified	Identified	Not identified	Not identified	Not identified	Identified	Not identified	Not identified	Not identified	Not identified	Identified	Not identified	Not identified	Not identified	1	1	0	1	1	WV
1027	Male	PharmD	Identified	Identified	Not identified	Not identified	Not identified	Not identified	Not identified	Not identified	Not identified	Not identified	Not identified	Not identified	Not identified	Identified	Not identified	Not identified	1	1	1	0	0	ND
1035	Male	PharmD	Not identified	Not identified	Not identified	Not identified	Not identified	Not identified	Not identified	Not identified	Not identified	Not identified	Not identified	Not identified	Not identified	Not identified	Identified	Not identified						ND
4245	Male	BS	Not identified	Not identified	Not identified	Not identified	Not identified	Not identified	Not identified	Not identified	Not identified	Not identified	Not identified	Not identified	Not identified	Identified	Not identified	Not identified	1	1	0	0	1	OR
5394	Male	BS	Not identified	Not identified	Identified	Not identified	Not identified	Not identified	Not identified	Not identified	Not identified	Not identified	Not identified	Not identified	Identified	Not identified	Not identified	Not identified	1	1	0	0	1	WV
5292	Female	PharmD	Identified	Not identified	Not identified	Not identified	Not identified	Not identified	Identified	Not identified	Not identified	Not identified	Not identified	Not identified	Identified	Not identified	Not identified	Not identified	0	1	0	0	1	WV
5378	Male	BS	Identified	Not identified	Not identified	Not identified	Not identified	Not identified	Not identified	Not identified	Not identified	Not identified	Not identified	Not identified	Identified	Not identified	Not identified	Not identified	0	1	1	0	1	WV
5106	Female	BS	Not identified	Not identified	Not identified	Not identified	Not identified	Not identified	Not identified	Not identified	Not identified	Not identified	Not identified	Not identified	Identified	Not identified	Not identified	Not identified	0	1	1	0	0	WV
5250	Female	BS	Identified	Identified	Identified	Identified	Not identified	Not identified	Identified	Identified	Not identified	Identified	Not identified	Not identified	Identified	Not identified	Not identified	Not identified	0	1	1	0	0	WV
5347	Female	PharmD	Not identified	Identified	Identified	Not identified	Not identified	Not identified	Not identified	Not identified	Not identified	Not identified	Not identified	Not identified	Not identified	Identified	Not identified	Not identified	1	1	0	1	0	WV
5373	Male	PharmD	Identified	Not identified	Identified	Not identified	Not identified	Not identified	Not identified	Not identified	Not identified	Not identified	Not identified	Not identified	Not identified	Not identified	Not identified	Identified	0	1	0	0	0	WV
5493	Male	BS	Not identified	Not identified	Not identified	Not identified	Not identified	Not identified	Not identified	Not identified	Not identified	Not identified	Not identified	Not identified	Identified	Not identified	Not identified	Not identified	0	1	1	1	1	WV
4231	Male	PharmD	Identified	Not identified	Not identified	Not identified	Not identified	Not identified	Identified	Not identified	Not identified	Identified	Not identified	Not identified	Not identified	Not identified	Identified	Not identified	0	1	0	0	0	CA
2057	Female	PharmD	Not identified	Not identified	Not identified	Not identified	Not identified	Not identified	Identified	Not identified	Not identified	Identified	Identified	Not identified	Identified	Not identified	Not identified	Not identified	0	1	0	0	0	SD
2043	Female	PharmD	Not identified	Not identified	Not identified	Not identified	Not identified	Not identified	Not identified	Not identified	Not identified	Not identified	Not identified	Not identified	Not identified	Identified	Not identified	Not identified	0	1	0	0	0	SD
4004	Male	PharmD	Not identified	Not identified	Not identified	Not identified	Not identified	Not identified	Identified	Not identified	Not identified	Identified	Not identified	Not identified	Identified	Not identified	Not identified	Not identified	0	1	0	0	0	CA
5222	Female	PharmD	Not identified	Not identified	Not identified	Not identified	Not identified	Not identified	Not identified	Not identified	Not identified	Not identified	Not identified	Not identified	Identified	Not identified	Not identified	Not identified	0	1	0	0	0	WV
5468	Female	PharmD	Identified	Identified	Not identified	Not identified	Not identified	Not identified	Identified	Not identified	Not identified	Not identified	Not identified	Not identified	Identified	Not identified	Not identified	Not identified	0	1	1	1	1	WV
4070	Male	PharmD	Not identified	Not identified	Not identified	Not identified	Not identified	Not identified	Identified	Not identified	Not identified	Not identified	Identified	Not identified	Identified	Not identified	Not identified	Not identified	0	1	0	0	1	CA
2064	Female	BS	Not identified	Not identified	Not identified	Not identified	Not identified	Not identified	Not identified	Not identified	Not identified	Not identified	Not identified	Not identified	Identified	Not identified	Not identified	Not identified	0	1	1	0	1	SD
4224	Male	BS	Not identified	Not identified	Not identified	Not identified	Not identified	Not identified	Not identified	Not identified	Not identified	Not identified	Not identified	Not identified	Not identified	Not identified	Not identified	Identified	1	1	0	0	0	OR
2066	Male	PharmD	Not identified	Not identified	Not identified	Not identified	Not identified	Not identified	Not identified	Not identified	Not identified	Not identified	Not identified	Not identified	Not identified	Not identified	Not identified	Not identified	0	0	0	0	0	SD
5290	Male	PharmD	Identified	Identified	Identified	Not identified	Not identified	Not identified	Not identified	Identified	Not identified	Not identified	Not identified	Not identified	Not identified	Identified	Not identified	Not identified	0	1	0	1	0	WV
5459	Male	PharmD	Identified	Not identified	Not identified	Not identified	Not identified	Not identified	Not identified	Not identified	Not identified	Not identified	Not identified	Not identified	Identified	Not identified	Not identified	Not identified	1	1	1	1	1	WV
5062	Male	BS	Not identified	Not identified	Not identified	Not identified	Not identified	Not identified	Not identified	Not identified	Not identified	Not identified	Not identified	Not identified	Not identified	Identified	Not identified	Not identified	1	1	1	0	1	WV
5402	Female	PharmD	Not identified	Not identified	Not identified	Identified	Not identified	Not identified	Identified	Not identified	Not identified	Not identified	Not identified	Not identified	Not identified	Not identified	Identified	Not identified	0	1	1	0	0	WV
5383	Female	PharmD	Identified	Not identified	Not identified	Not identified	Not identified	Not identified	Not identified	Not identified	Not identified	Not identified	Not identified	Not identified	Identified	Not identified	Not identified	Not identified	0	1	0	0	1	WV
5104	Female	PharmD	Identified	Not identified	Identified	Not identified	Not identified	Not identified	Not identified	Not identified	Not identified	Not identified	Not identified	Not identified	Identified	Not identified	Not identified	Not identified	0	1	0	1	1	WV
1023	Female	BS	Identified	Not identified	Not identified	Not identified	Not identified	Not identified	Not identified	Not identified	Not identified	Not identified	Not identified	Not identified	Not identified	Not identified	Not identified	Identified	0	1	1	1	0	ND
2070	Female	BS	Identified	Not identified	Not identified	Not identified	Not identified	Not identified	Not identified	Not identified	Not identified	Identified	Not identified	Not identified	Not identified	Identified	Not identified	Not identified	0	1	0	0	0	SD
1102	Male	BS	Not identified	Not identified	Not identified	Not identified	Not identified	Not identified	Not identified	Not identified	Not identified	Not identified	Not identified	Not identified	Identified	Not identified	Not identified	Not identified	0	1	0	0	0	ND
4280	Male	PharmD	Identified	Not identified	Not identified	Not identified	Not identified	Not identified	Identified	Not identified	Not identified	Identified	Not identified	Not identified	Identified	Not identified	Not identified	Not identified	1	1	1	0	0	CA
5293	Female	PharmD	Identified	Identified	Not identified	Identified	Not identified	Not identified	Identified	Not identified	Not identified	Identified	Not identified	Not identified	Identified	Not identified	Not identified	Not identified	0	1	0	0	0	WV
5449	Female	PharmD	Identified	Not identified	Not identified	Not identified	Not identified	Not identified	Not identified	Not identified	Not identified	Not identified	Not identified	Not identified	Identified	Not identified	Not identified	Not identified	0	1	1	0	1	WV
4092	Female	PharmD	Not identified	Not identified	Not identified	Not identified	Not identified	Not identified	Not identified	Not identified	Not identified	Identified	Not identified	Not identified	Identified	Not identified	Not identified	Not identified	0	1	0	1	0	CA
5132	Male	BS	Not identified	Not identified	Not identified	Not identified	Not identified	Not identified	Not identified	Not identified	Not identified	Not identified	Not identified	Not identified	Not identified	Not identified	Not identified	Identified						WV
5424	Male	BS													Not identified	Not identified	Not identified	Identified						WV
5345	Female	BS	Not identified	Not identified	Not identified	Not identified	Not identified	Not identified	Identified	Not identified	Not identified	Identified	Not identified	Not identified	Identified	Not identified	Not identified	Not identified	1	1	1	1	1	WV
5126	Female	PharmD	Identified	Not identified	Identified	Not identified	Not identified	Not identified	Not identified	Not identified	Not identified	Not identified	Not identified	Identified	Identified	Not identified	Not identified	Not identified	0	1	0	0	0	WV
1150	Male	PharmD	Not identified	Not identified	Identified	Not identified	Not identified	Not identified	Not identified	Not identified	Not identified	Identified	Identified	Not identified	Identified	Not identified	Not identified	Not identified	0	1	1	0	1	ND
5346	Male	PharmD	Not identified	Not identified	Not identified	Not identified	Not identified	Not identified	Identified	Not identified	Not identified	Identified	Not identified	Not identified	Identified	Not identified	Not identified	Not identified	0	1	1	0	1	WV
5245	Female	PharmD	Identified	Identified	Not identified	Not identified	Not identified	Not identified	Identified	Identified	Not identified	Not identified	Not identified	Identified	Identified	Not identified	Not identified	Not identified	0	1	0	1	1	WV
5183	Male	BS	Identified	Not identified	Not identified	Not identified	Not identified	Not identified	Not identified	Not identified	Not identified	Not identified	Not identified	Not identified	Not identified	Not identified	Identified	Not identified	0	1	1	1	1	WV
5353	Male	PharmD	Not identified	Not identified	Not identified	Not identified	Not identified	Not identified	Not identified	Not identified	Not identified	Not identified	Not identified	Not identified	Not identified	Not identified	Not identified	Identified	0	1	1	1	1	WV
4133	Female	PharmD	Not identified	Not identified	Not identified	Not identified	Not identified	Not identified	Not identified	Not identified	Not identified	Identified	Not identified	Not identified	Identified	Not identified	Not identified	Not identified	0	1	0	1	0	OR
1173	Male	PharmD	Identified	Identified	Not identified	Not identified	Not identified	Not identified	Not identified	Not identified	Not identified	Not identified	Not identified	Not identified	Identified	Not identified	Not identified	Not identified	1	1	1	1	0	ND
5113	Male	BS	Not identified	Not identified	Not identified	Not identified	Not identified	Not identified	Not identified	Not identified	Not identified	Not identified	Not identified	Not identified	Identified	Not identified	Not identified	Not identified	0	1	0	0	0	WV
5307	Male	BS	Identified	Not identified	Not identified	Identified	Not identified	Not identified	Not identified	Not identified	Not identified	Not identified	Not identified	Not identified	Not identified	Identified	Not identified	Not identified	0	1	1	1	1	WV
1112	Female	PharmD	Not identified	Not identified	Not identified	Not identified	Not identified	Not identified	Not identified	Not identified	Not identified	Identified	Identified	Not identified	Identified	Not identified	Not identified	Not identified	0	1	0	0	0	ND
1076	Male	PharmD	Identified	Identified	Not identified	Not identified	Not identified	Not identified	Not identified	Not identified	Not identified	Not identified	Not identified	Not identified	Identified	Not identified	Not identified	Not identified	0	1	1	1	1	ND
5408	Female	BS	Identified	Not identified	Not identified	Not identified	Not identified	Not identified	Not identified	Not identified	Not identified	Identified	Not identified	Not identified	Not identified	Identified	Not identified	Not identified	0	1	1	1	1	WV
4090	Male	PharmD	Identified	Not identified	Not identified	Not identified	Not identified	Not identified	Not identified	Not identified	Not identified	Identified	Not identified	Not identified	Identified	Not identified	Not identified	Not identified	0	1	1	0	0	CA
4014	Male	BS	Not identified	Not identified	Not identified	Not identified	Not identified	Not identified	Not identified	Not identified	Not identified	Not identified	Not identified	Not identified	Not identified	Not identified	Not identified	Identified	0	0	0	0	0	CA
2153	Female	PharmD	Identified	Identified	Not identified	Not identified	Not identified	Not identified	Not identified	Not identified	Not identified	Not identified	Not identified	Not identified	Not identified	Identified	Not identified	Not identified	0	1	0	0	0	SD
2042	Female	BS	Not identified	Not identified	Not identified	Not identified	Not identified	Not identified	Identified	Not identified	Not identified	Identified	Not identified	Not identified	Not identified	Not identified	Not identified	Identified	0	1	0	0	0	SD
5390	Female	BS	Not identified	Not identified	Not identified	Not identified	Not identified	Not identified	Not identified	Not identified	Not identified	Identified	Not identified	Not identified	Identified	Not identified	Not identified	Not identified	1	1	0	1	1	WV
5204	Male	BS	Not identified	Not identified	Not identified	Not identified	Not identified	Not identified	Not identified	Not identified	Not identified	Not identified	Not identified	Not identified	Identified	Not identified	Not identified	Not identified	1	1	0	1	1	WV
1039	Female	BS	Identified	Not identified	Not identified	Not identified	Not identified	Not identified	Not identified	Not identified	Not identified	Not identified	Not identified	Not identified	Not identified	Not identified	Not identified	Identified	0	1	0	0	0	ND
5515	Female	BS	Not identified	Not identified	Not identified	Not identified	Not identified	Not identified	Not identified	Not identified	Not identified	Not identified	Not identified	Not identified	Not identified	Not identified	Identified	Not identified	0	0	0	0	1	WV
5349	Female	BS	Identified	Not identified	Identified	Identified	Not identified	Not identified	Not identified	Not identified	Not identified	Not identified	Not identified	Not identified	Not identified	Not identified	Identified	Not identified	0	1	1	1	0	WV
4048	Female	BS	Not identified	Not identified	Not identified	Not identified	Not identified	Not identified	Not identified	Not identified	Not identified	Not identified	Not identified	Not identified	Not identified	Not identified	Not identified	Identified	0	1	0	0	0	OR
2068	Male	PharmD													Not identified	Not identified	Not identified	Not identified	0	1	0	0	1	SD
5311	Female	PharmD													Not identified	Not identified	Not identified	Not identified						WV
4230	Female	PharmD													Not identified	Not identified	Not identified	Not identified	0	1	0	0	1	CA
2069	Female	BS													Not identified	Not identified	Not identified	Not identified						SD
1157	Male	PharmD													Not identified	Not identified	Not identified	Not identified	0	1	0	0	0	ND
2049	Male	BS	Not identified	Not identified	Not identified	Not identified	Not identified	Not identified	Not identified	Not identified	Not identified	Identified	Not identified	Not identified	Not identified	Not identified	Not identified	Not identified						SD
5357	Male	PharmD	Not identified	Not identified	Not identified	Not identified	Not identified	Not identified	Identified	Identified	Not identified	Identified	Not identified	Not identified	Not identified	Not identified	Not identified	Not identified	0	1	1	1	0	WV
2048	Female	PharmD													Not identified	Not identified	Not identified	Not identified						SD
4192	Male	PharmD													Not identified	Not identified	Not identified	Not identified	0	1	0	0	1	OR
5261	Female	PharmD													Not identified	Not identified	Not identified	Not identified						WV
5358	Female	PharmD													Not identified	Not identified	Not identified	Not identified						WV
4079	Female	PharmD													Not identified	Not identified	Not identified	Not identified	1	1	0	1	1	CA
5399	Male	PharmD													Not identified	Not identified	Not identified	Not identified						WV
4204	Male	BS													Not identified	Not identified	Not identified	Not identified						OR
4072	Male	PharmD													Not identified	Not identified	Not identified	Not identified						CA
5029	Male	BS													Not identified	Not identified	Not identified	Identified						WV
4144	Female	BS													Not identified	Not identified	Not identified	Not identified	0	1	0	0	1	OR
1010	Female	PharmD													Not identified	Not identified	Not identified	Not identified	0	1	0	0	0	ND
1064	Female	BS													Not identified	Not identified	Not identified	Not identified						ND
1171	Female	PharmD													Not identified	Not identified	Not identified	Not identified	0	1	0	0	0	ND
4057	Male	PharmD													Not identified	Not identified	Not identified	Not identified	0	1	0	0	1	OR
4189	Male	PharmD													Not identified	Not identified	Not identified	Not identified	0	1	0	0	0	CA
1099	Female	PharmD													Not identified	Not identified	Not identified	Not identified	0	1	0	0	0	ND
4039	Male	BS													Not identified	Not identified	Not identified	Not identified	0	0	0	0	0	CA
4102	Female	PharmD													Not identified	Not identified	Not identified	Not identified	0	1	0	0	1	OR
5210	Male	PharmD	Identified	Not identified	Identified	Not identified	Not identified	Not identified	Identified	Not identified	Not identified	Identified	Not identified	Not identified	Not identified	Not identified	Not identified	Not identified						WV
2071	Female	PharmD													Not identified	Not identified	Not identified	Not identified						SD
2063	Female	PharmD													Not identified	Not identified	Not identified	Not identified	0	1	1	1	1	SD
2059	Female	PharmD	Not identified	Not identified	Not identified	Not identified	Not identified	Not identified	Not identified	Not identified	Not identified	Not identified	Not identified	Not identified	Not identified	Not identified	Not identified	Not identified						SD
